# Supplementary material for: Clinical features and natural history of the first 2073 suspected COVID-19 cases in the Corona São Caetano primary care programme: a prospective cohort study
Source: PubMed Central journal article supplement (PMC7805372; doi:10.1136/bmjopen-2020-042745), 2021-01-12
Supplement: bmjopen-2020-042745.draft_revisions.pdf [file bmjopen-2020-042745.draft_revisions.pdf]

# BMJ Open

BMJ Open is committed to open peer review. As part of this commitment we make the peer review history of every article we publish publicly available.

When an article is published we post the peer reviewers' comments and the authors' responses online. We also post the versions of the paper that were used during peer review. These are the versions that the peer review comments apply to.

The versions of the paper that follow are the versions that were submitted during the peer review process. They are not the versions of record or the final published versions. They should not be cited or distributed as the published version of this manuscript.

BMJ Open is an open access journal and the full, final, typeset and author-corrected version of record of the manuscript is available on our site with no access controls, subscription charges or pay-per-view fees (<http://bmjopen.bmj.com>).

If you have any questions on BMJ Open's open peer review process please email [info.bmjopen@bmj.com](mailto:info.bmjopen@bmj.com)

# BMJ Open

## A primary care approach to the COVID-19 pandemic: clinical features and natural history of 2,073 suspected cases in the Corona Sao Caetano programme, Sao Paulo, Brazil

|                               |                                                                                                                                                                                                                                                                                                                                                                                                                                                                                                                                                                                                                                                                                                                                                                                                                                                                                                                                                                                                                                                                                                                                                                                                                                                                                                                                                                                                                                                                                                                                                                                                                                                                                                                                                                                                                                                                                                                                                                                                   |
|-------------------------------|---------------------------------------------------------------------------------------------------------------------------------------------------------------------------------------------------------------------------------------------------------------------------------------------------------------------------------------------------------------------------------------------------------------------------------------------------------------------------------------------------------------------------------------------------------------------------------------------------------------------------------------------------------------------------------------------------------------------------------------------------------------------------------------------------------------------------------------------------------------------------------------------------------------------------------------------------------------------------------------------------------------------------------------------------------------------------------------------------------------------------------------------------------------------------------------------------------------------------------------------------------------------------------------------------------------------------------------------------------------------------------------------------------------------------------------------------------------------------------------------------------------------------------------------------------------------------------------------------------------------------------------------------------------------------------------------------------------------------------------------------------------------------------------------------------------------------------------------------------------------------------------------------------------------------------------------------------------------------------------------------|
| Journal:                      | <i>BMJ Open</i>                                                                                                                                                                                                                                                                                                                                                                                                                                                                                                                                                                                                                                                                                                                                                                                                                                                                                                                                                                                                                                                                                                                                                                                                                                                                                                                                                                                                                                                                                                                                                                                                                                                                                                                                                                                                                                                                                                                                                                                   |
| Manuscript ID                 | bmjopen-2020-042745                                                                                                                                                                                                                                                                                                                                                                                                                                                                                                                                                                                                                                                                                                                                                                                                                                                                                                                                                                                                                                                                                                                                                                                                                                                                                                                                                                                                                                                                                                                                                                                                                                                                                                                                                                                                                                                                                                                                                                               |
| Article Type:                 | Original research                                                                                                                                                                                                                                                                                                                                                                                                                                                                                                                                                                                                                                                                                                                                                                                                                                                                                                                                                                                                                                                                                                                                                                                                                                                                                                                                                                                                                                                                                                                                                                                                                                                                                                                                                                                                                                                                                                                                                                                 |
| Date Submitted by the Author: | 14-Jul-2020                                                                                                                                                                                                                                                                                                                                                                                                                                                                                                                                                                                                                                                                                                                                                                                                                                                                                                                                                                                                                                                                                                                                                                                                                                                                                                                                                                                                                                                                                                                                                                                                                                                                                                                                                                                                                                                                                                                                                                                       |
| Complete List of Authors:     | <p>Leal, Fabio ; Universidade Municipal de São Caetano do Sul; Instituto Nacional de Cancer</p> <p>Mendes-Correa, Maria; Universidade de São Paulo, Instituto de Medicina Tropical (LIM-52, LIM-46, LIM-49) and Departamento de Moléstias Infecciosas e Parasitarias</p> <p>Buss, Lewis; Universidade de São Paulo, Instituto de Medicina Tropical (LIM-52, LIM-46, LIM-49) and Departamento de Moléstias Infecciosas e Parasitarias</p> <p>Costa, Silvia; Universidade de São Paulo, Instituto de Medicina Tropical (LIM-52, LIM-46, LIM-49) and Departamento de Moléstias Infecciosas e Parasitarias</p> <p>Bizarro, Joao; Universidade Municipal de São Caetano do Sul</p> <p>de Souza, Sonia ; Universidade Municipal de São Caetano do Sul</p> <p>Thomaz, Osorio; Instituto de Pesquisas Tecnológicas</p> <p>Tozetto-Mendoza, Tania; Universidade de São Paulo, Instituto de Medicina Tropical (LIM-52, LIM-46, LIM-49) and Departamento de Moléstias Infecciosas e Parasitarias</p> <p>Villas-Boas, Lucy; Universidade de São Paulo, Instituto de Medicina Tropical (LIM-52, LIM-46, LIM-49) and Departamento de Moléstias Infecciosas e Parasitarias</p> <p>Oliveira, Lea; Universidade de São Paulo, Instituto de Medicina Tropical (LIM-52, LIM-46, LIM-49) and Departamento de Moléstias Infecciosas e Parasitarias</p> <p>Grespan, Regina; Universidade Municipal de São Caetano do Sul</p> <p>Capuani, Ligia; Modular Research System</p> <p>Buccheri, Renata; Universidade de São Paulo, Instituto de Medicina Tropical (LIM-52, LIM-46, LIM-49) and Departamento de Moléstias Infecciosas e Parasitarias</p> <p>Domingues, Helves; Modular Research System</p> <p>Alexander, Neal; London School of Hygiene &amp; Tropical Medicine</p> <p>Mayaud, Philippe; London School of Hygiene &amp; Tropical Medicine</p> <p>Sabino, Ester; Universidade de São Paulo, Instituto de Medicina Tropical (LIM-52, LIM-46, LIM-49) and Departamento de Moléstias Infecciosas e Parasitarias</p> |
| Keywords:                     | PRIMARY CARE, Epidemiology < TROPICAL MEDICINE, INFECTIOUS DISEASES, PUBLIC HEALTH                                                                                                                                                                                                                                                                                                                                                                                                                                                                                                                                                                                                                                                                                                                                                                                                                                                                                                                                                                                                                                                                                                                                                                                                                                                                                                                                                                                                                                                                                                                                                                                                                                                                                                                                                                                                                                                                                                                |
|                               |                                                                                                                                                                                                                                                                                                                                                                                                                                                                                                                                                                                                                                                                                                                                                                                                                                                                                                                                                                                                                                                                                                                                                                                                                                                                                                                                                                                                                                                                                                                                                                                                                                                                                                                                                                                                                                                                                                                                                                                                   |

1  
2  
3  
4  
5  
6  
7  
8  
9  
10  
11  
12  
13  
14  
15  
16  
17  
18  
19  
20  
21  
22  
23  
24  
25  
26  
27  
28  
29  
30  
31  
32  
33  
34  
35  
36  
37  
38  
39  
40  
41  
42  
43  
44  
45  
46  
47  
48  
49  
50  
51  
52  
53  
54  
55  
56  
57  
58  
59  
60

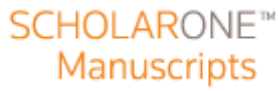

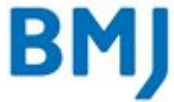

I, the Submitting Author has the right to grant and does grant on behalf of all authors of the Work (as defined in the below author licence), an exclusive licence and/or a non-exclusive licence for contributions from authors who are: i) UK Crown employees; ii) where BMJ has agreed a CC-BY licence shall apply, and/or iii) in accordance with the terms applicable for US Federal Government officers or employees acting as part of their official duties; on a worldwide, perpetual, irrevocable, royalty-free basis to BMJ Publishing Group Ltd ("BMJ") its licensees and where the relevant Journal is co-owned by BMJ to the co-owners of the Journal, to publish the Work in this journal and any other BMJ products and to exploit all rights, as set out in our [licence](#).

The Submitting Author accepts and understands that any supply made under these terms is made by BMJ to the Submitting Author unless you are acting as an employee on behalf of your employer or a postgraduate student of an affiliated institution which is paying any applicable article publishing charge ("APC") for Open Access articles. Where the Submitting Author wishes to make the Work available on an Open Access basis (and intends to pay the relevant APC), the terms of reuse of such Open Access shall be governed by a Creative Commons licence – details of these licences and which [Creative Commons](#) licence will apply to this Work are set out in our licence referred to above.

Other than as permitted in any relevant BMJ Author's Self Archiving Policies, I confirm this Work has not been accepted for publication elsewhere, is not being considered for publication elsewhere and does not duplicate material already published. I confirm all authors consent to publication of this Work and authorise the granting of this licence.



1  
2  
3 **A primary care approach to the COVID-19 pandemic: clinical features and natural**  
4 **history of 2,073 suspected cases in the Corona São Caetano programme, São Paulo,**  
5 **Brazil**  
6  
7  
8  
9

10 Fabio E Leal<sup>1,2\*</sup> (PhD), Maria C Mendes-Correa<sup>3\*</sup> (PhD), Lewis F Buss<sup>3\*#</sup> (MBBS), Silvia  
11 F Costa<sup>3</sup> (PhD), Joao CS Bizario<sup>1</sup> (PhD), Sonia RP de Souza<sup>1</sup> (PhD), Osorio Thomaz<sup>4</sup> (PhD),  
12 Tania R Tozetto-Mendoza<sup>1</sup> (PhD), Lucy S Villas-Boas<sup>3</sup>, Lea CO Silva<sup>3</sup> (PhD), Regina MZ  
13 Grespan (MD)<sup>1</sup>, Ligia Capuani<sup>5</sup> (PhD), Renata Buccheri<sup>3</sup> (MD), Helves Domingues (PhD)<sup>5</sup>,  
14 Neal DE Alexander<sup>6</sup> (PhD), Philippe Mayaud<sup>6</sup> (MD), Ester C Sabino<sup>3</sup> (PhD)  
15  
16  
17  
18  
19

20 \* These authors contributed equally  
21  
22

23 **Affiliations**  
24

- 25 1. Universidade Municipal de São Caetano do Sul (USCS), Rua Santo Antonio, São  
26 Caetano do Sul, Brazil
- 27 2. National Cancer Institute (INCA), Praça Cruz Vermelha, Rio de Janeiro, Brazil
- 28 3. Instituto de Medicina Tropical (LIM-52, LIM-46, LIM-49) and Departamento de  
29 Moléstias Infecciosas e Parasitárias da Faculdade de Medicina da Universidade de São  
30 Paulo Avenida Dr. Enéas Carvalho de Aguiar, São Paulo, Brazil
- 31 4. Instituto de Pesquisas Tecnológicas do Estado de São Paulo - IPT
- 32 5. Modular Research System, Avenida Paulista, São Paulo, Brazil
- 33 6. London School of Hygiene and Tropical Medicine (LSHTM), Keppel Street, London,  
34 United Kingdom  
35  
36  
37  
38  
39  
40  
41  
42  
43  
44

45 **Corresponding author:**

46 # Dr Lewis F Buss

47 Instituto de Medicina Tropical da Faculdade de Medicina da Universidade de São Paulo

48 [lewisbuss@usp.br](mailto:lewisbuss@usp.br)  
49  
50  
51  
52  
53  
54

55 **KEY WORDS:** SARS-CoV-2, COVID-19, pandemic, community, primary care, Brazil  
56  
57  
58  
59  
60

## ABSTRACT

**Background:** Despite most cases not requiring hospital care, there are limited community-based clinical data on COVID-19.

**Methods:** The Corona São Caetano program is a primary care initiative offering COVID-19 care to all residents of São Caetano do Sul, Brazil. After triage of potentially severe cases, consecutive patients presenting between 13th April and 13th May 2020 were tested at home with SARS-CoV-2 reverse transcriptase (RT) PCR; positive patients were followed up for 14 days. RT-PCR-negative patients were offered SARS-CoV-2 serology. We describe the clinical features, virology and natural history of this prospective population-based cohort.

**Findings:** Of 2,073 suspected COVID-19 cases, 1,583 (76.4%) were tested by RT-PCR, of whom 444 (28.0%, 95%CI: 25.9% - 30.3%) were positive; 604/1,136 (53%) RT-PCR-negative patients underwent serology, of whom 52 (8.6%) tested SARS-CoV-2 seropositive. The most common symptoms of COVID-19 were cough, fatigue, myalgia and headache; whereas self-reported fever (OR 3.0, 95%CI 2.4-3.9), anosmia (OR 3.3, 95%CI 2.6-4.4), and ageusia (2.9, 95%CI 2.3-3.8) were most associated with a positive COVID-19 diagnosis. RT-PCR cycle thresholds were lower in men, older patients, those with fever and arthralgia, and around symptom onset. The rates of hospitalization and death among 444 RT-PCR-positive cases were 6.7% and 0.7%, respectively, with older age and obesity more frequent in the hospitalized group.

**Conclusion:** COVID-19 presents in a similar way to other mild respiratory disease in the community, but some symptoms can assist the differential diagnosis. Most patients recovered without requiring hospitalization with a low fatality rate compared to hospital-based studies.

### Strengths and limitations of this study

1. The clinical features of COVID-19 have mostly been described in hospital-based studies which are necessarily biased towards severe disease
2. We report a prospective cohort of suspected and confirmed COVID-19 cases from a primary care initiative in the Brazilian municipality of São Caetano do Sul
3. By systematically testing consecutive suspected community cases with molecular and serological tests we were able to address the diagnostic value of clinical features of mild-moderate COVID-19 in primary care
4. Prospective follow-up of confirmed cases and linkage with hospital datasets allowed us to describe the natural history of a primary care COVID-19 population
5. A limitation of the work was that not all participants underwent serology testing due to loss to follow-up

## INTRODUCTION

A comprehensive public health response is vital but difficult to achieve during an epidemic. The COVID-19 pandemic, caused by the novel severe acute respiratory syndrome coronavirus 2 (SARS-CoV-2), started in China in late 2019.<sup>1</sup> According to the World Health Organization (WHO)<sup>2</sup> and others<sup>3</sup>, the ideal early response should have been multipronged, with identification, isolation, treatment and contact tracing of symptomatic cases, relying on a strong testing programme. Primary health care (PHC) is well placed to implement such a response, by identifying cases early and managing them in a way that minimizes overcrowding of emergency rooms and intensive care units.<sup>4</sup> Real-time data analysis coming from these primary care response systems can inform policy decisions.

In Brazil, the first case of COVID-19 was identified in the city of São Paulo on 26th February 2020.<sup>5</sup> As of 15<sup>th</sup> June 2020 there were 1,400,000 cases nationally with São Paulo contributing a fifth of these.<sup>6</sup> In March 2020, the Municipal Health Department of the municipality of São Caetano do Sul – part of the Greater Metropolitan Region of São Paulo – began to develop a clinical and testing platform to organize its COVID-19 response. The aim was to provide universal detection and management of symptomatic cases and their contacts. The platform was developed in partnership with two local universities – the Municipal University of São Caetano do Sul (USCS) and the University of Sao Paulo (USP) – and called “Corona São Caetano”.

Large scale community-based observational cohorts are difficult to establish under epidemic circumstances, particularly if the risk of exposure for research personnel is high. Hence, most COVID-19 epidemiological and clinical studies have been hospital-based,<sup>7–9</sup> and therefore tend to include more severe cases whose findings may not be generalizable to the general population.<sup>10</sup> The objectives of this study were to describe the epidemiological indicators of the early phase of the programme rollout; and to describe the clinical, virologic and natural history features (including hospitalization and deaths) of SARS-CoV-2 infection among patients identified in primary care.

## METHODS

### Setting

The municipality of São Caetano do Sul has a population of 161,000 inhabitants.<sup>11</sup> The active aging index (i.e., the ratio of population aged >60 yr / population aged ≤14 yr) is 135, compared to the Brazilian average of 52, reflecting an aging population;<sup>11</sup> its Human Development Index is one of the highest in the country; nearly all (97.4%) children aged 6-14 are in education and 31% of the population have completed higher education<sup>12</sup> (Brazilian national average is 11%).

### Corona São Caetano platform

Residents of the municipality aged 12 years and older with suspected COVID-19 symptoms were encouraged to contact the dedicated Corona São Caetano platform via the website (access at <https://coronasaocaetano.org/>) or by phone. They were invited to complete an initial screening questionnaire that included socio-demographic data; information on symptoms type, onset and duration; and recent contacts.

Patients meeting the suspected COVID-19 case definition (i.e., having at least two of the following symptoms: fever, cough, sore throat, coryza, or change in/loss of smell (anosmia); or one of these symptoms plus at least two other symptoms consistent with COVID-19) were further evaluated, whilst people not meeting these criteria were reassured, advised to stay at home and contact the service again if they were to develop new symptoms or worsening of current ones. Patients were then called by a medical student to complete a risk assessment. All pregnant women, and patients meeting pre-defined triage criteria for severe disease (see Supplemental Material), were advised to attend a hospital service - either an emergency department or outpatient service, depending on availability. All other patients were offered a home visit for self-collection of a nasopharyngeal swab.

### Sample collection

Nasopharyngeal swabs (NPS – both nostrils and throat) were collected at the patients' homes under the supervision of trained healthcare personnel. A link to a video

1  
2  
3 (<https://youtu.be/rWZzV2ZP7KY>) was sent to the patients, before the home visit, to provide  
4 guidance on self-collection procedures. Healthcare personnel were instructed to maintain a  
5 distance of six feet from the patient and to wear personal protective equipment at all times.  
6  
7 Samples were immediately put on a cool box between 2-8°C and stored at 4°C in a fridge  
8  
9 until shipment to the lab within 24 hours.  
10  
11  
12

### 13 **Follow-up procedures**

14  
15  
16  
17 Patients testing SARS-CoV-2 RT-PCR positive were followed up to 14 days (a maximum of  
18 7 phone calls) from completion of their initial questionnaire. They were contacted every 48  
19 hours by a medical student who completed another risk assessment and recorded any ongoing  
20 or new symptoms. Patients testing RT-PCR negative were followed up by the primary health  
21 care program for their residential area. They were advised to contact the platform for a new  
22 consultation if they developed new symptoms. Starting on May 19<sup>th</sup>, when serological  
23 testing became available, RT-PCR-negative patients were re-contacted to offer antibody  
24 (IgG/IgM combined) testing 14 days after their initial registration as long as they had become  
25 asymptomatic.  
26  
27  
28  
29  
30  
31  
32  
33

### 34 **Study dates**

35  
36  
37 The Corona São Caetano programme was launched on 6th April 2020 and is still ongoing at  
38 the time of writing. For this analysis, we opted to include all patients making their first  
39 contact with the programme between 13th April and 13th May 2020. This comprises the first  
40 31 days of the response, having excluded the first week, which corresponded to a pilot phase  
41 designed to test instruments before roll-out. The period of follow-up (last date of data  
42 extraction) was 4th June 2020, to account for the accrual period (three weeks) of possible  
43 hospitalizations in the last included patients.  
44  
45  
46  
47  
48  
49  
50

### 51 **Laboratory methods**

52  
53  
54 Due to shortages of some reagents, two RT-PCR platforms were used at different times  
55 during the study: ALTONA RealStar® SARS-CoV-2 RT-PCR Kit 1.0 (Hamburg, Germany)  
56 and the Mico BioMed RT-qPCR kit (Seongnam, South Korea). For serology we tested 10µL  
57 of serum or plasma (equivalent in performance) using a qualitative rapid chromatographic  
58  
59  
60

1  
2  
3 immunoassay (Wondfo Biotech Co., Guangzhou, China), that jointly detects anti-SARS-  
4 CoV-2 IgG/IgM. The assay has been found to have a sensitivity of 81.5% and specificity of  
5 99.1% in a US study<sup>13</sup>. In our local validation, after two weeks of symptoms, the sensitivity  
6 in 59 RT-PCR confirmed cases was 94.9%, and specificity in 106 biobank samples from  
7 2019 was 100%.

### 13 **Statistical methods**

14  
15  
16  
17 We estimated the contribution of our platform to COVID-19 diagnosis in São Caetano do  
18 Sul. We compared the number of cases diagnosed in our programme with official data  
19 released by the Municipal Department of Health in its daily bulletins (accessed here  
20 <https://coronavirus.saocaetanodosul.sp.gov.br>).

21  
22  
23  
24  
25  
26 Clinical and demographic data were extracted directly from the Corona São Caetano  
27 information system, with the last export on 5<sup>th</sup> June, to allow for follow-up of patients at the  
28 end of the study period. To analyse clinical presentation, we first calculated the proportion  
29 and exact binomial 95% confidence intervals (CI) of cases reporting each symptom in the  
30 three testing groups: SARS-CoV-2 RT-PCR positive; RT-PCR negative / seropositive; and  
31 RT-PCR negative / seronegative. We next combined RT-PCR and serology positive cases to  
32 make confirmed COVID-19 group, and those negative on both tests to make a SARS-CoV-2  
33 negative control group. We express the association between each symptom and a positive  
34 COVID-19 diagnosis as odds ratios (OR) and 95% CIs.

35  
36  
37  
38  
39  
40  
41  
42  
43 Next, we assessed associations between RT-PCR cycle thresholds (Cts) and other clinical  
44 features. ALTONA and MiCo BioMed RT-PCR kits each separately amplify two different  
45 SARS-CoV-2 viral genes, as such each patient had two Ct values. There was a high  
46 concordance between Cts for the two genes within each kit (Figure S1), and we opted therefore  
47 to use the mean of the two Ct values for each patient in all analyses. We calculated univariable  
48 associations between Cts and age, sex, delay from symptom onset to NPS collection, and  
49 presenting symptoms using simple linear regression. We then built a multivariable linear  
50 regression model to assess independent associations between presenting symptoms and RT-  
51 PCR Cts. As age, sex, and time of swab collection may confound this relationship we included  
52 these variables, as well as the RT-PCR platform (ALTONA vs MiCo BioMed), as covariates  
53 in the model.

1  
2  
3  
4  
5 For RT-PCR positive patients (followed up for 14 days), hospitalizations and deaths were  
6 extracted from the study platform. To extend the follow-up period and to capture RT-PCR  
7 negative patients and those initially triaged to hospital (no study follow-up), hospitalization  
8 and vital status was confirmed by linkage with two administrative databases: the municipal  
9 epidemiological surveillance dataset, as well as the state-wide influenza-like illness  
10 notification system (SIVEP-Gripe). Linkage was last performed on 5<sup>th</sup> June 2020, 23 days  
11 after the last patient was enrolled. Categorical patient characteristics were compared  
12 according to hospitalization status using a Chi-squared or Fisher exact test. Continuous  
13 variables were compared using the Wilcoxon rank sum test.  
14  
15  
16  
17  
18  
19  
20  
21

22 The cohort sample included consecutive cases presenting to the Corona São Caetano program  
23 and a formal sample size calculation was not performed. Missing data were excluded. All  
24 analyses were conducted in R Software for Statistical Computing, version 3.6.3.<sup>14</sup>  
25  
26  
27  
28

### 29 **Ethics**

30  
31  
32 The study was approved by the local ethics committee (Comissão de Ética para Análise de  
33 Projeto de Pesquisa - CAPPesq, protocol No. 13915, dated June 03, 2020). The committee  
34 waived the need for informed consent and allowed the development of an analytical dataset  
35 with no personal identification for the current analysis.  
36  
37  
38  
39  
40

### 41 **Patient and public involvement**

42  
43  
44 Patients were not involved in the planning of this research.  
45  
46  
47  
48  
49  
50  
51  
52  
53  
54  
55  
56  
57  
58  
59  
60



## RESULTS

### Epidemiological and programmatic indicators

Between 13<sup>th</sup> April and 13<sup>th</sup> May 2020, there were 2,073 presentations, from 2,011 individual patients, that met the criteria for a suspected COVID-19 case (See Figure 1 for study flow). At initial phone interview, 132 (6%) potential cases were advised to go directly to a health service based on the triage questions, and 12 (0.6%) because of pregnancy. Only four (3%) of referred patients were admitted to hospital and none died.

In total 1,583 individual patients were tested with RT-PCR for SARS-CoV-2; 444 (28.0%, 95%CI 25.9%-30.3%) were positive. The proportion of positive results was stable over the study (Figure S2). Among the RT-PCR negative group, 604 (53% of 1,136) underwent serology testing, of whom 52 (8.6%, 95%CI 6.6% - 11.1%) were seropositive. The median [IQR] time from symptom onset to serology collection was 31 [26 – 37] days. The age-sex structure of patients being tested differed from the underlying population of São Caetano do Sul (Figure S3) with an overrepresentation of working-age adults and women. At the beginning of programme roll out, 75% of notified COVID-19 cases in São Caetano do Sul were diagnosed in outpatient or hospital services. Over the study period, adherence to the programme increased, and by May 13<sup>th</sup>, 2020, 78% of cases in the municipality were diagnosed within our programme.

Of 444 RT-PCR positive patients eligible for longitudinal follow-up, 326 (73%) had their final follow-up visit at least 14 days after their initial presentation. Of the seven possible follow-up questionnaires, 384 (86%) COVID-19 patients completed three or more, and 162 (36%) completed all seven.

### Participant characteristics

Patient characteristics are shown in Table 1. Although women were overrepresented in the cohort, there were proportionally more males in the RT-PCR positive and seropositive groups compared to the seronegative group. Of note, 55% of RT-PCR negative/seronegative patients had completed higher education compared to 35% RT-PCR-positive patients ( $p < 0.001$ , Chi-

squared test). The median number of days from symptom onset to swab collection was 5.0 (interquartile range [IQR], 4.0-7.0) among RT-PCR positive patients and 6.0 (IQR, 4.0-8.3) among RT-PCR negative/seropositive patients ( $p = 0.06$ , Wilcoxon rank sum) (Figure S4). Chronic respiratory disease was less frequent in RT-PCR positive than dual-negative patients.

## Symptoms of COVID-19

The prevalence of individual symptoms at presentation is shown in Figure 2A stratified by final diagnostic category. The most frequent symptoms among RT-PCR and seropositive patients were headache (82% and 75%), myalgia (80% and 80%), cough (77% and 63%), and fatigue (77% and 79%). Anosmia was present in 56% and 63% of RT-PCR positive and seropositive patients, respectively, compared to 30% in those testing doubly negative. A similar pattern was observed for ageusia (53% and 53% versus 30%). Upper respiratory tract symptoms - including coryza, blocked nose, ageusia, and anosmia - were more frequent in younger people (Figure 2B). The evolution of symptoms over time among RT-PCR positive patients is shown in Figure S5.

The odds ratios for testing positive for SARS-CoV-2 (RT-PCR or serology) associated with each presenting symptom are shown in Figure 3. The symptoms with strongest associations were anosmia (OR 3.3, 95%CI 2.6-4.4), fever (3.0, 95%CI 2.4-3.9) and ageusia (2.9, 95%CI 2.3-3.8). The presence of sore throat (0.53, 95%CI 0.41-0.68) and diarrhoea (0.72, 95%CI 0.55-0.96) were associated with a negative SARS-CoV-2 test.

## Associations between SARS-CoV-2 RT-PCR Cycle threshold (Ct) values, and demographic and clinical features

Figure 4 shows the associations between mean RT-PCR cycle threshold and demographic features and symptoms at presentation. Older age was associated with lower cycle thresholds, with a change in mean Ct of -0.05 (95%CI -0.09 to -0.01) for each additional year of age. The mean difference in Ct value was -1.36 (95% CI -2.49 to -0.23) in men compared to women. For each doubling in the number of days from symptom onset to swab collection the mean Ct value increased by 3.28 (95%CI 2.33 to 4.03). Presenting symptoms of fever and arthralgia were associated with lower Cts, whereas anosmia, ageusia, vomiting, diarrhoea, and nausea were associated with higher Cts (Figure 4 and Table S1). After adjustment for age, sex, delay

1  
2  
3 from symptom onset, and RT-PCR platform used, fever (-0.06, 95%CI -2.11 to -0.001) and  
4 arthralgia (-1.24, -2.18 to -0.10) remained associated with lower Cts, and anosmia (2.21, 1.0  
5 to 3.29), ageusia (1.96, 0.88 to 3.0), and diarrhoea (1.36, 0.12 to 2.61) with higher Cts  
6  
7 (Table S1).  
8  
9

## 10 11 **Hospitalizations and deaths**

12  
13  
14  
15 Of the 444 RT-PCR positive patients, 30 (6.8%) had been hospitalized by 5<sup>th</sup> June 2020,  
16 when the database linkage was last updated, and three (0.7%) had died; in-hospital mortality  
17 was therefore 10% (3/30). In 28 cases the date of admission was available. The median time  
18 from symptom onset to hospital admission was 7 (range 2 to 14) days. Among 1,136 RT-  
19 PCR-negative patients, six (0.5%) had been admitted to hospital. One (<0.01% of 1,136) of  
20 these six patients died. None of the 604 RT-PCR negative patients that underwent serology  
21 were admitted to hospital or died. Table 2 compares patient characteristics by hospitalization  
22 status. Notably, hospitalized patients were older, had more cardiovascular comorbidities and  
23 were more frequently obese.  
24  
25  
26  
27  
28  
29  
30  
31  
32  
33  
34  
35  
36  
37  
38  
39  
40  
41  
42  
43  
44  
45  
46  
47  
48  
49  
50  
51  
52  
53  
54  
55  
56  
57  
58  
59  
60

## DISCUSSION

We present a community-based cohort of suspected COVID-19 cases recruited through a primary care initiative in the Brazilian municipality of São Caetano do Sul. Offering RT-PCR testing to all patients presenting with symptoms compatible with COVID-19, the positivity rate was 28%, with 8.6% of those testing negative subsequently found to be seropositive - i.e. > 35% of the cohort had a diagnosis of COVID-19. Anosmia, ageusia, and self-reported fever provided the greatest diagnostic value in identifying COVID-19. The rate of hospitalization and deaths among RT-PCR positive patients was low, at 6.8% and 0.7%, respectively. Our results provide important information on the clinical presentation, diagnostic testing and natural history of COVID-19 identified in the community.

Extrapolating the seropositivity rate among RT-PCR negative patients to the 532 that were not tested with serology, we estimate that an additional 46 seropositive cases would have been identified. This corresponds to a false-negative rate of 18% among potential symptomatic COVID-19 cases. This is lower than a recent pooled analysis: nadir of 20% at three days post-symptom onset.<sup>15</sup> Viral load peaks around the time of symptom onset and remains high over the first symptomatic week (also see Figure 4A).<sup>16,17</sup> Consistent with this, we found a slightly longer delay to swab collection in RT-PCR false-negative patients than RT-PCR positive patients (Figure S4).

COVID-19 presents in a similar way to other respiratory viral illnesses. Indeed, in our cohort the most common symptoms of COVID-19 - such as cough, fatigue, headache, etc. - were reported with a similar frequency among patients testing negative. It is therefore important to have identified anosmia, ageusia, self-reported fever, myalgia, and anorexia as the symptoms with greatest value in the differential diagnosis of COVID-19 in primary care. Conversely, sore throat and diarrhoea - both considered symptoms of COVID-19 in other settings –<sup>18</sup> were more frequently due to other aetiologies in this primary care context. These results are robust for a number of reasons. Firstly, our sample is representative of the population of interest - i.e. consecutive patients with suspected COVID-19 in the community - instead of extrapolating from hospital cases. Symptom data were collected prospectively, eliminating recall or interviewer bias. Finally, we have a control group of patients who were negative for both RT-PCR and serology, minimizing misclassification due to false negative RT-PCR.

1  
2  
3  
4  
5 In our study, the proportion of patients with a positive SARS-CoV-2 RT-PCR requiring  
6 hospitalization was low (7%). Early reports from China were of 13.8% of cases being  
7 severe<sup>19</sup>, but this value was lower when under ascertainment of cases was accounted for.<sup>20,21</sup>  
8  
9 This is because our cohort reflects mild to moderate cases, as severely ill patients are likely to  
10 have attended hospital directly. As such, only 3% of patients we triaged to attend health  
11 services were ultimately hospitalized, possibly due to self-selection of patients presenting to  
12 our service. Supporting this notion, our overall case fatality ratio among RT-PCR positive  
13 patients was 0.7%.  
14  
15  
16  
17  
18  
19

20  
21 Our study has some limitations. Serology was not performed on all RT-PCR negative patients  
22 due to on-going symptoms, loss to follow-up, or patient refusal. Of note, none of the RT-  
23 PCR-negative patients that were admitted to hospital underwent serology testing. This  
24 suggests that patients who were not tested with serology may have had a higher prevalence of  
25 COVID-19 than those that were tested. In addition, imperfect serology test performance  
26 (81% sensitivity)<sup>13</sup> will introduced false-negative results. Taken together, these biases may  
27 have underestimated the true seroprevalence among RT-PCR-negative cases, as well as the  
28 false-negative rate of RT-PCR. The latter calculation may also have been influenced by the  
29 inclusion of RT-PCR positive patients in the denominator, introducing an incorporation bias.<sup>22</sup>  
30  
31  
32  
33  
34  
35  
36  
37

38 A key strength to our study relates to the provision of primary healthcare in Brazil and its  
39 symbiosis with medical training nationwide. Primary health care - within the family health  
40 strategy (*Estratégia Saúde da Família*) - is centered around a healthcare unit with a multi-  
41 professional team that is responsible for all residents in the immediate catchment area<sup>23</sup>. São  
42 Caetano do Sul has 100% coverage with the family health strategy, and medical students  
43 from the municipal university (USCS) are integrated into the healthcare teams and  
44 progressively trained from the first year of medical school. Our initiative took advantage of  
45 this existing system, with the addition of an online platform allowing remote clinical  
46 assessment and follow-up. The suspension of normal clinical training at the medical school  
47 provided the workforce. The partnership with the University of São Paulo, which provided  
48 the laboratory diagnostics, created the unique opportunity to establish our prospective  
49 community cohort of suspected and confirmed COVID-19 cases. But we believe that this  
50 infrastructure can be implemented in other regions with less resources. Other respiratory  
51 disease such as influenza, measles, or tuberculosis may benefit from similar approach.  
52  
53  
54  
55  
56  
57  
58  
59  
60

## CONTRIBUTION STATEMENT

FL, MC, SC, MC, RB, and ES conceived and designed the study. FL, RG, and JB provided clinical oversight and supervision of medical students. FL, MC, LB, HD, and SS collected and curated the data. MC, TM, LV, and LS performed the laboratory analysis. LB performed the formal statistical analysis with assistance from FL, SS, NA, PM, ES. LB, FL, PM and ES wrote the first draft, and all authors reviewed, contributed to and approved the final version.

## CONFLICTS OF INTEREST STATEMENT

The authors have no conflicts of interests.

## FUNDING STATEMENT

The municipal health department of São Caetano do Sul (Secretaria Municipal de Saúde da Prefeitura de São Caetano do Sul) funded the establishment and implementation of the platform. We also acknowledge an award from FAPESP (2018/14389-0) and the UK Medical Research Council (MR/S0195/1) to the Brazil-UK Centre for Arbovirus Discovery, Diagnosis, Genomics and Epidemiology (CADDE).

## DATA SHARING STATEMENT

Data will be made available by reasonable request to the corresponding author and following local ethnics approval.

## REFERENCES

- 1 World Health Organization. (2020). Pneumonia of unknown cause – China. (<https://www.who.int/csr/don/05-january-2020-pneumonia-of-unkown-cause-china/en/>, accessed 2020-06-18).
- 2 World Health Organization. Critical preparedness, readiness and response actions for COVID-19 (Interim Guidance) (<https://www.who.int/publications-detail/critical-preparedness-readiness-and-response-actions-for-covid-19>, accessed 15 June 2020).
- 3 Hellewell J, Abbott S, Gimma A, et al. Feasibility of controlling COVID-19 outbreaks by isolation of cases and contacts. *Lancet Glob Health* 2020; 8: e488–96.
- 4 World Health Organization. Regional Office for the Western Pacific. (2020). Role of primary care in the COVID-19 response. (<https://apps.who.int/iris/handle/10665/331921>, accessed 15 June, 2020).
- 5 World Health Organization. Situation report 27 (2020). (<https://www.who.int/emergencies/diseases/novel-coronavirus-2019/situation-reports>, accessed 15 June 2020).
- 6 Brazilian Ministry of Health. (<https://covid.saude.gov.br/>, accessed 15 June 2020).
- 7 Docherty AB, Harrison EM, Green CA, et al. Features of 20 133 UK patients in hospital with covid-19 using the ISARIC WHO Clinical Characterisation Protocol: prospective observational cohort study. *BMJ* 2020; m1985.
- 8 Richardson S, Hirsch JS, Narasimhan M, et al. Presenting Characteristics, Comorbidities, and Outcomes Among 5700 Patients Hospitalized With COVID-19 in the New York City Area. *JAMA* 2020; **323**: 2052.
- 9 Zhou F, Yu T, Du R, et al. Clinical course and risk factors for mortality of adult inpatients with COVID-19 in Wuhan, China: a retrospective cohort study. *Lancet* 2020; **395**: 1054–62.
- 10 Rauh AL, Linder JA. Covid-19 care before, during, and beyond the hospital. *BMJ* 2020; m2035.
- 11 Instituto Brasileiro de Geografia e Estatística (IBGE). (2020). São Caetano do Sul / Panorama. (<https://cidades.ibge.gov.br/brasil/sp/sao-caetano-do-sul/panorama>, accessed 20 June 2020).
- 12 Human Development Atlas Brazil. (2020). São Caetano do Sul ([http://atlasbrasil.org.br/2013/pt/perfil\\_m/sao-caetano-do-sul\\_sp](http://atlasbrasil.org.br/2013/pt/perfil_m/sao-caetano-do-sul_sp), accessed 20 June 2020).
- 13 Whitman JD, Hiatt J, Mowery CT, et al. Test performance evaluation of SARS-CoV-2 serological assays. medRxiv 2020; 2020.04.25.20074856.
- 14 R Core Team. R: A language and environment for statistical computing. R Foundation for Statistical Computing, Vienna, Austria. (<https://www.R-project.org/>. 2019).
- 15 Kucirka LM, Lauer SA, Laeyendecker O, Boon D, Lessler J. Variation in False-Negative Rate of Reverse Transcriptase Polymerase Chain Reaction–Based SARS-CoV-2 Tests by Time Since Exposure. *Ann Int Med* 2020; M20-1495.
- 16 To KK-W, Tsang OT-Y, Leung W-S, et al. Temporal profiles of viral load in posterior oropharyngeal saliva samples and serum antibody responses during infection by SARS-CoV-2: an observational cohort study. *Lancet Inf Dis* 2020; **20**: 565–74.
- 17 He X, Lau EHY, Wu P, et al. Temporal dynamics in viral shedding and transmissibility of COVID-19. *Nat Med* 2020; **26**: 672–5.
- 18 Vetter P, Vu DL, L’Huillier AG, Schibler M, Kaiser L, Jacquerioz F. Clinical features of covid-19. *BMJ* 2020; m1470.



- 1  
2  
3 19 T. Team, Vital Surveillances: The Epidemiological Characteristics of an Outbreak of  
4 2019 Novel Coronavirus Diseases (COVID-19)-China. *China CDC Weekly* 2020; **2**: 113–22.  
5 20 Salje H, Tran Kiem C, Lefrancq N, et al. Estimating the burden of SARS-CoV-2 in  
6 France. *Science* 2020; eabc3517.  
7 21 Verity R, Okell LC, Dorigatti I, et al. Estimates of the severity of coronavirus disease  
8 2019: a model-based analysis. *Lancet Infect Dis* 2020; **20**: 669–77.  
9 22 Worster A, Carpenter C. Incorporation bias in studies of diagnostic tests: how to  
10 avoid being biased about bias. *CJEM* 2008; **10**: 174–5.  
11 23 Macinko J, Harris MJ. Brazil's Family Health Strategy — Delivering Community-  
12 Based Primary Care in a Universal Health System. *NEJM* 2015; **372**: 2177–81.  
13  
14  
15  
16

## 17 TABLE LEGENDS

### 18 **Table 1 Demographic and clinical characteristics of 1,048 suspected COVID-19 cases** 19 **undergoing diagnostic testing in the Corona São Caetano program.** \* Security,

20 emergency services, supermarket, public transport, and pharmacy workers. IQR: interquartile  
21 range; HCW: health care workers, COPD: chronic obstructive pulmonary disease. Missing  
22 data – educational level 2; essential occupation 2; body mass index 4; cardiovascular disease  
23 28; diabetes 31 mellitus; chronic resp. disease 65; chronic kidney disease 27; COPD 28. P-  
24 values calculated by Chi-squared, Fisher exact, or Wilcoxon rank sum.  
25  
26  
27  
28  
29  
30  
31  
32

### 33 **Table 2 Characteristics of RT-PCR positive patients stratified by hospitalization status.**

34 Missing data – body mass index 2; cardiovascular disease 12; diabetes mellitus 12; chronic  
35 respiratory disease 29; COPD 11; chronic kidney disease 12; COPD - chronic obstructive  
36 pulmonary disease; IQR - interquartile range.  
37  
38  
39  
40  
41

## 42 FIGURE LEGENDS

43  
44 **Figure 1** Patient flowchart for the Corona São Caetano platform between 13<sup>th</sup> April and 13<sup>th</sup>  
45 May 2020. In the upper section (white background) the numbers correspond to individual  
46 presentations to the system; among suspected cases 2,073 suspected cases, 60 had two  
47 presentations and one had three. In the lower section (grey background) numbers correspond  
48 to individual patients making up the final analytic groups.  
49  
50  
51  
52  
53

54  
55 **Figure 2** Panel A presents prevalence (point) and exact binomial 95% confidence intervals  
56 (vertical lines) of symptoms at presentation among patients with suspected COVID-19  
57 according to RT-PCR result and serostatus (A). Panels B and C present the prevalence of  
58  
59  
60



1  
2  
3 presenting symptoms among patients with COVID-19 (RT-PCR and serology positive)  
4 stratified by age (B) and sex (C).  
5  
6  
7

8 **Figure 3** Odds ratios (black dot) and 95% confidence intervals (lines) for testing positive for  
9 COVID-19 (RT-PCR positive or serology positive) associated with the presence of each  
10 presenting symptom. Horizontal axis is on log scale. Point estimates of odds ratios are shown  
11 inline with their corresponding symptom.  
12  
13  
14

15  
16 **Figure 4** Relationship between mean RT-PCR cycle threshold (Ct) and day of illness course  
17 when the nasopharyngeal swab was collected (A), patient age (B), patient sex (C), and  
18 different symptoms at presentation. Panels A and B show the best fit linear regression lines,  
19 panels C and D are violin plots (rotated kernel density plots showing the full distribution of  
20 data) of the Ct values with median (black dot) and interquartile range (black line).  
21  
22  
23  
24  
25  
26  
27  
28  
29  
30  
31  
32  
33  
34  
35  
36  
37  
38  
39  
40  
41  
42  
43  
44  
45  
46  
47  
48  
49  
50  
51  
52  
53  
54  
55  
56  
57  
58  
59  
60

**Table 1**

|                                                                                | <b>RT-PCR +ve<br/>(G1)</b><br>N = 444<br>n (%) or median (IQR) | <b>RT-PCR -ve<br/>Sero +ve (G2)</b><br>N=52<br>n (%) or median (IQR) | <b>RT-PCR -ve<br/>Sero -ve (G3)</b><br>N = 552<br>n (%) or median (IQR) | <b>p-value<br/>G1 versus G2</b> | <b>p-value<br/>G1 versus G3</b> |
|--------------------------------------------------------------------------------|----------------------------------------------------------------|----------------------------------------------------------------------|-------------------------------------------------------------------------|---------------------------------|---------------------------------|
| <b>Sex</b>                                                                     |                                                                |                                                                      |                                                                         |                                 |                                 |
| Male                                                                           | 200 (45.0)                                                     | 23 (44.2)                                                            | 185 (33.5)                                                              | 1.0                             | <0.001                          |
| Female                                                                         | 244 (55.0)                                                     | 29 (55.8)                                                            | 367 (66.5)                                                              |                                 |                                 |
| <b>Age groups (years)</b>                                                      |                                                                |                                                                      |                                                                         |                                 |                                 |
| 10 to 19                                                                       | 29 (6.5)                                                       | 1 (1.9)                                                              | 25 (4.5)                                                                | 0.07                            | 0.40                            |
| 20 to 39                                                                       | 197 (44.4)                                                     | 17 (32.7)                                                            | 236 (42.8)                                                              |                                 |                                 |
| 40 to 59                                                                       | 158 (35.6)                                                     | 28 (53.8)                                                            | 218 (39.5)                                                              |                                 |                                 |
| 60+                                                                            | 60 (13.5)                                                      | 6 (11.5)                                                             | 73 (13.2)                                                               |                                 |                                 |
| <b>Educational level</b>                                                       |                                                                |                                                                      |                                                                         |                                 |                                 |
| Up to primary education                                                        | 75 (16.9)                                                      | 7 (13.5)                                                             | 56 (10.2)                                                               | 0.10                            | <0.001                          |
| High school                                                                    | 214 (48.3)                                                     | 19 (36.5)                                                            | 194 (35.2)                                                              |                                 |                                 |
| University                                                                     | 154 (34.8)                                                     | 26 (50.0)                                                            | 301 (54.6)                                                              |                                 |                                 |
| <b>Essential Occupation</b>                                                    |                                                                |                                                                      |                                                                         |                                 |                                 |
| Non-HCW essential job *                                                        | 137 (30.9)                                                     | 12 (23.1)                                                            | 148 (26.9)                                                              | 0.45                            | 0.01                            |
| Carers                                                                         | 10 (2.3)                                                       | 0 (0.0)                                                              | 8 (1.5)                                                                 |                                 |                                 |
| HCW                                                                            | 32 (7.2)                                                       | 5 (9.6)                                                              | 73 (13.2)                                                               |                                 |                                 |
| No                                                                             | 264 (59.6)                                                     | 35 (67.3)                                                            | 322 (58.4)                                                              |                                 |                                 |
| <b>Body mass index (kg/m<sup>2</sup>)</b>                                      |                                                                |                                                                      |                                                                         |                                 |                                 |
| <25                                                                            | 151 (34.2)                                                     | 22 (42.3)                                                            | 211 (38.4)                                                              | 0.62                            | 0.14                            |
| 25-29                                                                          | 182 (41.2)                                                     | 17 (32.7)                                                            | 187 (34.0)                                                              |                                 |                                 |
| 30-35                                                                          | 79 (17.9)                                                      | 9 (17.3)                                                             | 112 (20.4)                                                              |                                 |                                 |
| 35+                                                                            | 30 (6.8)                                                       | 4 (7.7)                                                              | 40 (7.3)                                                                |                                 |                                 |
| <b>Comorbidities</b>                                                           |                                                                |                                                                      |                                                                         |                                 |                                 |
| Cardiovascular disease                                                         | 88 (20.4)                                                      | 9 (17.6)                                                             | 129 (24.0)                                                              | 0.89                            | 0.40                            |
| Diabetes mellitus                                                              | 48 (11.1)                                                      | 4 (7.8)                                                              | 39 (7.3)                                                                | 0.86                            | 0.12                            |
| Any chronic resp. disease                                                      | 37 (8.9)                                                       | 9 (18.0)                                                             | 79 (15.3)                                                               | 0.13                            | 0.01                            |
| COPD                                                                           | 24 (5.5)                                                       | 5 (9.8)                                                              | 54 (10.1)                                                               | 0.47                            | 0.03                            |
| Chronic kidney disease                                                         | 1 (<1)                                                         | 0 (0.0)                                                              | 3 (1.0)                                                                 | 1.0                             | 0.83                            |
| <b>Time from symptom<br/>onset to swab collection<br/>(days), median (IQR)</b> |                                                                |                                                                      |                                                                         |                                 |                                 |
|                                                                                | 5.0 (4.0-7.0)                                                  | 6.0 (4.0-8.3)                                                        | 6.0 (4.0-9.0)                                                           | 0.06                            | <0.001                          |

**Table 2**

|                                           | <b>Hospitalized</b><br>n=30<br>n (%) or median (IQR) | <b>Not hospitalized</b><br>n=414<br>n (%) or median (IQR) | <b>p-value</b> |
|-------------------------------------------|------------------------------------------------------|-----------------------------------------------------------|----------------|
| <b>Age (years)</b>                        |                                                      |                                                           |                |
| 10 to 19                                  | 1 (3)                                                | 28 (97)                                                   |                |
| 20 to 39                                  | 6 (3)                                                | 191 (97)                                                  |                |
| 40 to 59                                  | 14 (9)                                               | 144 (91)                                                  |                |
| 60+                                       | 9 (15)                                               | 51 (85)                                                   | 0.006          |
| <b>Sex</b>                                |                                                      |                                                           |                |
| Female                                    | 16 (7)                                               | 228 (93)                                                  |                |
| Male                                      | 14 (7)                                               | 186 (93)                                                  | 0.852          |
| <b>Comorbidities</b>                      |                                                      |                                                           |                |
| Cardiovascular disease                    | 11 (13)                                              | 77 (87)                                                   | 0.001          |
| Diabetes mellitus                         | 8 (17)                                               | 40 (83)                                                   | 0.007          |
| Any chronic resp. disease                 | 2 (5)                                                | 35 (95)                                                   | 1.0            |
| COPD                                      | 1 (5)                                                | 23 (95)                                                   | 1.0            |
| Chronic kidney disease                    | 1 (100)                                              | 0 (0)                                                     | 0.06           |
| <b>Body mass index (Kg/m<sup>2</sup>)</b> |                                                      |                                                           |                |
| <25                                       | 4 (3)                                                | 147 (97)                                                  |                |
| 25-29                                     | 8 (4)                                                | 174 (96)                                                  |                |
| 30-35                                     | 12 (15)                                              | 67 (85)                                                   |                |
| 35+                                       | 6 (20)                                               | 24 (80)                                                   | <0.001         |
| <b>Time to presentation (days)</b>        | 3 (3 to 4)                                           | 4 (3 to 5)                                                | 0.072          |

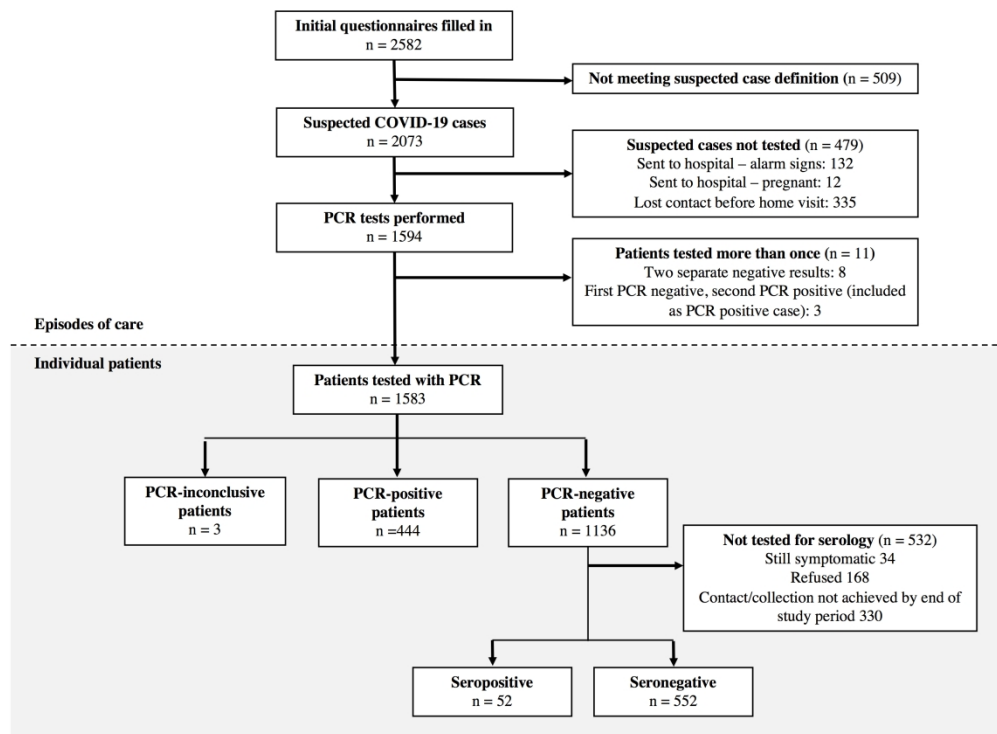

Figure 1

246x181mm (300 x 300 DPI)

1  
2  
3  
4  
5  
6  
7  
8  
9  
10  
11  
12  
13  
14  
15  
16  
17  
18  
19  
20  
21  
22  
23  
24  
25  
26  
27  
28  
29  
30  
31  
32  
33  
34  
35  
36  
37  
38  
39  
40  
41  
42  
43  
44  
45  
46  
47  
48  
49  
50  
51  
52  
53  
54  
55  
56  
57  
58  
59  
60

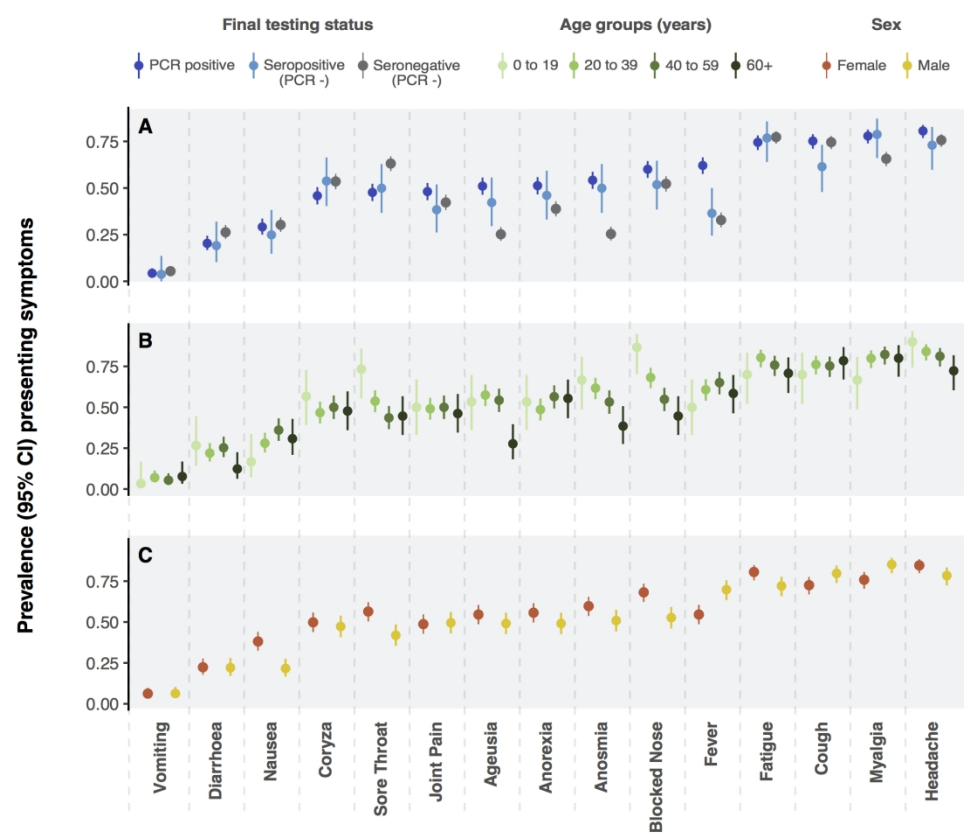

Figure 2

187x158mm (300 x 300 DPI)

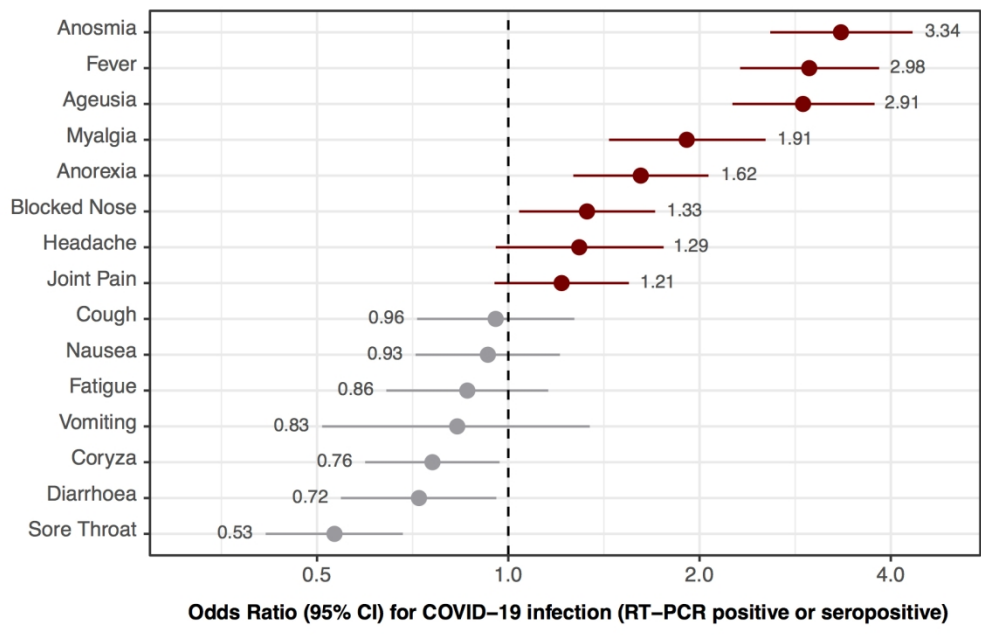

Figure 3

154x100mm (300 x 300 DPI)

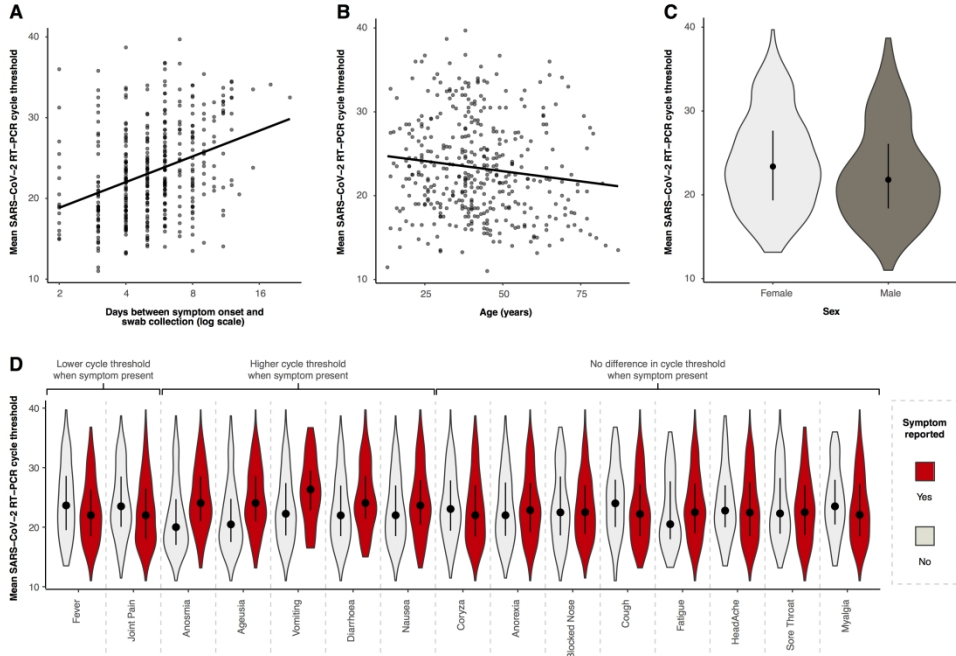

Figure 4

327x222mm (300 x 300 DPI)

## Supplemental material

### Initial risk assessment

Patients meeting the definition of a suspected case were called by a medical student (under supervision) to complete a risk assessment. All patients were asked a set of standardized questions:

- Do you feel short of breath?
- Are you breathing quickly or finding it difficult to breath?
- If yes, can you count your respiratory rate over one minute? (respiratory rate >20 breaths/minute was considered tachypnoea)
- Has your fever worsened over the last 3 days or have you had a new fever after 2 days being fever-free?
- Have you felt confused or lethargic?

If the patient answered “yes” to any of these questions they were advised to attend a specialist health service. Among the 132 patients that were triaged to hospital, 76 (58% of 132) had shortness of breath, 76 (58% of 132) reported rapid breathing, 33 (25% of 132) persistent fever and 22 (17% of 132) altered mental status.



**Table S1 Univariable and adjusted associations between RT-PCR cycle thresholds and patient characteristics**

|                                                                      | Unadjusted analysis        |                         | Adjusted analysis *        |                         |
|----------------------------------------------------------------------|----------------------------|-------------------------|----------------------------|-------------------------|
|                                                                      | Beta (difference in means) | 95% Confidence interval | Beta (difference in means) | 95% Confidence interval |
| Age (years)                                                          | <b>-0.05</b>               | <b>-0.09 to -0.01</b>   | <b>-0.06</b>               | <b>-0.09 to -0.03</b>   |
| Male sex                                                             | <b>-1.36</b>               | <b>-2.49 to -0.23</b>   | -1.05                      | -2.09 to <0.001         |
| Days from symptom onset to swab collection (days, log <sub>2</sub> ) | <b>3.28</b>                | <b>2.33 to 4.03</b>     | <b>3.27</b>                | <b>0.42 to 7.70</b>     |
| PCR platform (ALTONA as reference)                                   | <b>-1.19</b>               | <b>-2.37 to -0.02</b>   | <b>-1.53</b>               | <b>-2.6 to -0.45</b>    |
| <b>Symptoms at presentation</b>                                      |                            |                         |                            |                         |
| Fever                                                                | <b>-1.78</b>               | <b>-2.96 to -0.59</b>   | <b>-1.11</b>               | <b>-2.11 to -0.001</b>  |
| Myalgia                                                              | -1.31                      | -2.75 to 0.12           | -0.78                      | -2.11 to 0.53           |
| Arthralgia                                                           | <b>-1.64</b>               | <b>-2.77 to -0.52</b>   | <b>-1.24</b>               | <b>-2.18 to -0.10</b>   |
| Anosmia                                                              | <b>3.15</b>                | <b>2.04 to 4.25</b>     | <b>2.21</b>                | <b>1.0 to 3.29</b>      |
| Agusia                                                               | <b>2.99</b>                | <b>1.89 to 4.09</b>     | <b>1.96</b>                | <b>0.88 to 3.0</b>      |
| Diarrhea                                                             | <b>2.19</b>                | <b>0.84 to 3.53</b>     | <b>1.36</b>                | <b>0.12 to 2.61</b>     |
| Nausea                                                               | <b>1.50</b>                | <b>0.28 to 2.72</b>     | 1.09                       | -0.04 to 2.24           |
| Vomiting                                                             | <b>2.99</b>                | <b>0.52 to 5.46</b>     | 2.02                       | -0.28 to 4.33           |
| Anorexia                                                             | 0.56                       | -0.57 to 1.70           | 0.47                       | -0.58 to 1.51           |
| Headache                                                             | -0.58                      | -2.12 to 0.97           | -0.81                      | -2.25 to 0.63           |
| Fatigue                                                              | 0.84                       | -0.50 to 2.18           | 0.34                       | -0.91 to 1.59           |
| Coryza                                                               | -0.78                      | -1.92 to 0.34           | -0.68                      | -1.72 to 0.34           |
| Blocked nose                                                         | -0.36                      | -1.53 to 0.81           | <b>-1.48</b>               | <b>-2.59 to -0.37</b>   |
| Cough                                                                | -1.33                      | -2.70 to 0.03           | <b>-1.60</b>               | <b>-2.86 to -0.33</b>   |
| Sore throat                                                          | -0.49                      | -1.62 to 0.64           | -0.45                      | -1.52 to 0.61           |

\* All variables adjusted for age (continuous in years), sex (female as reference group), PCR platform (ALTONA platform as the reference group) and time between symptom onset and swab collection (log base 2). Analysis was performed within a linear regression framework. Positive beta coefficients indicate higher cycle thresholds (lower viral load) associated with that variable, whereas negative beta coefficients indicate lower cycle thresholds when the variable is present. Results in bold reached statistical significance.

## Supplemental figure legends

**Figure S1** Comparison of cycle thresholds across PCR platforms and genes amplified. Upper two panels show the concordance between cycle thresholds for the two separate genes amplified by the ALTONA (left) and Mico Biomed (right) kits. Lower left panel – distribution of cycle thresholds by gene amplified and RT-PCR platform used. Lower right-hand panel – distribution of the mean cycle threshold (mean of cycle thresholds for separate genes) between different RT-PCR platforms.

**Figure S2** Time series of presentations to the Corona São Caetano platform. Dashed vertical lines denote the weekends with a reduced number of presentations. Thick black line corresponds to the right-hand y-axis: proportion of RT-PCRs performed with positive result.

**Figure S3** Age-sex distribution the city of São Caetano do Sul compared with that of patients accessing the Corona São Caetano system and being tested with RT-PCR (left-hand panel) and those testing positive for SARS-CoV-2 (right-hand panel).

**Figure S4** Distribution of delay between symptom onset and swab collection among 444 RT-PCR-positive patients and 52 RT-PCR-negative patients that subsequently tested seropositive (left-hand panel). Histogram of delay between symptom onset and swab collection among patients with COVID-19 (right-hand panel).

**Figure S5** Left hand figures show symptoms at each follow-up questionnaire among patients testing RT-PCR positive and undergoing follow-up. Individual patients are stacked on the y-axis ordered according to the delay from symptom onset to presentation. Each point represents the response to a questionnaire and its position on the horizontal axis the time after symptom onset that the questionnaire was filled in. Grey points are questionnaires where the patient denied the presence of a given symptom. The coloured points correspond to questionnaires in which the patient reported a given symptom. The right-hand figures results from grouping the horizontal axis time into two-day windows and calculating the proportion of completed questionnaires in which each symptom was reported. The denominators for the horizontal axis groups (number of questionnaires completed within a given time window from symptom onset) are 104 at [0-2] days, 192 at (2-4], 185 at (4-6], 293 at (6-8], 338 at (8-10], 329 at (10-12], 335 at (12-14], 324 at (14-16], 280 at (16-18] and 201 at (18-20].

1  
2  
3  
4  
5  
6  
7  
8  
9  
10  
11  
12  
13  
14  
15  
16  
17  
18  
19  
20  
21  
22  
23  
24  
25  
26  
27  
28  
29  
30  
31  
32  
33  
34  
35  
36  
37  
38  
39  
40  
41  
42  
43  
44  
45  
46  
47  
48  
49  
50  
51  
52  
53  
54  
55  
56  
57  
58  
59  
60

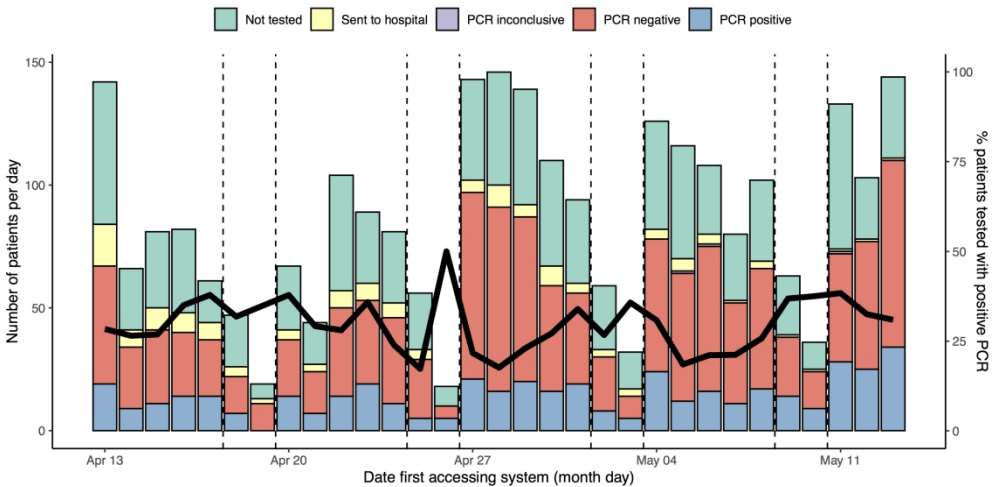

Figure S2

254x127mm (300 x 300 DPI)

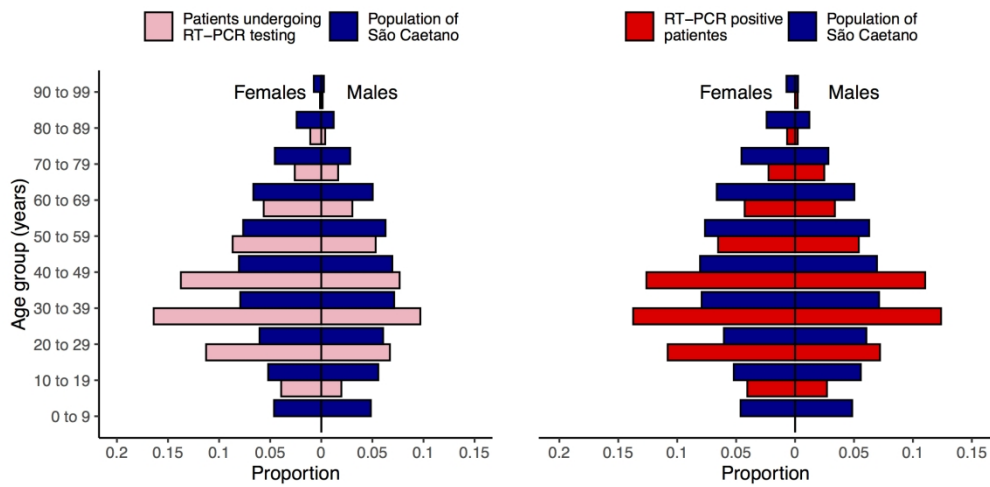

Figure S3

203x101mm (300 x 300 DPI)

1  
2  
3  
4  
5  
6  
7  
8  
9  
10  
11  
12  
13  
14  
15  
16  
17  
18  
19  
20  
21  
22  
23  
24  
25  
26  
27  
28  
29  
30  
31  
32  
33  
34  
35  
36  
37  
38  
39  
40  
41  
42  
43  
44  
45  
46  
47  
48  
49  
50  
51  
52  
53  
54  
55  
56  
57  
58  
59  
60

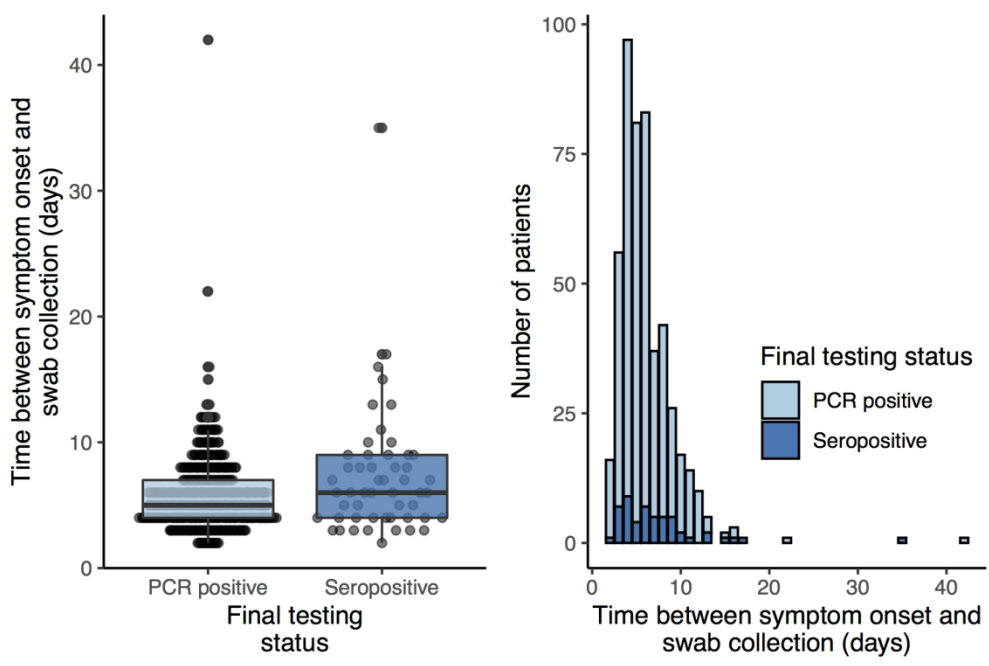

Figure S4

152x101mm (300 x 300 DPI)

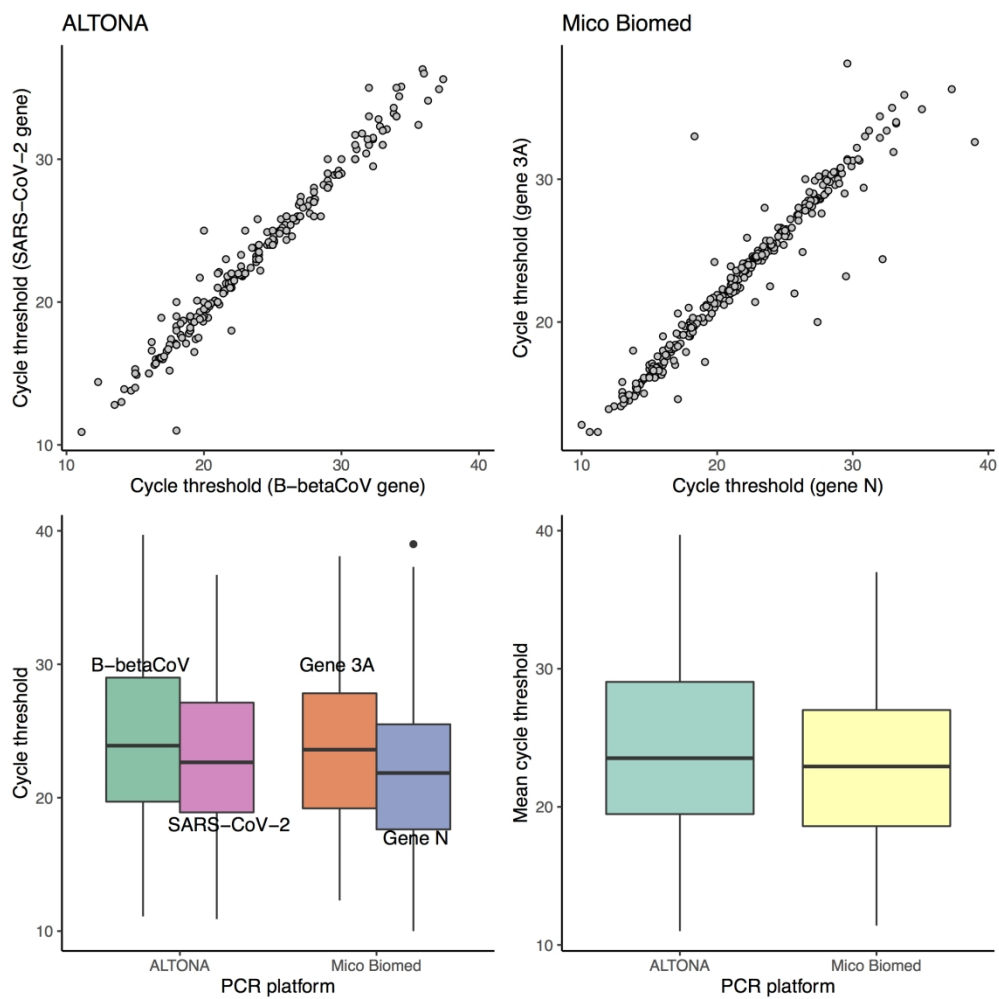

Figure S1

203x203mm (300 x 300 DPI)

1  
2  
3  
4  
5  
6  
7  
8  
9  
10  
11  
12  
13  
14  
15  
16  
17  
18  
19  
20  
21  
22  
23  
24  
25  
26  
27  
28  
29  
30  
31  
32  
33  
34  
35  
36  
37  
38  
39  
40  
41  
42  
43  
44  
45  
46  
47  
48  
49  
50  
51  
52  
53  
54  
55  
56  
57  
58  
59  
60

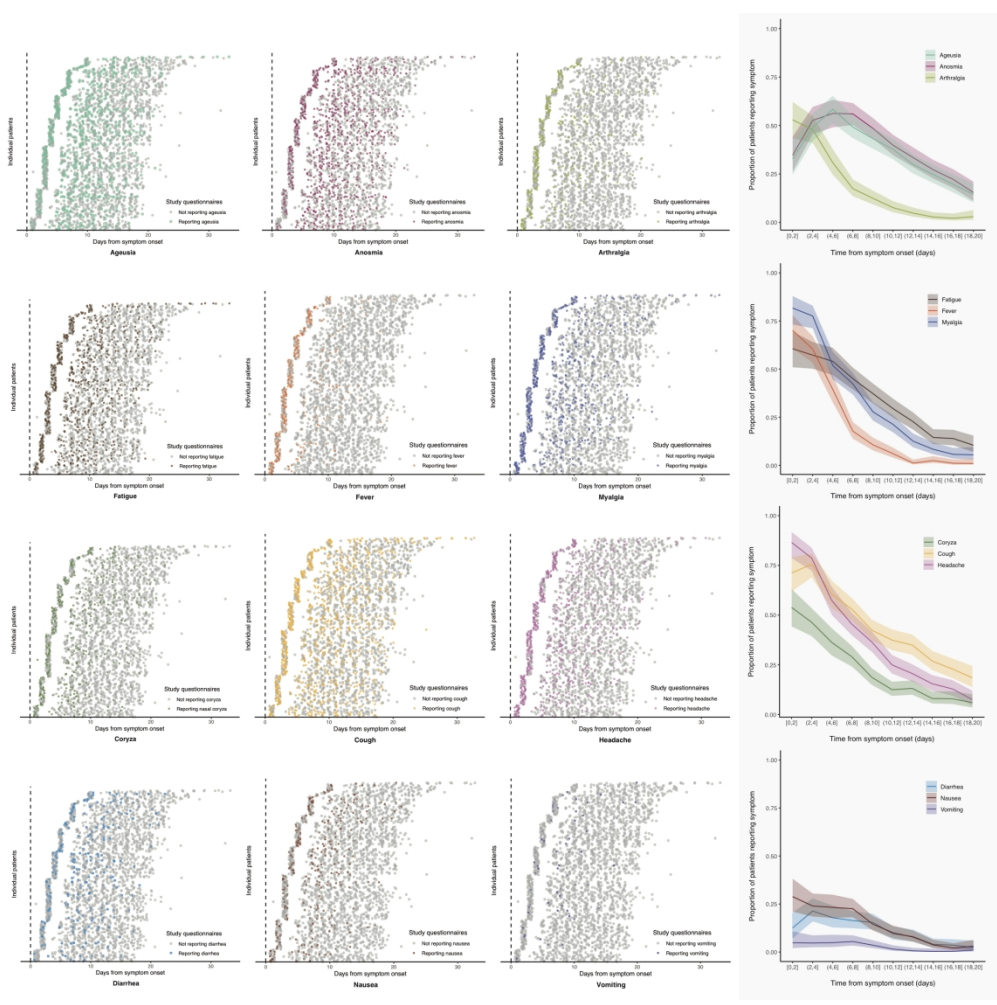

Figure S5

433x427mm (150 x 150 DPI)

STROBE Statement—Checklist of items that should be included in reports of *cohort studies*

|                              | Item No | Recommendation                                                                                                                                                                                                                                                                                                         | Page No                                                                     |
|------------------------------|---------|------------------------------------------------------------------------------------------------------------------------------------------------------------------------------------------------------------------------------------------------------------------------------------------------------------------------|-----------------------------------------------------------------------------|
| <b>Title and abstract</b>    | 1       | (a) Indicate the study's design with a commonly used term in the title or the abstract<br>(b) Provide in the abstract an informative and balanced summary of what was done and what was found                                                                                                                          | 1 and 2                                                                     |
| <b>Introduction</b>          |         |                                                                                                                                                                                                                                                                                                                        |                                                                             |
| Background/rationale         | 2       | Explain the scientific background and rationale for the investigation being reported                                                                                                                                                                                                                                   | 4                                                                           |
| Objectives                   | 3       | State specific objectives, including any prespecified hypotheses                                                                                                                                                                                                                                                       | 4                                                                           |
| <b>Methods</b>               |         |                                                                                                                                                                                                                                                                                                                        |                                                                             |
| Study design                 | 4       | Present key elements of study design early in the paper                                                                                                                                                                                                                                                                | 5 to 7                                                                      |
| Setting                      | 5       | Describe the setting, locations, and relevant dates, including periods of recruitment, exposure, follow-up, and data collection                                                                                                                                                                                        | 5 to 6                                                                      |
| Participants                 | 6       | (a) Give the eligibility criteria, and the sources and methods of selection of participants. Describe methods of follow-up<br>(b) For matched studies, give matching criteria and number of exposed and unexposed                                                                                                      | A – 5<br>B - NA                                                             |
| Variables                    | 7       | Clearly define all outcomes, exposures, predictors, potential confounders, and effect modifiers. Give diagnostic criteria, if applicable                                                                                                                                                                               | 7 to 8                                                                      |
| Data sources/<br>measurement | 8*      | For each variable of interest, give sources of data and details of methods of assessment (measurement). Describe comparability of assessment methods if there is more than one group                                                                                                                                   | 5 to 7                                                                      |
| Bias                         | 9       | Describe any efforts to address potential sources of bias                                                                                                                                                                                                                                                              | 7 to 8                                                                      |
| Study size                   | 10      | Explain how the study size was arrived at                                                                                                                                                                                                                                                                              | 8                                                                           |
| Quantitative variables       | 11      | Explain how quantitative variables were handled in the analyses. If applicable, describe which groupings were chosen and why                                                                                                                                                                                           |                                                                             |
| Statistical methods          | 12      | (a) Describe all statistical methods, including those used to control for confounding<br>(b) Describe any methods used to examine subgroups and interactions<br>(c) Explain how missing data were addressed<br>(d) If applicable, explain how loss to follow-up was addressed<br>(e) Describe any sensitivity analyses | A – 7 to 8<br>B – NA<br>C – 8<br>D – NA<br>E – NA                           |
| <b>Results</b>               |         |                                                                                                                                                                                                                                                                                                                        |                                                                             |
| Participants                 | 13*     | (a) Report numbers of individuals at each stage of study—eg numbers potentially eligible, examined for eligibility, confirmed eligible, included in the study, completing follow-up, and analysed<br>(b) Give reasons for non-participation at each stage<br>(c) Consider use of a flow diagram                        | Figure 1<br>and page<br>9                                                   |
| Descriptive data             | 14*     | (a) Give characteristics of study participants (eg demographic, clinical, social) and information on exposures and potential confounders<br>(b) Indicate number of participants with missing data for each variable of interest                                                                                        | A – table<br>1 and<br>pages<br>9to10<br><br>B - Table<br>1 and 2<br>legends |



|                          |     |                                                                                                                                                                                                                                                                                                                                                                                                               |                                     |
|--------------------------|-----|---------------------------------------------------------------------------------------------------------------------------------------------------------------------------------------------------------------------------------------------------------------------------------------------------------------------------------------------------------------------------------------------------------------|-------------------------------------|
|                          |     | (c) Summarise follow-up time (eg, average and total amount)                                                                                                                                                                                                                                                                                                                                                   | C – page<br>9                       |
| Outcome data             | 15* | Report numbers of outcome events or summary measures over time                                                                                                                                                                                                                                                                                                                                                | 11                                  |
| Main results             | 16  | (a) Give unadjusted estimates and, if applicable, confounder-adjusted estimates and their precision (eg, 95% confidence interval). Make clear which confounders were adjusted for and why they were included<br>(b) Report category boundaries when continuous variables were categorized<br>(c) If relevant, consider translating estimates of relative risk into absolute risk for a meaningful time period | Page 7<br>and<br>results<br>section |
| Other analyses           | 17  | Report other analyses done—eg analyses of subgroups and interactions, and sensitivity analyses                                                                                                                                                                                                                                                                                                                | NA                                  |
| <b>Discussion</b>        |     |                                                                                                                                                                                                                                                                                                                                                                                                               |                                     |
| Key results              | 18  | Summarise key results with reference to study objectives                                                                                                                                                                                                                                                                                                                                                      | 12                                  |
| Limitations              | 19  | Discuss limitations of the study, taking into account sources of potential bias or imprecision. Discuss both direction and magnitude of any potential bias                                                                                                                                                                                                                                                    | 13                                  |
| Interpretation           | 20  | Give a cautious overall interpretation of results considering objectives, limitations, multiplicity of analyses, results from similar studies, and other relevant evidence                                                                                                                                                                                                                                    | 13                                  |
| Generalisability         | 21  | Discuss the generalisability (external validity) of the study results                                                                                                                                                                                                                                                                                                                                         | 13                                  |
| <b>Other information</b> |     |                                                                                                                                                                                                                                                                                                                                                                                                               |                                     |
| Funding                  | 22  | Give the source of funding and the role of the funders for the present study and, if applicable, for the original study on which the present article is based                                                                                                                                                                                                                                                 | 14                                  |

\*Give information separately for exposed and unexposed groups.

**Note:** An Explanation and Elaboration article discusses each checklist item and gives methodological background and published examples of transparent reporting. The STROBE checklist is best used in conjunction with this article (freely available on the Web sites of PLoS Medicine at <http://www.plosmedicine.org/>, Annals of Internal Medicine at <http://www.annals.org/>, and Epidemiology at <http://www.epidem.com/>). Information on the STROBE Initiative is available at <http://www.strobe-statement.org>.

# BMJ Open

## Clinical features and natural history of the first 2,073 suspected COVID-19 cases in the Corona São Caetano primary care programme: a prospective cohort study

|                                 |                                                                                                                                                                                                                                                                                                                                                                                                                                                                                                                                                                                                                                                                                                                                                                                                                                                                                                                                                                                                                                                                                                                                                                                                                                                                                                                                                                                                                                                                                                                                                                                                                                                                                                                                                                                                                                                                                                                                                                                                   |
|---------------------------------|---------------------------------------------------------------------------------------------------------------------------------------------------------------------------------------------------------------------------------------------------------------------------------------------------------------------------------------------------------------------------------------------------------------------------------------------------------------------------------------------------------------------------------------------------------------------------------------------------------------------------------------------------------------------------------------------------------------------------------------------------------------------------------------------------------------------------------------------------------------------------------------------------------------------------------------------------------------------------------------------------------------------------------------------------------------------------------------------------------------------------------------------------------------------------------------------------------------------------------------------------------------------------------------------------------------------------------------------------------------------------------------------------------------------------------------------------------------------------------------------------------------------------------------------------------------------------------------------------------------------------------------------------------------------------------------------------------------------------------------------------------------------------------------------------------------------------------------------------------------------------------------------------------------------------------------------------------------------------------------------------|
| Journal:                        | <i>BMJ Open</i>                                                                                                                                                                                                                                                                                                                                                                                                                                                                                                                                                                                                                                                                                                                                                                                                                                                                                                                                                                                                                                                                                                                                                                                                                                                                                                                                                                                                                                                                                                                                                                                                                                                                                                                                                                                                                                                                                                                                                                                   |
| Manuscript ID                   | bmjopen-2020-042745.R1                                                                                                                                                                                                                                                                                                                                                                                                                                                                                                                                                                                                                                                                                                                                                                                                                                                                                                                                                                                                                                                                                                                                                                                                                                                                                                                                                                                                                                                                                                                                                                                                                                                                                                                                                                                                                                                                                                                                                                            |
| Article Type:                   | Original research                                                                                                                                                                                                                                                                                                                                                                                                                                                                                                                                                                                                                                                                                                                                                                                                                                                                                                                                                                                                                                                                                                                                                                                                                                                                                                                                                                                                                                                                                                                                                                                                                                                                                                                                                                                                                                                                                                                                                                                 |
| Date Submitted by the Author:   | 11-Nov-2020                                                                                                                                                                                                                                                                                                                                                                                                                                                                                                                                                                                                                                                                                                                                                                                                                                                                                                                                                                                                                                                                                                                                                                                                                                                                                                                                                                                                                                                                                                                                                                                                                                                                                                                                                                                                                                                                                                                                                                                       |
| Complete List of Authors:       | <p>Leal, Fabio ; Universidade Municipal de São Caetano do Sul; Instituto Nacional de Cancer</p> <p>Mendes-Correa, Maria; Universidade de São Paulo, Instituto de Medicina Tropical (LIM-52, LIM-46, LIM-49) and Departamento de Moléstias Infecciosas e Parasitarias</p> <p>Buss, Lewis; Universidade de São Paulo, Instituto de Medicina Tropical (LIM-52, LIM-46, LIM-49) and Departamento de Moléstias Infecciosas e Parasitarias</p> <p>Costa, Silvia; Universidade de São Paulo, Instituto de Medicina Tropical (LIM-52, LIM-46, LIM-49) and Departamento de Moléstias Infecciosas e Parasitarias</p> <p>Bizarro, Joao; Universidade Municipal de São Caetano do Sul</p> <p>de Souza, Sonia ; Universidade Municipal de São Caetano do Sul</p> <p>Thomaz, Osorio; Instituto de Pesquisas Tecnológicas</p> <p>Tozetto-Mendoza, Tania; Universidade de São Paulo, Instituto de Medicina Tropical (LIM-52, LIM-46, LIM-49) and Departamento de Moléstias Infecciosas e Parasitarias</p> <p>Villas-Boas, Lucy; Universidade de São Paulo, Instituto de Medicina Tropical (LIM-52, LIM-46, LIM-49) and Departamento de Moléstias Infecciosas e Parasitarias</p> <p>Oliveira, Lea; Universidade de São Paulo, Instituto de Medicina Tropical (LIM-52, LIM-46, LIM-49) and Departamento de Moléstias Infecciosas e Parasitarias</p> <p>Grespan, Regina; Universidade Municipal de São Caetano do Sul</p> <p>Capuani, Ligia; Modular Research System</p> <p>Buccheri, Renata; Universidade de São Paulo, Instituto de Medicina Tropical (LIM-52, LIM-46, LIM-49) and Departamento de Moléstias Infecciosas e Parasitarias</p> <p>Domingues, Helves; Modular Research System</p> <p>Alexander, Neal; London School of Hygiene &amp; Tropical Medicine</p> <p>Mayaud, Philippe; London School of Hygiene &amp; Tropical Medicine</p> <p>Sabino, Ester; Universidade de São Paulo, Instituto de Medicina Tropical (LIM-52, LIM-46, LIM-49) and Departamento de Moléstias Infecciosas e Parasitarias</p> |
| <b>Primary Subject Heading</b>: | Infectious diseases                                                                                                                                                                                                                                                                                                                                                                                                                                                                                                                                                                                                                                                                                                                                                                                                                                                                                                                                                                                                                                                                                                                                                                                                                                                                                                                                                                                                                                                                                                                                                                                                                                                                                                                                                                                                                                                                                                                                                                               |
| Secondary Subject Heading:      | Epidemiology, Public health, Global health                                                                                                                                                                                                                                                                                                                                                                                                                                                                                                                                                                                                                                                                                                                                                                                                                                                                                                                                                                                                                                                                                                                                                                                                                                                                                                                                                                                                                                                                                                                                                                                                                                                                                                                                                                                                                                                                                                                                                        |

1  
2  
3  
4  
5  
6  
7  
8  
9  
10  
11  
12  
13  
14  
15  
16  
17  
18  
19  
20  
21  
22  
23  
24  
25  
26  
27  
28  
29  
30  
31  
32  
33  
34  
35  
36  
37  
38  
39  
40  
41  
42  
43  
44  
45  
46  
47  
48  
49  
50  
51  
52  
53  
54  
55  
56  
57  
58  
59  
60

|           |                                                                                    |
|-----------|------------------------------------------------------------------------------------|
| Keywords: | PRIMARY CARE, Epidemiology < TROPICAL MEDICINE, INFECTIOUS DISEASES, PUBLIC HEALTH |
|           |                                                                                    |

SCHOLARONE™  
Manuscripts

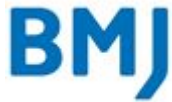

I, the Submitting Author has the right to grant and does grant on behalf of all authors of the Work (as defined in the below author licence), an exclusive licence and/or a non-exclusive licence for contributions from authors who are: i) UK Crown employees; ii) where BMJ has agreed a CC-BY licence shall apply, and/or iii) in accordance with the terms applicable for US Federal Government officers or employees acting as part of their official duties; on a worldwide, perpetual, irrevocable, royalty-free basis to BMJ Publishing Group Ltd ("BMJ") its licensees and where the relevant Journal is co-owned by BMJ to the co-owners of the Journal, to publish the Work in this journal and any other BMJ products and to exploit all rights, as set out in our [licence](#).

The Submitting Author accepts and understands that any supply made under these terms is made by BMJ to the Submitting Author unless you are acting as an employee on behalf of your employer or a postgraduate student of an affiliated institution which is paying any applicable article publishing charge ("APC") for Open Access articles. Where the Submitting Author wishes to make the Work available on an Open Access basis (and intends to pay the relevant APC), the terms of reuse of such Open Access shall be governed by a Creative Commons licence – details of these licences and which [Creative Commons](#) licence will apply to this Work are set out in our licence referred to above.

Other than as permitted in any relevant BMJ Author's Self Archiving Policies, I confirm this Work has not been accepted for publication elsewhere, is not being considered for publication elsewhere and does not duplicate material already published. I confirm all authors consent to publication of this Work and authorise the granting of this licence.

1  
2  
3 **Clinical features and natural history of the first 2,073 suspected COVID-19 cases in the**  
4 **Corona São Caetano primary care programme: a prospective cohort study**  
5  
6  
7

8 Fabio E Leal<sup>1,2\*</sup> (PhD), Maria C Mendes-Correa<sup>3\*</sup> (PhD), Lewis F Buss<sup>3\*#</sup> (MBBS), Silvia  
9 F Costa<sup>3</sup> (PhD), Joao CS Bizario<sup>1</sup> (PhD), Sonia RP de Souza<sup>1</sup> (PhD), Osorio Thomaz<sup>4</sup> (PhD),  
10 Tania R Tozetto-Mendoza<sup>1</sup> (PhD), Lucy S Villas-Boas<sup>3</sup>, Lea CO Silva<sup>3</sup> (PhD), Regina MZ  
11 Grespan (MD)<sup>1</sup>, Ligia Capuani<sup>5</sup> (PhD), Renata Buccheri<sup>3</sup> (MD), Helves Domingues (PhD)<sup>5</sup>,  
12 Neal DE Alexander<sup>6</sup> (PhD), Philippe Mayaud<sup>6</sup> (MD), Ester C Sabino<sup>3</sup> (PhD)  
13  
14  
15  
16  
17

18 \* These authors contributed equally  
19  
20  
21

22 **Affiliations**  
23

- 24 1. Universidade Municipal de São Caetano do Sul (USCS), Rua Santo Antonio, São  
25 Caetano do Sul, Brazil
- 26 2. National Cancer Institute (INCA), Praça Cruz Vermelha, Rio de Janeiro, Brazil
- 27 3. Instituto de Medicina Tropical (LIM-52, LIM-46, LIM-49) and Departamento de  
28 Moléstias Infecciosas e Parasitarias da Faculdade de Medicina da Universidade de São  
29 Paulo Avenida Dr. Enéas Carvalho de Aguiar, São Paulo, Brazil
- 30 4. Instituto de Pesquisas Tecnológicas do Estado de São Paulo - IPT
- 31 5. Modular Research System, Avenida Paulista, São Paulo, Brazil
- 32 6. London School of Hygiene and Tropical Medicine (LSHTM), Keppel Street, London,  
33 United Kingdom  
34  
35  
36  
37  
38  
39  
40  
41  
42

43 **Corresponding author:**

44 # Dr Lewis F Buss

45 Instituto de Medicina Tropical da Faculdade de Medicina da Universidade de São Paulo

46 [lewisbuss@usp.br](mailto:lewisbuss@usp.br)  
47  
48  
49  
50  
51  
52

53 KEY WORDS: SARS-CoV-2, COVID-19, pandemic, community, primary care, Brazil  
54  
55  
56  
57  
58  
59  
60

## ABSTRACT

**Background:** Despite most cases not requiring hospital care, there are limited community-based clinical data on COVID-19.

**Methods:** The Corona São Caetano program is a primary care initiative providing care to all residents with COVID-19 in São Caetano do Sul, Brazil. It was designed to capture standardised clinical data on community COVID-19 cases. After triage of potentially severe cases, consecutive patients presenting to a multimedia screening platform between 13th April and 13th May 2020 were tested at home with SARS-CoV-2 reverse transcriptase (RT) PCR; positive patients were followed up for 14 days with phone calls every 2 days. RT-PCR-negative patients were offered additional SARS-CoV-2 serology testing to establish their infection status. We describe the clinical, virologic and natural history features of this prospective population-based cohort.

**Findings:** Of 2,073 suspected COVID-19 cases, 1,583 (76.4%) were tested by RT-PCR, of whom 444 (28.0%, 95%CI: 25.9-30.3) were positive; 604/1,136 (53%) RT-PCR-negative patients underwent serology, of whom 52 (8.6%) tested SARS-CoV-2 seropositive. The most common symptoms of confirmed COVID-19 were cough, fatigue, myalgia and headache; whereas self-reported fever (OR 3.0, 95%CI: 2.4-3.9), anosmia (OR 3.3, 95%CI: 2.6-4.4), and ageusia (2.9, 95%CI: 2.3-3.8) were most strongly associated with a positive COVID-19 diagnosis by RT-PCR or serology. RT-PCR cycle thresholds were lower in men, older patients, those with fever and arthralgia, and closer to symptom onset. The rates of hospitalization and death among 444 RT-PCR-positive cases were 6.7% and 0.7%, respectively, with older age and obesity more frequent in the hospitalized group.

**Conclusion:** COVID-19 presents in a similar way to other mild community-acquired respiratory diseases, but the presence of fever, anosmia, and ageusia can assist the specific diagnosis. Most patients recovered without requiring hospitalization with a low fatality rate compared to other hospital-based studies.

### Strengths and limitations of this study

1. The clinical features of COVID-19 have mostly been described in hospital-based studies which are biased towards severe disease
2. We report a prospective cohort of suspected and confirmed COVID-19 cases from a primary care initiative in the Brazilian municipality of São Caetano do Sul
3. By systematically testing consecutive suspected community cases with molecular and serological tests we were able to address the diagnostic value of clinical features of mild-moderate COVID-19 in primary care
4. Prospective follow-up of confirmed cases and linkage with hospital datasets allowed us to describe the natural history of a primary care COVID-19 population
5. A limitation of the work was that not all PCR-negative participants underwent serology testing due to loss to follow-up

## INTRODUCTION

A comprehensive public health response is vital but difficult to achieve during an epidemic. The COVID-19 pandemic, caused by the novel severe acute respiratory syndrome coronavirus 2 (SARS-CoV-2), started in China in late 2019.<sup>1</sup> According to the World Health Organization (WHO)<sup>2,3</sup> and others<sup>4,5</sup>, the ideal early response should have been multipronged, with identification, isolation, treatment and contact tracing of symptomatic cases, relying on a strong testing programme. Primary health care is well placed to implement such a response, by identifying cases early and managing them in a way that minimizes overcrowding of emergency rooms and intensive care units.<sup>6,7</sup> Real-time data analysis coming from these primary care response systems can inform policy decisions.

Primary health care (PHC) in Brazil is provided by the publicly funded Unified Health System (SUS – Portuguese acronym) within the family health strategy (*Estratégia Saúde da Família*). Provision of care is centred around a healthcare unit with a multi-professional team that is responsible for all residents in the immediate catchment area<sup>8</sup>. Nearly two-thirds of the Brazilian population is covered by the family health strategy<sup>8</sup>.

In Brazil, the first case of COVID-19 was identified in the city of São Paulo on 26<sup>th</sup> February 2020.<sup>9</sup> As of 15<sup>th</sup> June 2020 there were 1,400,000 cases nationally, with São Paulo contributing a fifth of these.<sup>10</sup> In March 2020, the Municipal Health Department of the municipality of São Caetano do Sul – part of the Greater Metropolitan Region of São Paulo – began to develop a clinical and testing platform to organize its COVID-19 response. The aim was to provide universal detection and management of symptomatic cases and their contacts. The platform was developed in partnership with two local universities – the Municipal University of São Caetano do Sul (USCS) and the University of Sao Paulo (USP) – and called “Corona São Caetano”.

Large scale community-based observational cohorts are difficult to establish under epidemic circumstances, particularly if the risk of exposure for research personnel is high. Hence, most COVID-19 epidemiological and clinical studies have been hospital-based,<sup>11-13</sup> and therefore tend to include more severe cases whose findings may not be generalizable to the general population<sup>14</sup>, although some limited descriptions from ambulatory settings are available<sup>15-17</sup>.



1  
2  
3 The objectives of this study were to describe the epidemiological indicators of the early phase  
4 of the programme rollout; and to describe the clinical, virological and natural history features  
5 (including hospitalization and deaths) of SARS-CoV-2 infection among patients identified in  
6 primary care.  
7  
8  
9

## 10 11 **METHODS**

### 12 13 14 15 **Setting**

16  
17  
18 The municipality of São Caetano do Sul has a population of 161,000 inhabitants.<sup>18</sup> The city's  
19 population is older than the Brazilian population<sup>18</sup> and its Human Development Index is one  
20 of the highest in the country. Nearly all (97.4%) children aged 6-14 are in education and 31%  
21 of the population have completed higher education<sup>19</sup> (Brazilian national average is 11%).  
22  
23  
24  
25

### 26 27 **Corona São Caetano platform**

28  
29  
30 The objective of the platform was to offer clinical care for patients with flu syndrome and  
31 suspected COVID-19. Through the multimedia platform, patients could be triaged and guided  
32 in relation to their clinical needs and tested, without having to leave their homes or go to  
33 health facilities, unless seriously ill. This strategy aimed at reducing the workload in health  
34 units and the risk of SARS-CoV-2 transmission in the population served by these health  
35 units. Patients' GPs were informed of lab results and had access to clinical data stored in the  
36 platform. GPs were expected to call patients being assisted by the platform and provide  
37 medical assistance through home visits or at the primary care clinic if needed. In general, the  
38 drugs prescribed through the platform were restricted to analgesics and antipyretics. The  
39 platform was designed so that clinical information was collected in a standardized way for  
40 research purposes.  
41  
42  
43  
44  
45  
46  
47  
48  
49  
50

51 Residents of the municipality aged 12 years and older with suspected COVID-19 symptoms  
52 were encouraged, through local media reports, to contact the dedicated Corona São Caetano  
53 platform via the website (access at <https://coronasaocaetano.org/>) or by phone. They were  
54 invited to complete an initial screening questionnaire that included socio-demographic data;  
55 information on symptoms type, onset and duration; and recent contacts.  
56  
57  
58  
59  
60

1  
2  
3 Patients meeting the suspected COVID-19 case definition (i.e., having at least two of the  
4 following symptoms: fever, cough, sore throat, coryza, or change in/loss of smell (anosmia);  
5 or one of these symptoms plus at least two other symptoms consistent with COVID-19) were  
6 further evaluated, whilst people not meeting these criteria were reassured, advised to stay at  
7 home and contact the service again if they were to develop new symptoms or worsening of  
8 current ones. The case definition was developed in consultation with infectious disease and  
9 primary care specialists to encompass the known symptoms of COVID-19 and is similar to  
10 the Brazilian national case definition<sup>20</sup>. Patients were then called by a medical student to  
11 complete a risk assessment. All pregnant women, and patients meeting pre-defined triage  
12 criteria for severe disease (see Supplemental Material), were advised to attend a hospital  
13 service - either an emergency department or outpatient service, depending on availability.  
14 All other patients were offered a home visit for self-collection of a nasopharyngeal swab.

### 25 26 **Sample collection**

27  
28  
29 Patients self-collected nasopharyngeal swabs (NPS – both nostrils and throat) at their own  
30 homes under the supervision of trained healthcare personnel. We sent a link to an  
31 instructional video (<https://youtu.be/rWZzV2ZP7KY>) before the home visit to provide  
32 guidance on self-collection procedures. Nasopharyngeal swabs for the molecular detection of  
33 SARS-CoV-2 has been recommended as an alternative method of collection for samples from  
34 patients with suspected COVID-19<sup>21</sup>, as well as other respiratory diseases, and has the  
35 advantage of reducing the chance of aerosol transmission to healthcare professionals.  
36 Healthcare personnel were instructed to maintain a distance of six feet from the patient and to  
37 wear personal protective equipment at all times. Samples were immediately put on a cool box  
38 between 2-8°C and stored at 4°C in a fridge until shipment to the lab within 24 hours.

### 41 42 43 **Follow-up procedures**

44  
45  
46  
47  
48 Patients testing SARS-CoV-2 RT-PCR positive were followed up to 14 days<sup>22</sup> (a maximum  
49 of 7 phone calls) from completion of their initial questionnaire. They were contacted every 48  
50 hours by a medical student who completed another risk assessment and recorded any ongoing  
51 or new symptoms. The purpose of the follow-up was to assess clinical evolution. Where  
52 patients were judged to be deteriorating or developing severe disease they were signposted to  
53 secondary care services. Patients testing RT-PCR negative were followed up by the primary  
54  
55  
56  
57  
58  
59  
60

1  
2  
3 health care program for their residential area. They were advised to contact the platform for a  
4 new consultation if they developed new symptoms. Starting on May 19<sup>th</sup>, when serological  
5 testing became available, RT-PCR-negative patients were re-contacted to offer antibody  
6 (IgG/IgM combined) testing 14 days after their initial registration as long as they had become  
7 asymptomatic.  
8  
9  
10  
11  
12

### 13 **Study dates**

14  
15  
16  
17 The Corona São Caetano programme was launched on 6th April 2020, with a one week pilot  
18 phase designed to test instruments before roll-out. For this analysis, we included all patients  
19 making their first contact with the programme in its first month, ie between 13th April and  
20 13th May 2020. The period of follow-up (last date of data extraction) was 4th June 2020, to  
21 account for the accrual period (three weeks) of possible hospitalizations in the last included  
22 patients.  
23  
24  
25  
26  
27  
28

### 29 **Laboratory methods**

30  
31  
32 Due to shortages of some reagents, we used two RT-PCR platforms at different times during  
33 the study: ALTONA RealStar® SARS-CoV-2 RT-PCR Kit 1.0 (Hamburg, Germany) and the  
34 Mico BioMed RT-qPCR kit (Seongnam, South Korea). For serology we tested 10µL of  
35 serum or plasma (equivalent in performance) using a qualitative rapid chromatographic  
36 immunoassay (Wondfo Biotech Co., Guangzhou, China), that jointly detects anti-SARS-  
37 CoV-2 IgG/IgM. The assay has been found to have a sensitivity of 81.5% and specificity of  
38 99.1% in a US study<sup>23</sup>. In our local validation, after two weeks of symptoms, the sensitivity  
39 in 59 RT-PCR confirmed cases was 94.9%, and specificity in 106 biobank samples from  
40 2019 was 100%.  
41  
42  
43  
44  
45  
46  
47  
48  
49

### 50 **Statistical methods**

51  
52  
53 We estimated the contribution of our platform to total number of COVID-19 cases diagnosed  
54 in São Caetano do Sul. To do this, we compared the number of cases diagnosed in our  
55 programme with official data released by the Municipal Department of Health in its daily  
56 bulletins (accessed here <https://coronavirus.saocaetanodosul.sp.gov.br>).  
57  
58  
59  
60

1  
2  
3 Clinical and demographic data were extracted directly from the Corona São Caetano  
4 information system. To analyse clinical presentation, we first calculated the proportion and  
5 exact binomial 95% confidence intervals (CI) of cases reporting each symptom in the three  
6 testing groups: SARS-CoV-2 RT-PCR positive; RT-PCR negative / seropositive; and RT-  
7 PCR negative / seronegative. We next combined RT-PCR and serology positive cases to  
8 make a confirmed COVID-19 group, and those negative on both tests to make a SARS-CoV-  
9 2 negative control group. We express the association between each symptom and a positive  
10 COVID-19 diagnosis as odds ratios (OR) and 95% CIs.  
11  
12  
13  
14  
15  
16  
17  
18

19 Next, we assessed associations between RT-PCR cycle thresholds (Cts) and other clinical  
20 features. ALTONA and MiCo BioMed RT-PCR kits each separately amplify two different  
21 SARS-CoV-2 viral genes, as such each patient had two Ct values. There was a high  
22 concordance between Cts for the two genes within each kit (Figure S1), and we opted therefore  
23 to use the mean of the two Ct values for each patient in all analyses. We calculated univariable  
24 associations between Cts and age, sex, delay from symptom onset to NPS collection, and  
25 presenting symptoms using simple linear regression. We then built a multivariable linear  
26 regression model to assess independent associations between presenting symptoms and RT-  
27 PCR Cts. As age, sex, and time of swab collection may confound this relationship we included  
28 these variables, as well as the RT-PCR platform (ALTONA vs MiCo BioMed), as covariates  
29 in the model.  
30  
31  
32  
33  
34  
35  
36  
37  
38

39 For RT-PCR positive patients, hospitalizations and deaths were extracted from the study  
40 platform. To extend the follow-up period and to capture RT-PCR negative patients and those  
41 initially triaged to hospital (no study follow-up), hospitalization and vital status was  
42 confirmed by linkage with two administrative databases: the municipal epidemiological  
43 surveillance dataset, as well as the state-wide influenza-like illness notification system  
44 (SIVEP-Gripe). Linkage was last performed on 5<sup>th</sup> June 2020, 23 days after the last patient  
45 was enrolled, by the author SRPS who did not have access to the full analytic dataset. This  
46 author searched the SIVEP-Gripe system and the municipal epidemiological surveillance  
47 dataset using full name and date of birth. Categorical patient characteristics were compared  
48 between patients requiring and those not requiring hospitalization using a Chi-squared or  
49 Fisher exact test. Continuous variables were compared using the Wilcoxon rank sum test. A  
50 multivariate analysis was not conducted due to the small number of individuals experiencing  
51 this outcome.  
52  
53  
54  
55  
56  
57  
58  
59  
60

1  
2  
3  
4  
5 The cohort sample included consecutive cases presenting to the Corona São Caetano program  
6 and a formal sample size calculation was not performed. Missing data were excluded. All  
7 analyses were conducted in R Software for Statistical Computing, version 3.6.3.<sup>24</sup>  
8  
9

## 10 11 12 **Ethics**

13  
14  
15 The study was approved by the local ethics committee (Comissão de Ética para Análise de  
16 Projeto de Pesquisa - CAPPesq, protocol No. 13915, dated June 03, 2020). The committee  
17 waived the need for informed consent and allowed the development of an analytical dataset  
18 with no personal identification for the current analysis.  
19  
20  
21  
22

## 23 24 **Patient and public involvement**

25  
26  
27 Patients were not involved in the planning of this research.  
28  
29

## 30 31 **RESULTS**

### 32 33 34 **Epidemiological and programmatic indicators**

35  
36  
37 Over the study period, there were 2,073 presentations, from 2,011 individual patients, that  
38 met the criteria for a suspected COVID-19 case (See Figure 1 for study flow). At initial  
39 phone interview, 132 (6%) potential cases were advised to go directly to a health service  
40 based on the triage questions, and 12 (0.6%) because of pregnancy. Only four (3%) of  
41 referred patients were admitted to hospital and none died.  
42  
43  
44  
45  
46  
47

48 In total 1,583 individual patients were tested with RT-PCR for SARS-CoV-2; 444 (28.0%,  
49 95%CI: 25.9-30.3) were positive. The proportion of positive results was stable over the study  
50 (Figure S2). Among the RT-PCR negative group, 604 (53% of 1,136) underwent serology  
51 testing, of whom 52 (8.6%, 95%CI: 6.6-11.1) were seropositive. The median [IQR] time from  
52 symptom onset to serology collection was 31 [26–37] days. The age-sex structure of patients  
53 being tested differed from the underlying population of São Caetano do Sul (Figure S3) with  
54 an overrepresentation of working-age adults and women. At the beginning of programme role  
55 out, 25% of notified COVID-19 cases in São Caetano do Sul were diagnosed in our  
56  
57  
58  
59  
60

1  
2  
3 programme. Over the study period, adherence to the programme increased, and by May 13<sup>th</sup>,  
4  
5 2020, this figure had risen to 78%.  
6  
7

8 Of 444 RT-PCR positive patients eligible for longitudinal follow-up, 326 (73%) had their  
9 final follow-up visit at least 14 days after their initial presentation. Of the seven possible  
10 follow-up questionnaires, 384 (86%) COVID-19 patients completed three or more, and 162  
11 (36%) completed all seven.  
12  
13  
14

### 15 16 17 **Participant characteristics**

18  
19 Patient characteristics are shown in Table 1. Although women were overrepresented in the  
20 cohort, there were proportionally more males in the RT-PCR positive and seropositive groups  
21 compared to the seronegative group. Of note, 55% of RT-PCR negative/seronegative patients  
22 had completed higher education compared to 35% RT-PCR-positive patients ( $p < 0.001$ , Chi-  
23 squared test). The median number of days from symptom onset to swab collection was 5.0  
24 (IQR, 4.0-7.0) among RT-PCR positive patients and 6.0 (IQR, 4.0-8.3) among RT-PCR  
25 negative/seropositive patients ( $p = 0.06$ , Wilcoxon rank sum) (Figure S4). Chronic  
26 respiratory disease was less frequent in RT-PCR positive than dual-negative patients.  
27  
28  
29  
30  
31  
32  
33  
34  
35

### 36 **Symptoms of COVID-19**

37  
38 The prevalence of individual symptoms at presentation is shown in Figure 2A stratified by  
39 final diagnostic category. The most frequent symptoms among RT-PCR and seropositive  
40 patients were headache (82% and 75%), myalgia (80% and 80%), cough (77% and 63%), and  
41 fatigue (77% and 79%). Anosmia was present in 56% and 63% of RT-PCR positive and  
42 seropositive patients, respectively, compared to 30% in those testing doubly negative. A  
43 similar pattern was observed for ageusia (53% and 53% versus 30%). Upper respiratory tract  
44 symptoms - including coryza, blocked nose, ageusia, and anosmia - were more frequent in  
45 younger people (Figure 2B). The evolution of symptoms over time among RT-PCR positive  
46 patients is shown in Figure S5.  
47  
48  
49  
50  
51  
52  
53  
54  
55

56 The odds ratios for testing positive for SARS-CoV-2 (RT-PCR or serology) associated with  
57 each presenting symptom are shown in Figure 3. The symptoms with strongest associations  
58 were anosmia (OR 3.3, 95%CI: 2.6-4.4), fever (3.0, 95%CI: 2.4-3.9) and ageusia (2.9,  
59  
60

95%CI: 2.3-3.8). The presence of sore throat (0.53, 95%CI: 0.41-0.68) and diarrhoea (0.72, 95%CI: 0.55-0.96) were associated with a negative SARS-CoV-2 test.

### **Associations between SARS-CoV-2 RT-PCR Cycle threshold (Ct) values, and demographic and clinical features**

Figure 4 shows the associations between mean RT-PCR cycle threshold and demographic features and symptoms at presentation (the median [IQR] time from presentation to swab was 1 [1-2] day). Older age was associated with lower cycle thresholds, with a change in mean Ct of -0.05 (95%CI -0.09 to -0.01) for each additional year of age. The mean difference in Ct value was -1.36 (95% CI -2.49 to -0.23) in men compared to women. For each doubling in the number of days from symptom onset to swab collection the mean Ct value increased by 3.28 (95%CI 2.33 to 4.03). Presenting symptoms of fever and arthralgia were associated with lower Cts, whereas anosmia, ageusia, vomiting, diarrhoea, and nausea were associated with higher Cts (Figure 4 and Table S1). After adjustment for age, sex, delay from symptom onset, and RT-PCR platform used, fever (-0.06, 95%CI: -2.11 to -0.001) and arthralgia (-1.24, 95%CI: -2.18 to -0.10) remained associated with lower Cts, and anosmia (2.21, 95%CI: 1.0-3.29), ageusia (1.96, 95%CI: 0.88-3.0), and diarrhoea (1.36, 95%CI: 0.12-2.61) with higher Cts (Table S1).

### **Hospitalizations and deaths**

Of the 444 RT-PCR positive patients, 30 (6.8%) had been hospitalized by 5<sup>th</sup> June 2020, when the database linkage was last updated, and three (0.7%) had died; in-hospital mortality was therefore 10% (3/30). In 28 cases the date of admission was available. The median time from symptom onset to hospital admission was 7 (range 2 to 14) days. Among 1,136 RT-PCR-negative patients, six (0.5%) had been admitted to hospital. One (<0.01% of 1,136) of these six patients died. None of the 604 RT-PCR negative patients that underwent serology were admitted to hospital or died. Table 2 compares patient characteristics by hospitalization status. Notably, hospitalized patients were older, had more cardiovascular comorbidities and were more frequently obese.

## **DISCUSSION**



1  
2  
3  
4  
5 We present a community-based cohort of suspected COVID-19 cases recruited through a  
6 primary care initiative in the Brazilian municipality of São Caetano do Sul. Offering RT-PCR  
7 testing to all patients presenting with symptoms compatible with COVID-19, the positivity  
8 rate was 28%, with 8.6% of those testing negative subsequently found to be seropositive - i.e.  
9 > 35% of the cohort had a diagnosis of COVID-19. Anosmia, ageusia, and self-reported fever  
10 provided the greatest diagnostic value in identifying COVID-19. The rate of hospitalization  
11 and deaths among RT-PCR positive patients was low, at 6.8% and 0.7%, respectively. Our  
12 results provide important information on the clinical presentation, diagnostic testing and  
13 natural history of COVID-19 identified in the community.  
14  
15  
16  
17  
18  
19  
20  
21

22 The profile of suspected cases that tested positive for COVID-19 differed in some important  
23 respects from those testing negative. The lower educational level among positive cases  
24 suggests that, in São Caetano do Sul, the risk of exposure to COVID-19 follows a  
25 socioeconomic gradient, consistent with other findings from Brazil<sup>25,26</sup>. Although more  
26 women presented to the platform, proportionally more men tested positive, consistent with  
27 data from São Paulo showing a higher seroprevalence in men than women<sup>27</sup>, but also  
28 potentially reflecting different health seeking behaviours. Comorbidities were mostly similar,  
29 although chronic respiratory disease was less frequent in those testing RT-PCR positive. This  
30 may be due to a proportion of presentations in those with chronic respiratory disease being  
31 explained by exacerbations of their underlying pathology from aetiologies other than SARS-  
32 CoV-2, as well as higher anxiety about COVID-19 in those with pre-existing respiratory  
33 disease.  
34  
35  
36  
37  
38  
39  
40  
41  
42  
43  
44

45 Extrapolating the seropositivity rate among RT-PCR negative patients to the 532 who were  
46 not tested with serology, we estimate that an additional 46 seropositive cases would have  
47 been identified. As such, 18% (98/542) of COVID-19 cases were missed by RT-PCR in the  
48 setting of symptomatic presentations to primary care. This is similar to a pooled analysis  
49 showing a false-negative rate for RT-PCR of 20% at three days post-symptom onset.<sup>28</sup> Viral  
50 load peaks around the time of symptom onset and remains high over the first symptomatic  
51 week (also see Figure 4A).<sup>29,30</sup> Consistent with this, we found a slightly longer delay to swab  
52 collection (due to delay in presentation to the platform) in RT-PCR false-negative patients  
53 than RT-PCR positive patients (Figure S4).  
54  
55  
56  
57  
58  
59  
60



1  
2  
3 COVID-19 presents in a similar way to other respiratory viral illnesses. Indeed, in our cohort  
4 the most common symptoms of COVID-19 - such as cough, fatigue, headache, etc. - were  
5 reported with a similar frequency among patients testing negative. It is therefore important to  
6 have identified anosmia, ageusia, self-reported fever, myalgia, and anorexia as the symptoms  
7 with greatest value in the differential diagnosis of COVID-19 in primary care. This is  
8 consistent with systematic review evidence highlighting anosmia and ageusia as key  
9 diagnostic features of COVID-19<sup>31</sup>. It is of note that 30% of jointly RT-PCR and serology  
10 negative patients reported these symptoms, indicating that although indicative of COVID-19,  
11 the specificity of these symptoms is not high enough to rule in the diagnosis alone. Sore  
12 throat and diarrhoea - both considered symptoms of COVID-19 in other settings –<sup>32</sup> were  
13 more frequently due to other possible aetiologies in this primary care context.

14  
15  
16  
17  
18  
19  
20  
21  
22  
23  
24 These results are robust for a number of reasons. Firstly, our sample is representative of the  
25 population of interest - i.e. consecutive patients with suspected COVID-19 in the community  
26 - instead of extrapolating from hospital cases. Symptom data were collected prospectively,  
27 eliminating recall or interviewer bias. Finally, we have a control group of patients who were  
28 negative for both RT-PCR and serology, minimizing misclassification due to false negative  
29 RT-PCR.

30  
31  
32  
33  
34  
35  
36 In our study, the proportion of patients with a positive SARS-CoV-2 RT-PCR requiring  
37 hospitalization was low (7%). Early reports from China were of 13.8% of cases being  
38 severe<sup>33</sup>, but this value was lower when under ascertainment of cases was accounted for.<sup>34,35</sup>  
39 This is because our cohort reflects mild to moderate cases, as severely ill patients are likely to  
40 have attended hospital directly. As such, only 3% of patients we triaged to attend health  
41 services were ultimately hospitalized, possibly due to self-selection of patients presenting to  
42 our service. Supporting this, our overall case fatality ratio among RT-PCR positive patients  
43 was 0.7%. The rate of hospitalization was lower (0.5%) in those testing PCR-negative. These  
44 patients were admitted with a severe acute respiratory syndrome of an aetiology other than  
45 SARS-CoV-2. The 14-fold higher admission rate among PCR-positive cases highlights the  
46 importance of molecular testing for SARS-CoV-2 in patients presenting with features of  
47 respiratory viral illness to primary care.

48  
49  
50  
51  
52  
53  
54  
55  
56  
57  
58 As expected, the main determinant of Ct was the delay between symptom onset and swab  
59 collection, mostly due to the delay in reporting to the platform. After adjusting for this, as  
60

1  
2  
3 well as age and sex, we found that a self-reported fever and arthralgia were associated with  
4 lower Cts. The presence of these symptoms may identify patients with a higher viral load in  
5 the community. However, these results should be seen as purely exploratory, and the wide  
6 spread of Ct values around the regression line precludes a direct clinical application at  
7 present.  
8  
9  
10  
11  
12

13 Our study has some limitations. Firstly, serology was not performed on all RT-PCR negative  
14 patients due to on-going symptoms, loss to follow-up, or patient refusal. Of note, none of the  
15 RT-PCR-negative patients that were admitted to hospital underwent serology testing. This  
16 suggests that patients who were not tested with serology may have had a higher prevalence of  
17 COVID-19 than those that were tested. In addition, imperfect serology test performance  
18 (81% sensitivity)<sup>23</sup> will introduced false-negative results. Taken together, these biases may  
19 have underestimated the true seroprevalence among RT-PCR-negative cases, as well as the  
20 false-negative rate of RT-PCR. The latter calculation may also have been influenced by the  
21 inclusion of RT-PCR positive patients in the denominator, introducing an incorporation bias.<sup>36</sup>  
22 Furthermore, the association between symptoms and COVID-19 diagnosis was based on the  
23 comparison with doubly PCR and serology negative individuals. It is not clear how the  
24 exclusion of individuals that did not undergo serology testing would have influenced these  
25 associations. Finally, patients were not involved in the planning of the Corona platform or the  
26 research proposal.  
27  
28  
29  
30  
31  
32  
33  
34  
35  
36  
37  
38

39 A key strength to our study relates to the provision of primary healthcare in Brazil and its  
40 symbiosis with medical training nationwide. Primary health care - within the family health  
41 strategy (*Estratégia Saúde da Família*) - is centered around a healthcare unit with a multi-  
42 professional team that is responsible for all residents in the immediate catchment area <sup>8</sup>. São  
43 Caetano do Sul has enough GP units within the family health strategy that all residents have  
44 access to primary care. Medical students from the municipal university (USCS) are integrated  
45 into the primary healthcare teams and progressively trained from the first year of medical  
46 school. Our initiative took advantage of this existing system, with the addition of an online  
47 platform allowing remote clinical assessment and follow-up. The suspension of normal  
48 clinical training at the medical school provided the workforce. The partnership with the  
49 University of São Paulo, which provided the laboratory diagnostics, created the unique  
50 opportunity to establish our prospective community cohort of suspected and confirmed  
51 COVID-19 cases. But we believe that this infrastructure could be implemented in other  
52  
53  
54  
55  
56  
57  
58  
59  
60

1  
2  
3 regions with less resources. Other respiratory disease such as influenza, measles, or  
4 tuberculosis may benefit from similar approach. However, further evaluation of the impact of  
5 the Corona Platform are required.  
6  
7  
8  
9

## 10 **CONCLUSION**

11  
12  
13 Systematic testing of all suspected COVID-19 cases was feasible within primary care  
14 services in a Brazilian municipality. Anosmia, ageusia, and fever provide the greatest  
15 diagnostic discrimination from other similar primary care presentations. Home-care is a valid  
16 approach for most for most of these patients with a low rate of hospitalization and death.  
17 Our programme model – integrating multimedia technology, telehealth with universal access  
18 to primary care – may be successful in other contexts.  
19  
20  
21  
22  
23  
24

## 25 **CONTRIBUTION STATEMENT**

26  
27  
28  
29 FEL, MCMC, SFC, MC, RB, and ECS conceived and designed the study. FEL, RMZG, and  
30 JCSB provided clinical oversight and supervision of medical students. FEL, MCMC, LFB,  
31 HD, OT, LC, and SRPS collected and curated the data. MCMC, TRTM, LSVB, and LCOS  
32 performed the laboratory analysis. LFB performed the formal statistical analysis with  
33 assistance from FEL, SRPS, NDEA, PM, ECS and OT. LFB, FEL, PM and ECS wrote the  
34 first draft, and all authors reviewed, contributed to and approved the final version.  
35  
36  
37  
38  
39  
40

## 41 **CONFLICTS OF INTEREST STATEMENT**

42  
43  
44 The authors have no conflicts of interests. FL, RG, and JB were involved in providing  
45 clinical care within the Corona São Caetano Platform.  
46  
47  
48  
49

## 50 **FUNDING STATEMENT**

51  
52  
53 The municipal health department of São Caetano do Sul (Secretaria Municipal de Saúde da  
54 Prefeitura de São Caetano do Sul) funded the establishment and implementation of the  
55 platform. We also acknowledge an award from FAPESP (2018/14389-0) and the UK Medical  
56 Research Council (MR/S0195/1) to the Brazil-UK Centre for Arbovirus Discovery,  
57 Diagnosis, Genomics and Epidemiology (CADDE).  
58  
59  
60

## DATA SHARING STATEMENT

Data will be made available via the linked Figshare repository (URL) upon acceptance of the manuscript.

## REFERENCES

1. World Health Organization. (2020). Pneumonia of unknown cause – China. (<https://www.who.int/csr/don/05-january-2020-pneumonia-of-unkown-cause-china/en/>, accessed 2020-06-18).
2. World Health Organization. Critical preparedness, readiness and response actions for COVID-19 (Interim Guidance) (<https://www.who.int/publications-detail/critical-preparedness-readiness-and-response-actions-for-covid-19>, accessed 15 June 2020).
3. Bedford, J. et al. COVID-19: towards controlling of a pandemic. *The Lancet* **395**, 1015–1018 (2020).
4. Hellewell, J. et al. Feasibility of controlling COVID-19 outbreaks by isolation of cases and contacts. *Lancet Glob Health* **8**, e488–e496 (2020).
5. Dunlop, C., Howe, A., Li, D. & Allen, L. N. The coronavirus outbreak: the central role of primary care in emergency preparedness and response. *BJGP Open* **4**, bjgpopen20X101041 (2020).
6. World Health Organization. Regional Office for the Western Pacific. (2020). Role of primary care in the COVID-19 response. (<https://apps.who.int/iris/handle/10665/331921>, accessed 15 June, 2020).

- 1  
2  
3  
4 7. Redwood-Campbell, L. & Abrahams, J. Primary Health care and Disasters—The  
5  
6  
7 Current State of the Literature: What We Know, Gaps and Next Steps. *Prehosp.*  
8  
9  
10 *Disaster med.* **26**, 184–191 (2011).  
11
- 12  
13 8. Macinko, J. & Harris, M. J. Brazil’s Family Health Strategy — Delivering  
14  
15  
16 Community-Based Primary Care in a Universal Health System. *NEJM* **372**,  
17  
18  
19 2177–2181 (2015).  
20
- 21  
22 9. World Health Organization. Situation report 27 (2020).  
23  
24 ([https://www.who.int/emergencies/diseases/novel-coronavirus-2019/situation-](https://www.who.int/emergencies/diseases/novel-coronavirus-2019/situation-reports)  
25  
26 [reports](https://www.who.int/emergencies/diseases/novel-coronavirus-2019/situation-reports), accessed 15 June 2020).  
27
- 28  
29 10. Brazilian Ministry of Health. (<https://covid.saude.gov.br/>).  
30
- 31  
32 11. Docherty, A. B. et al. Features of 20 133 UK patients in hospital with covid-19  
33  
34 using the ISARIC WHO Clinical Characterisation Protocol: prospective  
35  
36 observational cohort study. *BMJ* m1985 (2020) doi:10.1136/bmj.m1985.  
37
- 38  
39 12. Richardson, S. et al. Presenting Characteristics, Comorbidities, and Outcomes  
40  
41 Among 5700 Patients Hospitalized With COVID-19 in the New York City Area.  
42  
43 *JAMA* **323**, 2052 (2020).  
44
- 45  
46 13. Zhou, F. et al. Clinical course and risk factors for mortality of adult inpatients with  
47  
48 COVID-19 in Wuhan, China: a retrospective cohort study. *The Lancet* **395**, 1054–  
49  
50  
51 1062 (2020).  
52
- 53  
54 14. Rauh, A. L. & Linder, J. A. Covid-19 care before, during, and beyond the hospital.  
55  
56  
57 *BMJ* m2035 (2020) doi:10.1136/bmj.m2035.  
58  
59  
60

- 1  
2  
3 15. Lapostolle, F. et al. Clinical features of 1487 COVID-19 patients with outpatient  
4 management in the Greater Paris: the COVID-call study. *Intern Emerg Med* **15**,  
5 813–817 (2020).  
6  
7  
8  
9
- 10  
11 16. Mizrahi, B. et al. Longitudinal symptom dynamics of COVID-19 infection in  
12 primary care. <http://medrxiv.org/lookup/doi/10.1101/2020.07.13.20151795> (2020)  
13  
14  
15  
16  
17 doi:10.1101/2020.07.13.20151795.
- 18 17. Williamson, E. J. et al. Factors associated with COVID-19-related death using  
19  
20  
21  
22  
23  
24  
25  
26  
27  
28  
29  
30  
31  
32  
33  
34  
35  
36  
37  
38  
39  
40  
41  
42  
43  
44  
45  
46  
47  
48  
49  
50  
51  
52  
53  
54  
55  
56  
57  
58  
59  
60  
20  
21  
22  
23  
24  
25  
26  
27  
28  
29  
30  
31  
32  
33  
34  
35  
36  
37  
38  
39  
40  
41  
42  
43  
44  
45  
46  
47  
48  
49  
50  
51  
52  
53  
54  
55  
56  
57  
58  
59  
60  
OpenSAFELY. *Nature* **584**, 430–436 (2020).
18. Instituto Brasileiro de Geografia e Estatística (IBGE). (2020). São Caetano do  
Sul / Panorama. ([https://cidades.ibge.gov.br/brasil/sp/sao-caetano-do-](https://cidades.ibge.gov.br/brasil/sp/sao-caetano-do-sul/panorama)  
sul/panorama).
19. Human Development Atlas Brazil. (2020). São Caetano do Sul  
([http://atlasbrasil.org.br/2013/pt/perfil\\_m/sao-caetano-do-sul\\_sp](http://atlasbrasil.org.br/2013/pt/perfil_m/sao-caetano-do-sul_sp)).
20. Brazilian COVID-19 case definition and notification criteria. Brazilian Ministry of  
Health (<https://coronavirus.saude.gov.br/definicao-de-caso-e-notificacao>).
21. Akmatov, M. K., Gatzemeier, A., Schughart, K. & Pessler, F. Equivalence of Self-  
and Staff-Collected Nasal Swabs for the Detection of Viral Respiratory  
Pathogens. *PLoS ONE* **7**, e48508 (2012).
22. Walsh, K. A. et al. SARS-CoV-2 detection, viral load and infectivity over the  
course of an infection. *Journal of Infection* **81**, 357–371 (2020).
23. Whitman, J. D. et al. Test performance evaluation of SARS-CoV-2 serological  
assays. *medRxiv* 2020.04.25.20074856 (2020)  
doi:10.1101/2020.04.25.20074856.

- 1  
2  
3 24. R Core Team. R: A language and environment for statistical computing. R  
4 Foundation for Statistical Computing, Vienna, Austria. URL [https://www.R-](https://www.R-project.org/)  
5 [project.org/](https://www.R-project.org/). (2019).  
6  
7  
8  
9
- 10 25. Baqui, P., Bica, I., Marra, V., Ercole, A. & van der Schaar, M. Ethnic and regional  
11 variations in hospital mortality from COVID-19 in Brazil: a cross-sectional  
12 observational study. *The Lancet Global Health* **8**, e1018–e1026 (2020).  
13  
14  
15  
16  
17
- 18 26. Hallal, P. C. et al. SARS-CoV-2 antibody prevalence in Brazil: results from two  
19 successive nationwide serological household surveys. *The Lancet Global Health*  
20 S2214109X20303879 (2020) doi:10.1016/S2214-109X(20)30387-9.  
21  
22  
23  
24
- 25 27. Buss, L. F. et al. COVID-19 herd immunity in the Brazilian Amazon.  
26 <http://medrxiv.org/lookup/doi/10.1101/2020.09.16.20194787> (2020)  
27  
28  
29  
30  
31  
32
- 33 28. Kucirka, L. M., Lauer, S. A., Laeyendecker, O., Boon, D. & Lessler, J. Variation in  
34 False-Negative Rate of Reverse Transcriptase Polymerase Chain Reaction–  
35 Based SARS-CoV-2 Tests by Time Since Exposure. *Ann Int Med* M20-1495  
36  
37  
38  
39  
40  
41  
42
- 43 29. To, K. K.-W. et al. Temporal profiles of viral load in posterior oropharyngeal  
44 saliva samples and serum antibody responses during infection by SARS-CoV-2:  
45 an observational cohort study. *Lancet Inf Dis* **20**, 565–574 (2020).  
46  
47  
48  
49
- 50 30. He, X. et al. Temporal dynamics in viral shedding and transmissibility of COVID-  
51 19. *Nat Med* **26**, 672–675 (2020).  
52  
53  
54  
55
- 56 31. Carpenter, C. R., Mudd, P. A., West, C. P., Wilber, E. & Wilber, S. T. Diagnosing  
57 COVID-19 in the Emergency Department: A Scoping Review of Clinical  
58  
59  
60

- 1  
2  
3 Examinations, Laboratory Tests, Imaging Accuracy, and Biases. *Acad Emerg*  
4  
5  
6 *Med* **27**, 653–670 (2020).  
7  
8  
9 32. Vetter, P. et al. Clinical features of covid-19. *BMJ* m1470 (2020)  
10  
11 doi:10.1136/bmj.m1470.  
12  
13 33. T. Team, Vital Surveillances: The Epidemiological Characteristics of an Outbreak  
14  
15 of 2019 Novel Coronavirus Diseases (COVID-19)-China. *China CDC Weekly* **2**,  
16  
17 113–122 (2020).  
18  
19  
20  
21 34. Salje, H. et al. Estimating the burden of SARS-CoV-2 in France. *Science*  
22  
23 eabc3517 (2020) doi:10.1126/science.abc3517.  
24  
25  
26 35. Verity, R. et al. Estimates of the severity of coronavirus disease 2019: a model-  
27  
28 based analysis. *Lancet Infect Dis* **20**, 669–677 (2020).  
29  
30  
31  
32 36. Worster, A. & Carpenter, C. Incorporation bias in studies of diagnostic tests: how  
33  
34 to avoid being biased about bias. *CJEM* **10**, 174–175 (2008).  
35  
36  
37  
38  
39  
40  
41  
42  
43  
44  
45  
46  
47  
48  
49  
50  
51  
52  
53  
54  
55  
56  
57  
58  
59  
60



## TABLE LEGENDS

**Table 1 Demographic and clinical characteristics of 1,048 suspected COVID-19 cases undergoing diagnostic testing in the Corona São Caetano program.** \* Security, emergency services, supermarket, public transport, and pharmacy workers. IQR: interquartile range; HCW: health care workers, COPD: chronic obstructive pulmonary disease. Missing data – educational level 2; essential occupation 2; body mass index 4; cardiovascular disease 28; diabetes 31 mellitus; chronic resp. disease 65; chronic kidney disease 27; COPD 28. P-values calculated by Chi-squared, Fisher exact, or Wilcoxon rank sum.

**Table 2 Characteristics of RT-PCR positive patients stratified by hospitalization status.** Missing data – body mass index 2; cardiovascular disease 12; diabetes mellitus 12; chronic respiratory disease 29; COPD 11; chronic kidney disease 12; COPD - chronic obstructive pulmonary disease; IQR - interquartile range.

## FIGURE LEGENDS

**Figure 1** Patient flowchart for the Corona São Caetano platform between 13<sup>th</sup> April and 13<sup>th</sup> May 2020. In the upper section (white background) the numbers correspond to individual presentations to the system; among suspected cases 2,073 suspected cases, 60 had two presentations and one had three. In the lower section (grey background) numbers correspond to individual patients making up the final analytic groups.

**Figure 2** Panel A presents prevalence (point) and exact binomial 95% confidence intervals (vertical lines) of symptoms at presentation among patients with suspected COVID-19 according to RT-PCR result and serostatus (A). Panels B and C present the prevalence of presenting symptoms among patients with COVID-19 (RT-PCR and serology positive) stratified by age (B) and sex (C).

**Figure 3** Odds ratios (black dot) and 95% confidence intervals (lines) for testing positive for COVID-19 (RT-PCR positive or serology positive) associated with the presence of each presenting symptom. Horizontal axis is on log scale. Point estimates of odds ratios are shown inline with their corresponding symptom.

1  
2  
3 **Figure 4** Relationship between mean RT-PCR cycle threshold (Ct) and day of illness course  
4 when the nasopharyngeal swab was collected (A), patient age (B), patient sex (C), and  
5 different symptoms at presentation. Panels A and B show the best fit linear regression lines,  
6  
7 panels C and D are violin plots (rotated kernel density plots showing the full distribution of  
8 data) of the Ct values with median (black dot) and interquartile range (black line).  
9  
10  
11  
12  
13  
14  
15  
16  
17  
18  
19  
20  
21  
22  
23  
24  
25  
26  
27  
28  
29  
30  
31  
32  
33  
34  
35  
36  
37  
38  
39  
40  
41  
42  
43  
44  
45  
46  
47  
48  
49  
50  
51  
52  
53  
54  
55  
56  
57  
58  
59  
60

**Table 1**

|                                                                                | <b>RT-PCR +ve<br/>(G1)</b><br>N = 444<br>n (%) or median (IQR) | <b>RT-PCR -ve<br/>Sero +ve (G2)</b><br>N=52<br>n (%) or median (IQR) | <b>RT-PCR -ve<br/>Sero -ve (G3)</b><br>N = 552<br>n (%) or median (IQR) | <b>p-value</b><br>G1 versus G2 | <b>p-value</b><br>G1 versus G3 |
|--------------------------------------------------------------------------------|----------------------------------------------------------------|----------------------------------------------------------------------|-------------------------------------------------------------------------|--------------------------------|--------------------------------|
| <b>Sex</b>                                                                     |                                                                |                                                                      |                                                                         |                                |                                |
| Male                                                                           | 200 (45.0)                                                     | 23 (44.2)                                                            | 185 (33.5)                                                              | 1.0                            | <0.001                         |
| Female                                                                         | 244 (55.0)                                                     | 29 (55.8)                                                            | 367 (66.5)                                                              |                                |                                |
| <b>Age groups (years)</b>                                                      |                                                                |                                                                      |                                                                         |                                |                                |
| 10 to 19                                                                       | 29 (6.5)                                                       | 1 (1.9)                                                              | 25 (4.5)                                                                | 0.07                           | 0.40                           |
| 20 to 39                                                                       | 197 (44.4)                                                     | 17 (32.7)                                                            | 236 (42.8)                                                              |                                |                                |
| 40 to 59                                                                       | 158 (35.6)                                                     | 28 (53.8)                                                            | 218 (39.5)                                                              |                                |                                |
| 60+                                                                            | 60 (13.5)                                                      | 6 (11.5)                                                             | 73 (13.2)                                                               |                                |                                |
| <b>Educational level</b>                                                       |                                                                |                                                                      |                                                                         |                                |                                |
| Up to primary education                                                        | 75 (16.9)                                                      | 7 (13.5)                                                             | 56 (10.2)                                                               | 0.10                           | <0.001                         |
| High school                                                                    | 214 (48.3)                                                     | 19 (36.5)                                                            | 194 (35.2)                                                              |                                |                                |
| University                                                                     | 154 (34.8)                                                     | 26 (50.0)                                                            | 301 (54.6)                                                              |                                |                                |
| <b>Essential Occupation</b>                                                    |                                                                |                                                                      |                                                                         |                                |                                |
| Non-HCW essential job *                                                        | 137 (30.9)                                                     | 12 (23.1)                                                            | 148 (26.9)                                                              | 0.45                           | 0.01                           |
| Carers                                                                         | 10 (2.3)                                                       | 0 (0.0)                                                              | 8 (1.5)                                                                 |                                |                                |
| HCW                                                                            | 32 (7.2)                                                       | 5 (9.6)                                                              | 73 (13.2)                                                               |                                |                                |
| No                                                                             | 264 (59.6)                                                     | 35 (67.3)                                                            | 322 (58.4)                                                              |                                |                                |
| <b>Body mass index (kg/m<sup>2</sup>)</b>                                      |                                                                |                                                                      |                                                                         |                                |                                |
| <25                                                                            | 151 (34.2)                                                     | 22 (42.3)                                                            | 211 (38.4)                                                              | 0.62                           | 0.14                           |
| 25-29                                                                          | 182 (41.2)                                                     | 17 (32.7)                                                            | 187 (34.0)                                                              |                                |                                |
| 30-35                                                                          | 79 (17.9)                                                      | 9 (17.3)                                                             | 112 (20.4)                                                              |                                |                                |
| 35+                                                                            | 30 (6.8)                                                       | 4 (7.7)                                                              | 40 (7.3)                                                                |                                |                                |
| <b>Comorbidities</b>                                                           |                                                                |                                                                      |                                                                         |                                |                                |
| Cardiovascular disease                                                         | 88 (20.4)                                                      | 9 (17.6)                                                             | 129 (24.0)                                                              | 0.89                           | 0.40                           |
| Diabetes mellitus                                                              | 48 (11.1)                                                      | 4 (7.8)                                                              | 39 (7.3)                                                                | 0.86                           | 0.12                           |
| Any chronic resp. disease                                                      | 37 (8.9)                                                       | 9 (18.0)                                                             | 79 (15.3)                                                               | 0.13                           | 0.01                           |
| COPD                                                                           | 24 (5.5)                                                       | 5 (9.8)                                                              | 54 (10.1)                                                               | 0.47                           | 0.03                           |
| Chronic kidney disease                                                         | 1 (<1)                                                         | 0 (0.0)                                                              | 3 (1.0)                                                                 | 1.0                            | 0.83                           |
| <b>Time from symptom<br/>onset to swab collection<br/>(days), median (IQR)</b> | 5.0 (4.0-7.0)                                                  | 6.0 (4.0-8.3)                                                        | 6.0 (4.0-9.0)                                                           | 0.06                           | <0.001                         |

**Table 2**

|                                           | <b>Hospitalized</b><br>n=30<br>n (%) or median (IQR) | <b>Not hospitalized</b><br>n=414<br>n (%) or median (IQR) | <b>p-value</b> |
|-------------------------------------------|------------------------------------------------------|-----------------------------------------------------------|----------------|
| <b>Age (years)</b>                        |                                                      |                                                           |                |
| 10 to 19                                  | 1 (3)                                                | 28 (97)                                                   |                |
| 20 to 39                                  | 6 (3)                                                | 191 (97)                                                  |                |
| 40 to 59                                  | 14 (9)                                               | 144 (91)                                                  |                |
| 60+                                       | 9 (15)                                               | 51 (85)                                                   | 0.006          |
| <b>Sex</b>                                |                                                      |                                                           |                |
| Female                                    | 16 (7)                                               | 228 (93)                                                  |                |
| Male                                      | 14 (7)                                               | 186 (93)                                                  | 0.852          |
| <b>Comorbidities</b>                      |                                                      |                                                           |                |
| Cardiovascular disease                    | 11 (13)                                              | 77 (87)                                                   | 0.001          |
| Diabetes mellitus                         | 8 (17)                                               | 40 (83)                                                   | 0.007          |
| Any chronic resp. disease                 | 2 (5)                                                | 35 (95)                                                   | 1.0            |
| COPD                                      | 1 (5)                                                | 23 (95)                                                   | 1.0            |
| Chronic kidney disease                    | 1 (100)                                              | 0 (0)                                                     | 0.06           |
| <b>Body mass index (Kg/m<sup>2</sup>)</b> |                                                      |                                                           |                |
| <25                                       | 4 (3)                                                | 147 (97)                                                  |                |
| 25-29                                     | 8 (4)                                                | 174 (96)                                                  |                |
| 30-35                                     | 12 (15)                                              | 67 (85)                                                   |                |
| 35+                                       | 6 (20)                                               | 24 (80)                                                   | <0.001         |
| <b>Time to presentation (days)</b>        | 3 (3 to 4)                                           | 4 (3 to 5)                                                | 0.072          |

1  
2  
3  
4  
5  
6  
7  
8  
9  
10  
11  
12  
13  
14  
15  
16  
17  
18  
19  
20  
21  
22  
23  
24  
25  
26  
27  
28  
29  
30  
31  
32  
33  
34  
35  
36  
37  
38  
39  
40  
41  
42  
43  
44  
45  
46  
47  
48  
49  
50  
51  
52  
53  
54  
55  
56  
57  
58  
59  
60

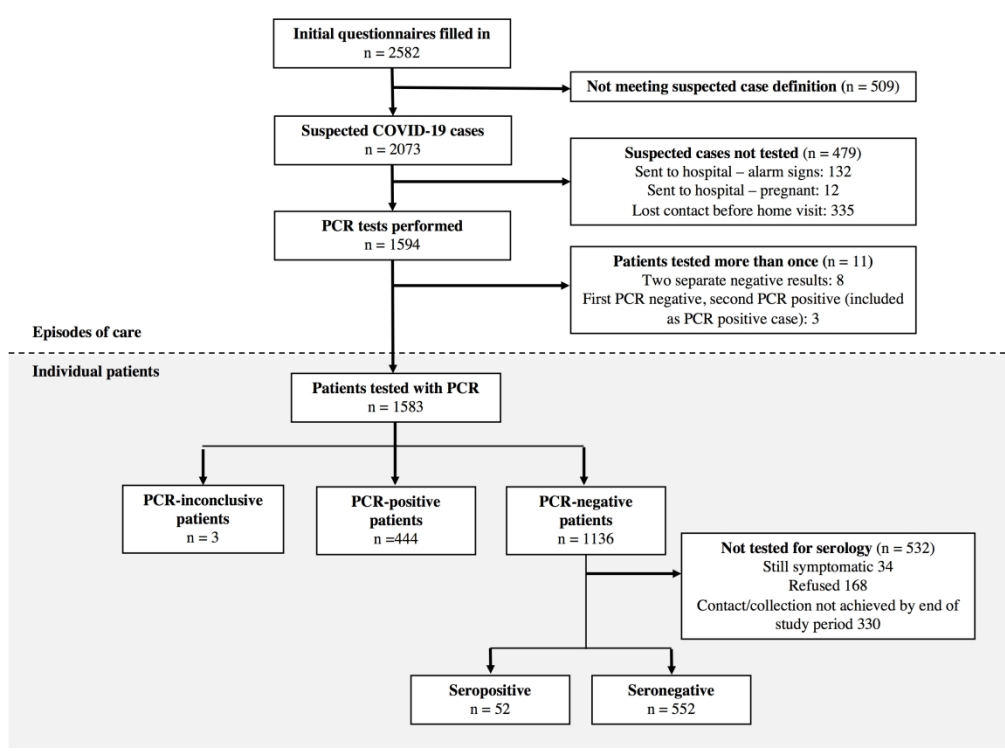

Figure 1

246x181mm (300 x 300 DPI)

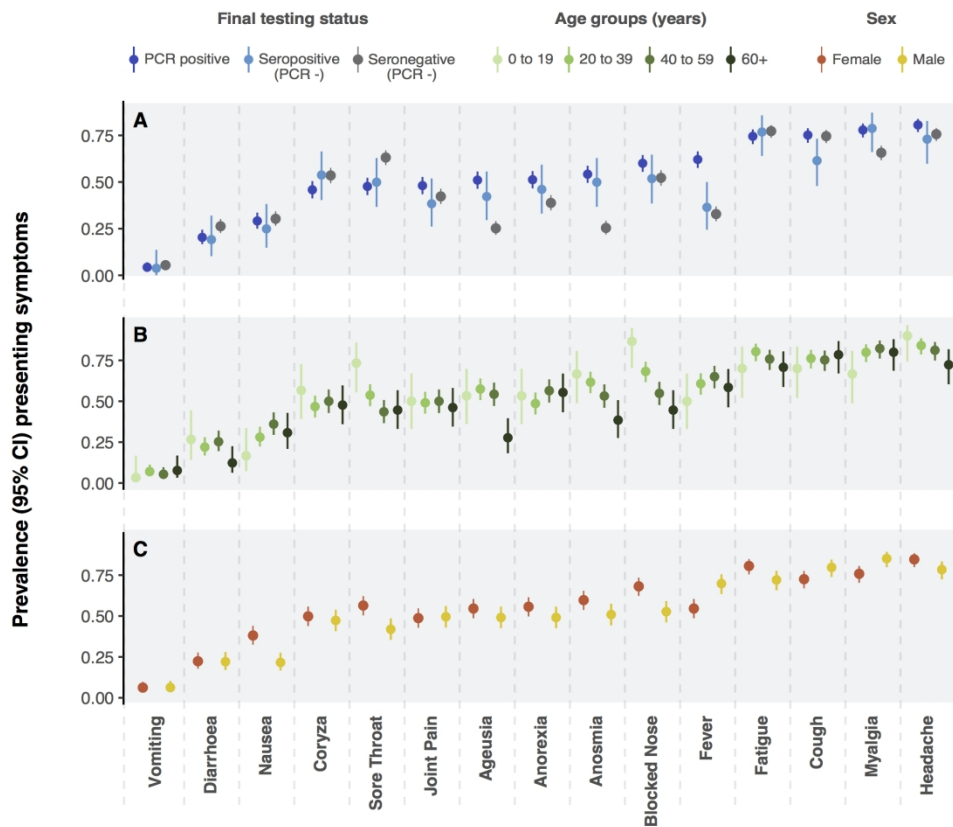

Figure 2

187x158mm (300 x 300 DPI)

1  
2  
3  
4  
5  
6  
7  
8  
9  
10  
11  
12  
13  
14  
15  
16  
17  
18  
19  
20  
21  
22  
23  
24  
25  
26  
27  
28  
29  
30  
31  
32  
33  
34  
35  
36  
37  
38  
39  
40  
41  
42  
43  
44  
45  
46  
47  
48  
49  
50  
51  
52  
53  
54  
55  
56  
57  
58  
59  
60

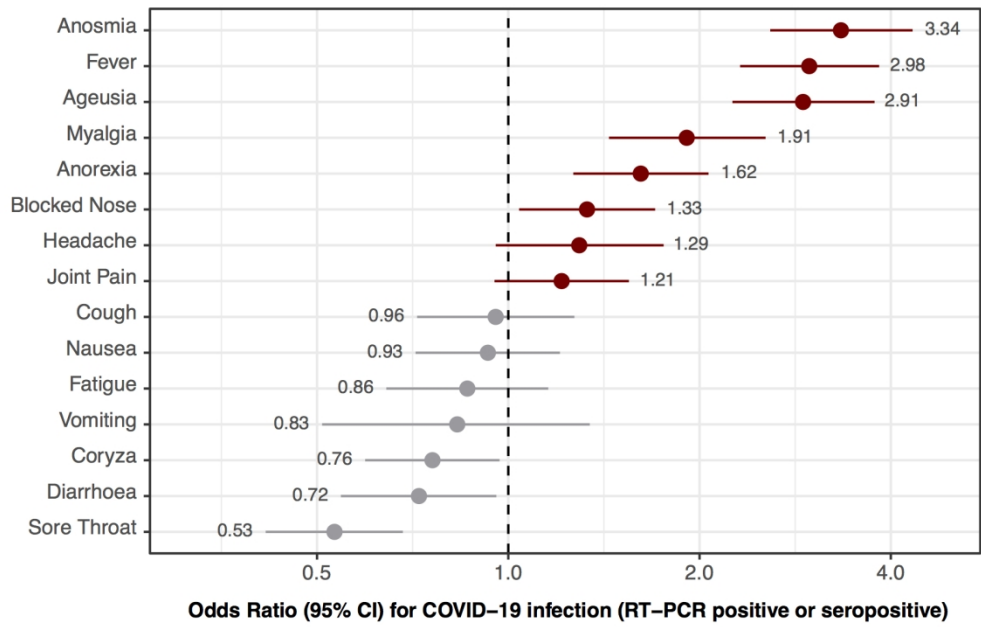

Figure 3

154x100mm (300 x 300 DPI)

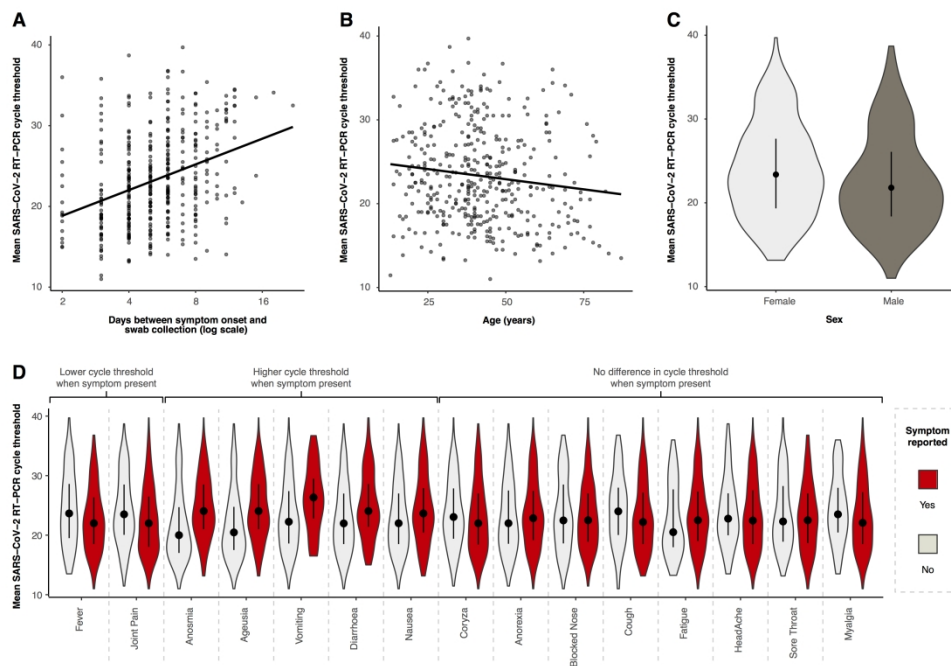

Figure 4

327x222mm (300 x 300 DPI)



## Supplemental material

### Initial risk assessment

Patients meeting the definition of a suspected case were called by a medical student (under supervision) to complete a risk assessment. All patients were asked a set of standardized questions:

- Do you feel short of breath?
- Are you breathing quickly or finding it difficult to breath?
- If yes, can you count your respiratory rate over one minute? (respiratory rate >20 breaths/minute was considered tachypnoea)
- Has your fever worsened over the last 3 days or have you had a new fever after 2 days being fever-free?
- Have you felt confused or lethargic?

If the patient answered “yes” to any of these questions they were advised to attend a specialist health service. Among the 132 patients that were triaged to hospital, 76 (58% of 132) had shortness of breath, 76 (58% of 132) reported rapid breathing, 33 (25% of 132) persistent fever and 22 (17% of 132) altered mental status.

**Table S1 Univariable and adjusted associations between RT-PCR cycle thresholds and patient characteristics**

|                                                                      | Unadjusted analysis        |                         | Adjusted analysis *        |                         |
|----------------------------------------------------------------------|----------------------------|-------------------------|----------------------------|-------------------------|
|                                                                      | Beta (difference in means) | 95% Confidence interval | Beta (difference in means) | 95% Confidence interval |
| Age (years)                                                          | <b>-0.05</b>               | <b>-0.09 to -0.01</b>   | <b>-0.06</b>               | <b>-0.09 to -0.03</b>   |
| Male sex                                                             | <b>-1.36</b>               | <b>-2.49 to -0.23</b>   | -1.05                      | -2.09 to <0.001         |
| Days from symptom onset to swab collection (days, log <sub>2</sub> ) | <b>3.28</b>                | <b>2.33 to 4.03</b>     | <b>3.27</b>                | <b>0.42 to 7.70</b>     |
| PCR platform (ALTONA as reference)                                   | <b>-1.19</b>               | <b>-2.37 to -0.02</b>   | <b>-1.53</b>               | <b>-2.6 to -0.45</b>    |
| <b>Symptoms at presentation</b>                                      |                            |                         |                            |                         |
| Fever                                                                | <b>-1.78</b>               | <b>-2.96 to -0.59</b>   | <b>-1.11</b>               | <b>-2.11 to -0.001</b>  |
| Myalgia                                                              | -1.31                      | -2.75 to 0.12           | -0.78                      | -2.11 to 0.53           |
| Arthralgia                                                           | <b>-1.64</b>               | <b>-2.77 to -0.52</b>   | <b>-1.24</b>               | <b>-2.18 to -0.10</b>   |
| Anosmia                                                              | <b>3.15</b>                | <b>2.04 to 4.25</b>     | <b>2.21</b>                | <b>1.0 to 3.29</b>      |
| Agusia                                                               | <b>2.99</b>                | <b>1.89 to 4.09</b>     | <b>1.96</b>                | <b>0.88 to 3.0</b>      |
| Diarrhea                                                             | <b>2.19</b>                | <b>0.84 to 3.53</b>     | <b>1.36</b>                | <b>0.12 to 2.61</b>     |
| Nausea                                                               | <b>1.50</b>                | <b>0.28 to 2.72</b>     | 1.09                       | -0.04 to 2.24           |
| Vomiting                                                             | <b>2.99</b>                | <b>0.52 to 5.46</b>     | 2.02                       | -0.28 to 4.33           |
| Anorexia                                                             | 0.56                       | -0.57 to 1.70           | 0.47                       | -0.58 to 1.51           |
| Headache                                                             | -0.58                      | -2.12 to 0.97           | -0.81                      | -2.25 to 0.63           |
| Fatigue                                                              | 0.84                       | -0.50 to 2.18           | 0.34                       | -0.91 to 1.59           |
| Coryza                                                               | -0.78                      | -1.92 to 0.34           | -0.68                      | -1.72 to 0.34           |
| Blocked nose                                                         | -0.36                      | -1.53 to 0.81           | <b>-1.48</b>               | <b>-2.59 to -0.37</b>   |
| Cough                                                                | -1.33                      | -2.70 to 0.03           | <b>-1.60</b>               | <b>-2.86 to -0.33</b>   |
| Sore throat                                                          | -0.49                      | -1.62 to 0.64           | -0.45                      | -1.52 to 0.61           |

\* All variables adjusted for age (continuous in years), sex (female as reference group), PCR platform (ALTONA platform as the reference group) and time between symptom onset and swab collection (log base 2). Analysis was performed within a linear regression framework. Positive beta coefficients indicate higher cycle thresholds (lower viral load) associated with that variable, whereas negative beta coefficients indicate lower cycle thresholds when the variable is present. Results in bold reached statistical significance.

## Supplemental figures

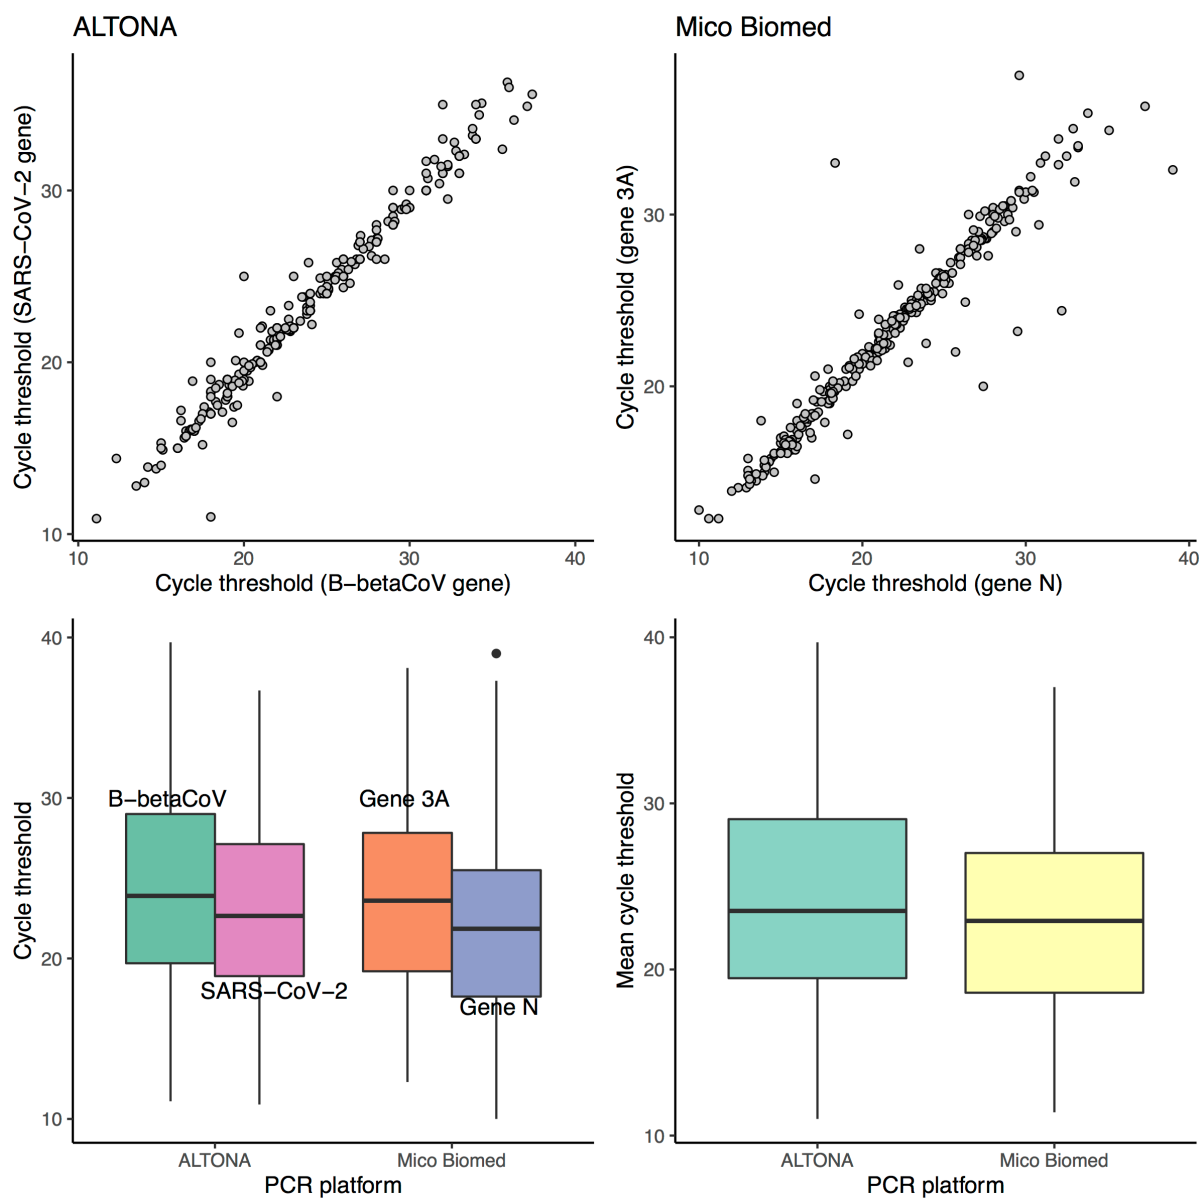

**Figure S1** Comparison of cycle thresholds across PCR platforms and genes amplified. Upper two panels show the concordance between cycle thresholds for the two separate genes amplified by the ALTONA (left) and Mico Biomed (right) kits. Lower left panel – distribution of cycle thresholds by gene amplified and RT-PCR platform used. Lower right-hand panel – distribution of the mean cycle threshold (mean of cycle thresholds for separate genes) between different RT-PCR platforms.

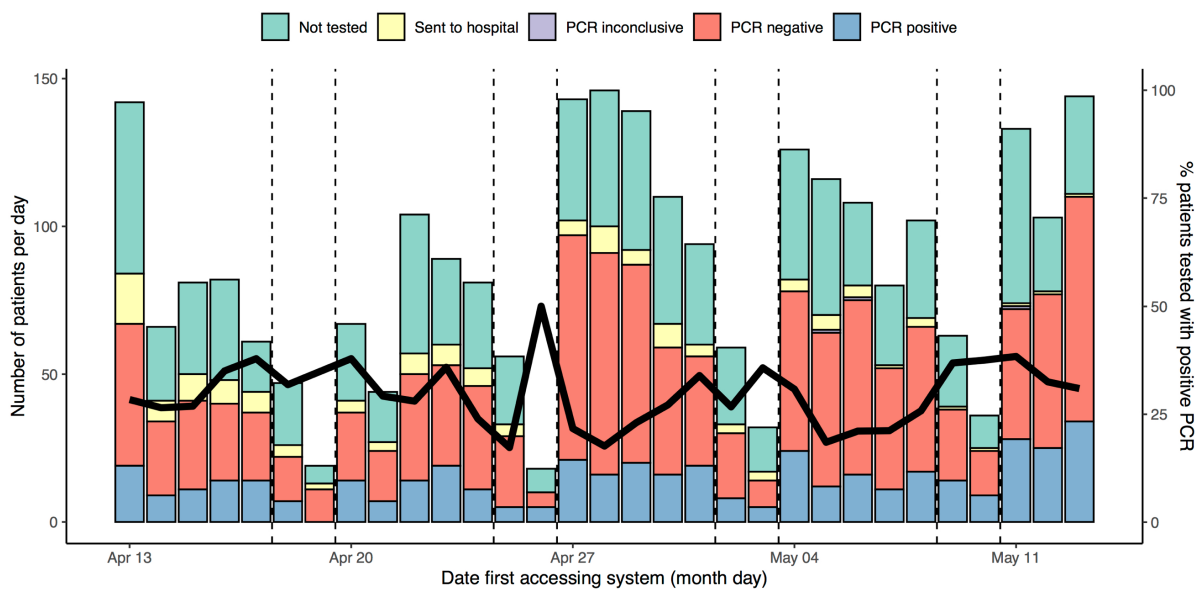

**Figure S2** Time series of presentations to the Corona São Caetano platform. Dashed vertical lines denote the weekends with a reduced number of presentations. Thick black line corresponds to the right-hand y-axis: proportion of RT-PCRs performed with positive result.

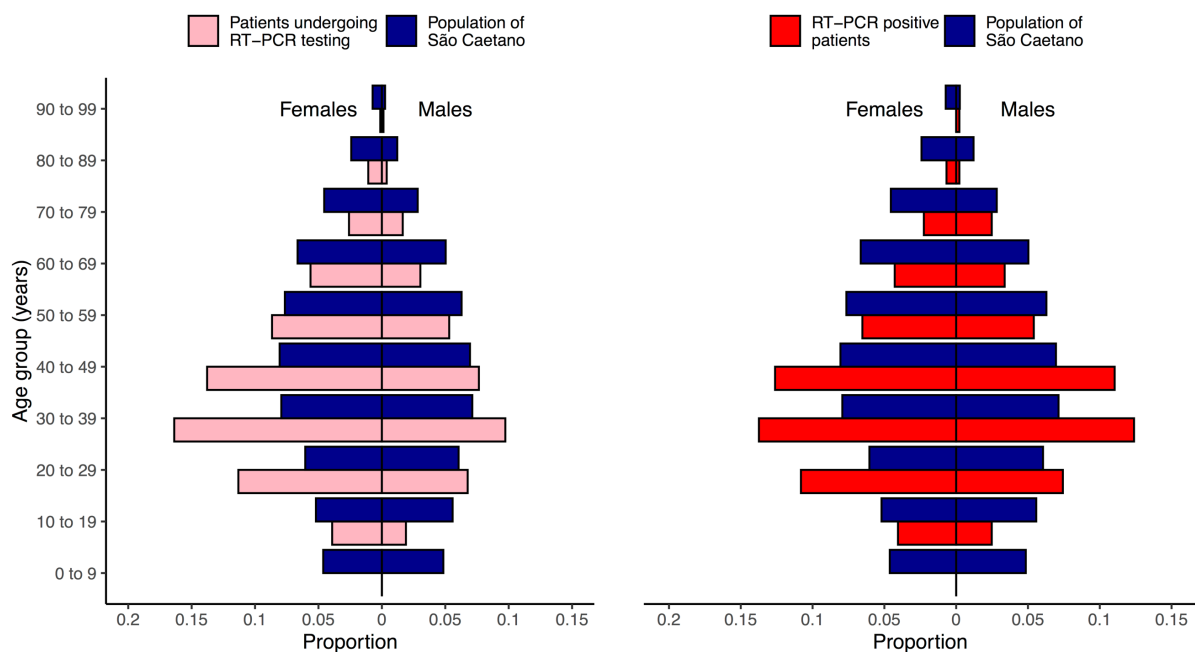

**Figure S3** Age-sex distribution the city of São Caetano do Sul compared with that of patients accessing the Corona São Caetano system and being tested with RT-PCR (left-hand panel) and those testing positive for SARS-CoV-2 (right-hand panel).

1  
2  
3  
4  
5  
6  
7  
8  
9  
10  
11  
12  
13  
14  
15  
16  
17  
18  
19  
20  
21  
22  
23  
24  
25  
26  
27  
28  
29  
30  
31  
32  
33  
34  
35  
36  
37  
38  
39  
40  
41  
42  
43  
44  
45  
46  
47  
48  
49  
50  
51  
52  
53  
54  
55  
56  
57  
58  
59  
60

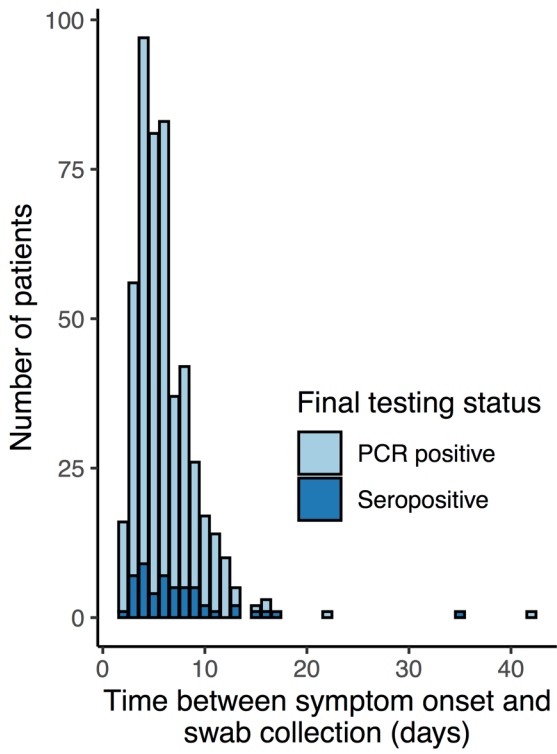

Figure S4 Histogram of delay between symptom onset and swab collection among patients with COVID-19.

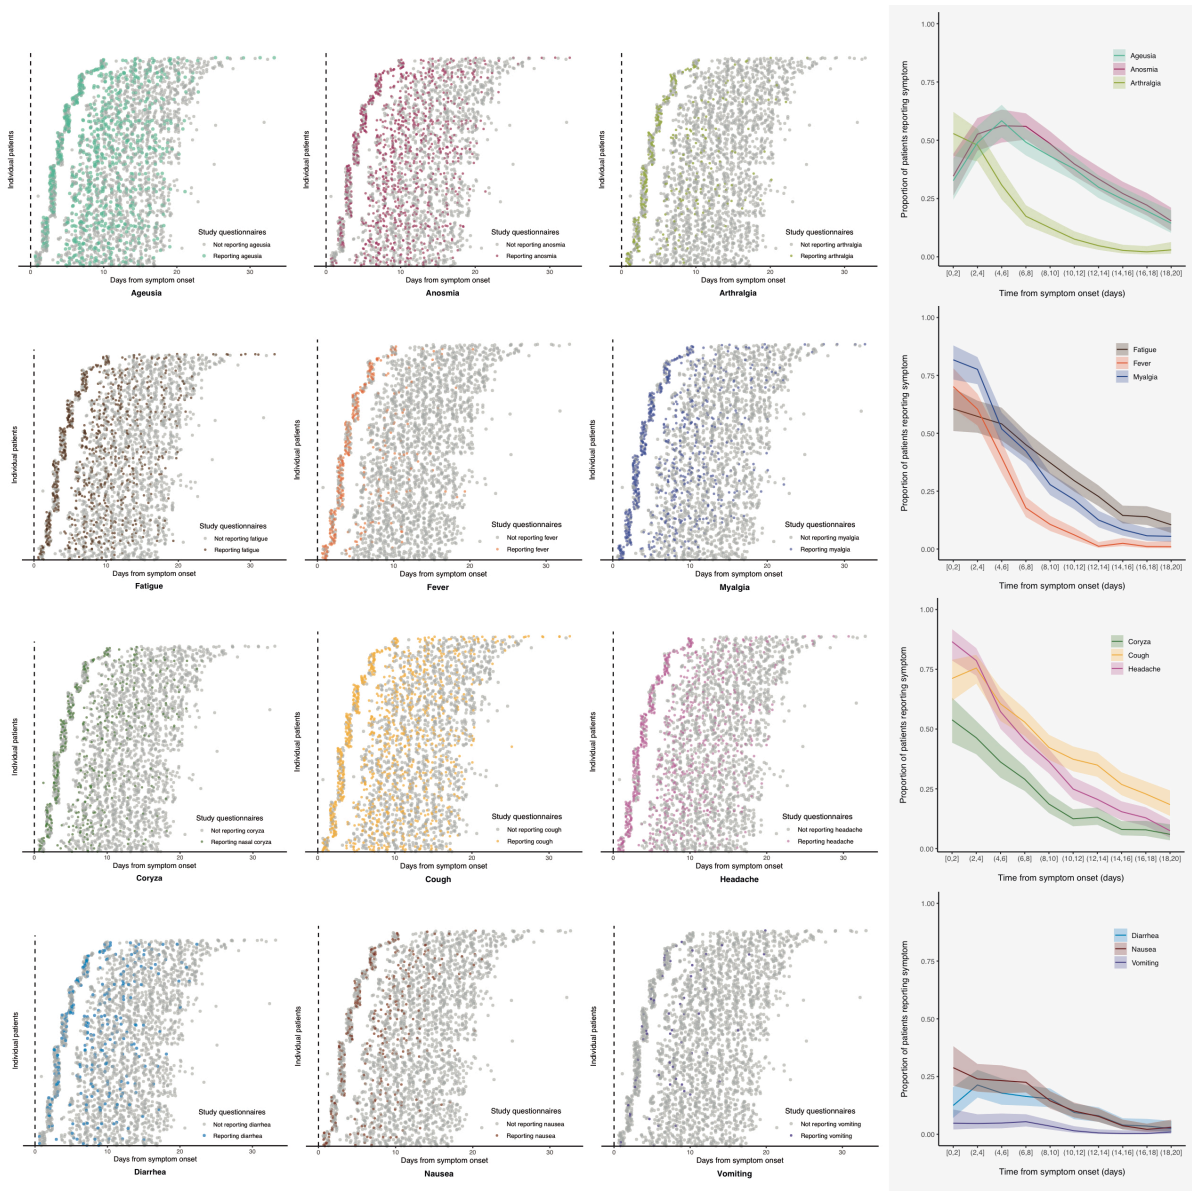

**Figure S5** Left hand figures show symptoms at each follow-up questionnaire among patients testing RT-PCR positive and undergoing follow-up. Individual patients are stacked on the y-axis ordered according to the delay from symptom onset to presentation. Each point represents the response to a questionnaire and its position on the horizontal axis the time after symptom onset that the questionnaire was filled in. Grey points are questionnaires where the patient denied the presence of a given symptom. The coloured points correspond to questionnaires in which the patient reported a given symptom. The right-hand figures results from grouping the horizontal axis time into two-day windows and calculating the proportion of completed questionnaires in which each symptom was reported. The denominators for the horizontal axis groups (number of questionnaires completed within a given time window from symptom onset) are 104 at [0-2] days, 192 at (2-4], 185 at (4-6], 293 at (6-8], 338 at (8-10], 329 at (10-12], 335 at (12-14], 324 at (14-16], 280 at (16-18] and 201 at (18-20].

STROBE Statement—Checklist of items that should be included in reports of *cohort studies*

|                              | Item No | Recommendation                                                                                                                                                                                                                                                                                                         | Page No                                                                     |
|------------------------------|---------|------------------------------------------------------------------------------------------------------------------------------------------------------------------------------------------------------------------------------------------------------------------------------------------------------------------------|-----------------------------------------------------------------------------|
| <b>Title and abstract</b>    | 1       | (a) Indicate the study's design with a commonly used term in the title or the abstract<br>(b) Provide in the abstract an informative and balanced summary of what was done and what was found                                                                                                                          | 1 and 2                                                                     |
| <b>Introduction</b>          |         |                                                                                                                                                                                                                                                                                                                        |                                                                             |
| Background/rationale         | 2       | Explain the scientific background and rationale for the investigation being reported                                                                                                                                                                                                                                   | 4                                                                           |
| Objectives                   | 3       | State specific objectives, including any prespecified hypotheses                                                                                                                                                                                                                                                       | 4                                                                           |
| <b>Methods</b>               |         |                                                                                                                                                                                                                                                                                                                        |                                                                             |
| Study design                 | 4       | Present key elements of study design early in the paper                                                                                                                                                                                                                                                                | 5 to 7                                                                      |
| Setting                      | 5       | Describe the setting, locations, and relevant dates, including periods of recruitment, exposure, follow-up, and data collection                                                                                                                                                                                        | 5 to 6                                                                      |
| Participants                 | 6       | (a) Give the eligibility criteria, and the sources and methods of selection of participants. Describe methods of follow-up<br>(b) For matched studies, give matching criteria and number of exposed and unexposed                                                                                                      | A – 5<br>B - NA                                                             |
| Variables                    | 7       | Clearly define all outcomes, exposures, predictors, potential confounders, and effect modifiers. Give diagnostic criteria, if applicable                                                                                                                                                                               | 7 to 8                                                                      |
| Data sources/<br>measurement | 8*      | For each variable of interest, give sources of data and details of methods of assessment (measurement). Describe comparability of assessment methods if there is more than one group                                                                                                                                   | 5 to 7                                                                      |
| Bias                         | 9       | Describe any efforts to address potential sources of bias                                                                                                                                                                                                                                                              | 7 to 8                                                                      |
| Study size                   | 10      | Explain how the study size was arrived at                                                                                                                                                                                                                                                                              | 8                                                                           |
| Quantitative variables       | 11      | Explain how quantitative variables were handled in the analyses. If applicable, describe which groupings were chosen and why                                                                                                                                                                                           |                                                                             |
| Statistical methods          | 12      | (a) Describe all statistical methods, including those used to control for confounding<br>(b) Describe any methods used to examine subgroups and interactions<br>(c) Explain how missing data were addressed<br>(d) If applicable, explain how loss to follow-up was addressed<br>(e) Describe any sensitivity analyses | A – 7 to 8<br>B – NA<br>C – 8<br>D – NA<br>E – NA                           |
| <b>Results</b>               |         |                                                                                                                                                                                                                                                                                                                        |                                                                             |
| Participants                 | 13*     | (a) Report numbers of individuals at each stage of study—eg numbers potentially eligible, examined for eligibility, confirmed eligible, included in the study, completing follow-up, and analysed<br>(b) Give reasons for non-participation at each stage<br>(c) Consider use of a flow diagram                        | Figure 1<br>and page<br>9                                                   |
| Descriptive data             | 14*     | (a) Give characteristics of study participants (eg demographic, clinical, social) and information on exposures and potential confounders<br>(b) Indicate number of participants with missing data for each variable of interest                                                                                        | A – table<br>1 and<br>pages<br>9to10<br><br>B - Table<br>1 and 2<br>legends |

|                          |     |                                                                                                                                                                                                                                                                                                                                                                                                               |                                     |
|--------------------------|-----|---------------------------------------------------------------------------------------------------------------------------------------------------------------------------------------------------------------------------------------------------------------------------------------------------------------------------------------------------------------------------------------------------------------|-------------------------------------|
|                          |     | (c) Summarise follow-up time (eg, average and total amount)                                                                                                                                                                                                                                                                                                                                                   | C – page<br>9                       |
| Outcome data             | 15* | Report numbers of outcome events or summary measures over time                                                                                                                                                                                                                                                                                                                                                | 11                                  |
| Main results             | 16  | (a) Give unadjusted estimates and, if applicable, confounder-adjusted estimates and their precision (eg, 95% confidence interval). Make clear which confounders were adjusted for and why they were included<br>(b) Report category boundaries when continuous variables were categorized<br>(c) If relevant, consider translating estimates of relative risk into absolute risk for a meaningful time period | Page 7<br>and<br>results<br>section |
| Other analyses           | 17  | Report other analyses done—eg analyses of subgroups and interactions, and sensitivity analyses                                                                                                                                                                                                                                                                                                                | NA                                  |
| <b>Discussion</b>        |     |                                                                                                                                                                                                                                                                                                                                                                                                               |                                     |
| Key results              | 18  | Summarise key results with reference to study objectives                                                                                                                                                                                                                                                                                                                                                      | 12                                  |
| Limitations              | 19  | Discuss limitations of the study, taking into account sources of potential bias or imprecision. Discuss both direction and magnitude of any potential bias                                                                                                                                                                                                                                                    | 13                                  |
| Interpretation           | 20  | Give a cautious overall interpretation of results considering objectives, limitations, multiplicity of analyses, results from similar studies, and other relevant evidence                                                                                                                                                                                                                                    | 13                                  |
| Generalisability         | 21  | Discuss the generalisability (external validity) of the study results                                                                                                                                                                                                                                                                                                                                         | 13                                  |
| <b>Other information</b> |     |                                                                                                                                                                                                                                                                                                                                                                                                               |                                     |
| Funding                  | 22  | Give the source of funding and the role of the funders for the present study and, if applicable, for the original study on which the present article is based                                                                                                                                                                                                                                                 | 14                                  |

\*Give information separately for exposed and unexposed groups.

**Note:** An Explanation and Elaboration article discusses each checklist item and gives methodological background and published examples of transparent reporting. The STROBE checklist is best used in conjunction with this article (freely available on the Web sites of PLoS Medicine at <http://www.plosmedicine.org/>, Annals of Internal Medicine at <http://www.annals.org/>, and Epidemiology at <http://www.epidem.com/>). Information on the STROBE Initiative is available at <http://www.strobe-statement.org>.



# BMJ Open

## Clinical features and natural history of the first 2,073 suspected COVID-19 cases in the Corona São Caetano primary care programme: a prospective cohort study

|                                 |                                                                                                                                                                                                                                                                                                                                                                                                                                                                                                                                                                                                                                                                                                                                                                                                                                                                                                                                                                                                                                                                                                                                                                                                                                                                                                                                                                                                                                                                                                                                                                                                                                                                                                                                                                                                                                                                                                                                                                                                   |
|---------------------------------|---------------------------------------------------------------------------------------------------------------------------------------------------------------------------------------------------------------------------------------------------------------------------------------------------------------------------------------------------------------------------------------------------------------------------------------------------------------------------------------------------------------------------------------------------------------------------------------------------------------------------------------------------------------------------------------------------------------------------------------------------------------------------------------------------------------------------------------------------------------------------------------------------------------------------------------------------------------------------------------------------------------------------------------------------------------------------------------------------------------------------------------------------------------------------------------------------------------------------------------------------------------------------------------------------------------------------------------------------------------------------------------------------------------------------------------------------------------------------------------------------------------------------------------------------------------------------------------------------------------------------------------------------------------------------------------------------------------------------------------------------------------------------------------------------------------------------------------------------------------------------------------------------------------------------------------------------------------------------------------------------|
| Journal:                        | <i>BMJ Open</i>                                                                                                                                                                                                                                                                                                                                                                                                                                                                                                                                                                                                                                                                                                                                                                                                                                                                                                                                                                                                                                                                                                                                                                                                                                                                                                                                                                                                                                                                                                                                                                                                                                                                                                                                                                                                                                                                                                                                                                                   |
| Manuscript ID                   | bmjopen-2020-042745.R2                                                                                                                                                                                                                                                                                                                                                                                                                                                                                                                                                                                                                                                                                                                                                                                                                                                                                                                                                                                                                                                                                                                                                                                                                                                                                                                                                                                                                                                                                                                                                                                                                                                                                                                                                                                                                                                                                                                                                                            |
| Article Type:                   | Original research                                                                                                                                                                                                                                                                                                                                                                                                                                                                                                                                                                                                                                                                                                                                                                                                                                                                                                                                                                                                                                                                                                                                                                                                                                                                                                                                                                                                                                                                                                                                                                                                                                                                                                                                                                                                                                                                                                                                                                                 |
| Date Submitted by the Author:   | 02-Dec-2020                                                                                                                                                                                                                                                                                                                                                                                                                                                                                                                                                                                                                                                                                                                                                                                                                                                                                                                                                                                                                                                                                                                                                                                                                                                                                                                                                                                                                                                                                                                                                                                                                                                                                                                                                                                                                                                                                                                                                                                       |
| Complete List of Authors:       | <p>Leal, Fabio ; Universidade Municipal de São Caetano do Sul; Instituto Nacional de Cancer</p> <p>Mendes-Correa, Maria; Universidade de São Paulo, Instituto de Medicina Tropical (LIM-52, LIM-46, LIM-49) and Departamento de Moléstias Infecciosas e Parasitárias</p> <p>Buss, Lewis; Universidade de São Paulo, Instituto de Medicina Tropical (LIM-52, LIM-46, LIM-49) and Departamento de Moléstias Infecciosas e Parasitárias</p> <p>Costa, Silvia; Universidade de São Paulo, Instituto de Medicina Tropical (LIM-52, LIM-46, LIM-49) and Departamento de Moléstias Infecciosas e Parasitárias</p> <p>Bizarro, Joao; Universidade Municipal de São Caetano do Sul</p> <p>de Souza, Sonia ; Universidade Municipal de São Caetano do Sul</p> <p>Thomaz, Osorio; Instituto de Pesquisas Tecnológicas</p> <p>Tozetto-Mendoza, Tania; Universidade de São Paulo, Instituto de Medicina Tropical (LIM-52, LIM-46, LIM-49) and Departamento de Moléstias Infecciosas e Parasitárias</p> <p>Villas-Boas, Lucy; Universidade de São Paulo, Instituto de Medicina Tropical (LIM-52, LIM-46, LIM-49) and Departamento de Moléstias Infecciosas e Parasitárias</p> <p>Oliveira, Lea; Universidade de São Paulo, Instituto de Medicina Tropical (LIM-52, LIM-46, LIM-49) and Departamento de Moléstias Infecciosas e Parasitárias</p> <p>Grespan, Regina; Universidade Municipal de São Caetano do Sul</p> <p>Capuani, Ligia; Modular Research System</p> <p>Buccheri, Renata; Universidade de São Paulo, Instituto de Medicina Tropical (LIM-52, LIM-46, LIM-49) and Departamento de Moléstias Infecciosas e Parasitárias</p> <p>Domingues, Helves; Modular Research System</p> <p>Alexander, Neal; London School of Hygiene &amp; Tropical Medicine</p> <p>Mayaud, Philippe; London School of Hygiene &amp; Tropical Medicine</p> <p>Sabino, Ester; Universidade de São Paulo, Instituto de Medicina Tropical (LIM-52, LIM-46, LIM-49) and Departamento de Moléstias Infecciosas e Parasitárias</p> |
| <b>Primary Subject Heading</b>: | Infectious diseases                                                                                                                                                                                                                                                                                                                                                                                                                                                                                                                                                                                                                                                                                                                                                                                                                                                                                                                                                                                                                                                                                                                                                                                                                                                                                                                                                                                                                                                                                                                                                                                                                                                                                                                                                                                                                                                                                                                                                                               |
| Secondary Subject Heading:      | Epidemiology, Public health, Global health                                                                                                                                                                                                                                                                                                                                                                                                                                                                                                                                                                                                                                                                                                                                                                                                                                                                                                                                                                                                                                                                                                                                                                                                                                                                                                                                                                                                                                                                                                                                                                                                                                                                                                                                                                                                                                                                                                                                                        |

1  
2  
3  
4  
5  
6  
7  
8  
9  
10  
11  
12  
13  
14  
15  
16  
17  
18  
19  
20  
21  
22  
23  
24  
25  
26  
27  
28  
29  
30  
31  
32  
33  
34  
35  
36  
37  
38  
39  
40  
41  
42  
43  
44  
45  
46  
47  
48  
49  
50  
51  
52  
53  
54  
55  
56  
57  
58  
59  
60

|           |                                                                                    |
|-----------|------------------------------------------------------------------------------------|
| Keywords: | PRIMARY CARE, Epidemiology < TROPICAL MEDICINE, INFECTIOUS DISEASES, PUBLIC HEALTH |
|           |                                                                                    |

SCHOLARONE™  
Manuscripts



I, the Submitting Author has the right to grant and does grant on behalf of all authors of the Work (as defined in the below author licence), an exclusive licence and/or a non-exclusive licence for contributions from authors who are: i) UK Crown employees; ii) where BMJ has agreed a CC-BY licence shall apply, and/or iii) in accordance with the terms applicable for US Federal Government officers or employees acting as part of their official duties; on a worldwide, perpetual, irrevocable, royalty-free basis to BMJ Publishing Group Ltd ("BMJ") its licensees and where the relevant Journal is co-owned by BMJ to the co-owners of the Journal, to publish the Work in this journal and any other BMJ products and to exploit all rights, as set out in our [licence](#).

The Submitting Author accepts and understands that any supply made under these terms is made by BMJ to the Submitting Author unless you are acting as an employee on behalf of your employer or a postgraduate student of an affiliated institution which is paying any applicable article publishing charge ("APC") for Open Access articles. Where the Submitting Author wishes to make the Work available on an Open Access basis (and intends to pay the relevant APC), the terms of reuse of such Open Access shall be governed by a Creative Commons licence – details of these licences and which [Creative Commons](#) licence will apply to this Work are set out in our licence referred to above.

Other than as permitted in any relevant BMJ Author's Self Archiving Policies, I confirm this Work has not been accepted for publication elsewhere, is not being considered for publication elsewhere and does not duplicate material already published. I confirm all authors consent to publication of this Work and authorise the granting of this licence.

1  
2  
3 **Clinical features and natural history of the first 2,073 suspected COVID-19 cases in the**  
4 **Corona São Caetano primary care programme: a prospective cohort study**  
5  
6  
7

8 Fabio E Leal<sup>1,2\*</sup> (PhD), Maria C Mendes-Correa<sup>3\*</sup> (PhD), Lewis F Buss<sup>3\*#</sup> (MBBS), Silvia  
9 F Costa<sup>3</sup> (PhD), Joao CS Bizario<sup>1</sup> (PhD), Sonia RP de Souza<sup>1</sup> (PhD), Osorio Thomaz<sup>4</sup> (PhD),  
10 Tania R Tozetto-Mendoza<sup>1</sup> (PhD), Lucy S Villas-Boas<sup>3</sup>, Lea CO Silva<sup>3</sup> (PhD), Regina MZ  
11 Grespan (MD)<sup>1</sup>, Ligia Capuani<sup>5</sup> (PhD), Renata Buccheri<sup>3</sup> (MD), Helves Domingues (PhD)<sup>5</sup>,  
12 Neal DE Alexander<sup>6</sup> (PhD), Philippe Mayaud<sup>6</sup> (MD), Ester C Sabino<sup>3</sup> (PhD)  
13  
14  
15  
16  
17

18 \* These authors contributed equally  
19  
20  
21

22 **Affiliations**  
23

- 24 1. Universidade Municipal de São Caetano do Sul (USCS), Rua Santo Antonio, São  
25 Caetano do Sul, Brazil
- 26 2. National Cancer Institute (INCA), Praça Cruz Vermelha, Rio de Janeiro, Brazil
- 27 3. Instituto de Medicina Tropical (LIM-52, LIM-46, LIM-49) and Departamento de  
28 Moléstias Infecciosas e Parasitarias da Faculdade de Medicina da Universidade de São  
29 Paulo Avenida Dr. Enéas Carvalho de Aguiar, São Paulo, Brazil
- 30 4. Instituto de Pesquisas Tecnológicas do Estado de São Paulo - IPT
- 31 5. Modular Research System, Avenida Paulista, São Paulo, Brazil
- 32 6. London School of Hygiene and Tropical Medicine (LSHTM), Keppel Street, London,  
33 United Kingdom  
34  
35  
36  
37  
38  
39  
40  
41  
42

43 **Corresponding author:**

44 # Dr Lewis F Buss

45 Instituto de Medicina Tropical da Faculdade de Medicina da Universidade de São Paulo

46 [lewisbuss@usp.br](mailto:lewisbuss@usp.br)  
47  
48  
49  
50  
51  
52

53 KEY WORDS: SARS-CoV-2, COVID-19, pandemic, community, primary care, Brazil  
54  
55  
56  
57  
58  
59  
60

## ABSTRACT

**Background:** Despite most cases not requiring hospital care, there are limited community-based clinical data on COVID-19.

**Methods:** The Corona São Caetano program is a primary care initiative providing care to all residents with COVID-19 in São Caetano do Sul, Brazil. It was designed to capture standardised clinical data on community COVID-19 cases. After triage of potentially severe cases, consecutive patients presenting to a multimedia screening platform between 13th April and 13th May 2020 were tested at home with SARS-CoV-2 reverse transcriptase (RT) PCR; positive patients were followed up for 14 days with phone calls every 2 days. RT-PCR-negative patients were offered additional SARS-CoV-2 serology testing to establish their infection status. We describe the clinical, virologic and natural history features of this prospective population-based cohort.

**Findings:** Of 2,073 suspected COVID-19 cases, 1,583 (76.4%) were tested by RT-PCR, of whom 444 (28.0%, 95%CI: 25.9-30.3) were positive; 604/1,136 (53%) RT-PCR-negative patients underwent serology, of whom 52 (8.6%) tested SARS-CoV-2 seropositive. The most common symptoms of confirmed COVID-19 were cough, fatigue, myalgia and headache; whereas self-reported fever (OR 3.0, 95%CI: 2.4-3.9), anosmia (OR 3.3, 95%CI: 2.6-4.4), and ageusia (2.9, 95%CI: 2.3-3.8) were most strongly associated with a positive COVID-19 diagnosis by RT-PCR or serology. RT-PCR cycle thresholds were lower in men, older patients, those with fever and arthralgia, and closer to symptom onset. The rates of hospitalization and death among 444 RT-PCR-positive cases were 6.7% and 0.7%, respectively, with older age and obesity more frequent in the hospitalized group.

**Conclusion:** COVID-19 presents in a similar way to other mild community-acquired respiratory diseases, but the presence of fever, anosmia, and ageusia can assist the specific diagnosis. Most patients recovered without requiring hospitalization with a low fatality rate compared to other hospital-based studies.

### Strengths and limitations of this study

1. The clinical features of COVID-19 have mostly been described in hospital-based studies which are biased towards severe disease
2. We report a prospective cohort of suspected and confirmed COVID-19 cases from a primary care initiative in the Brazilian municipality of São Caetano do Sul
3. By systematically testing consecutive suspected community cases with molecular and serological tests we were able to address the diagnostic value of clinical features of mild-moderate COVID-19 in primary care
4. Prospective follow-up of confirmed cases and linkage with hospital datasets allowed us to describe the natural history of a primary care COVID-19 population
5. A limitation of the work was that not all PCR-negative participants underwent serology testing due to loss to follow-up

## INTRODUCTION

A comprehensive public health response is vital but difficult to achieve during an epidemic. The COVID-19 pandemic, caused by the novel severe acute respiratory syndrome coronavirus 2 (SARS-CoV-2), started in China in late 2019.<sup>1</sup> According to the World Health Organization (WHO)<sup>2,3</sup> and others<sup>4,5</sup>, the ideal early response should have been multipronged, with identification, isolation, treatment and contact tracing of symptomatic cases, relying on a strong testing programme. Primary health care is well placed to implement such a response, by identifying cases early and managing them in a way that minimizes overcrowding of emergency rooms and intensive care units.<sup>6,7</sup> Real-time data analysis coming from these primary care response systems can inform policy decisions.

Primary health care (PHC) in Brazil is provided by the publicly funded Unified Health System (SUS – Portuguese acronym) within the family health strategy (*Estratégia Saúde da Família*). Provision of care is centred around a healthcare unit with a multi-professional team that is responsible for all residents in the immediate catchment area<sup>8</sup>. Nearly two-thirds of the Brazilian population is covered by the family health strategy<sup>8</sup>.

In Brazil, the first case of COVID-19 was identified in the city of São Paulo on 26<sup>th</sup> February 2020.<sup>9</sup> As of 1<sup>st</sup> Dec 2020 there were over 6 million confirmed cases nationally, with São Paulo contributing a fifth of these.<sup>10</sup> The reasons for the exceptionally large epidemic in Brazil have been discussed elsewhere<sup>11–13</sup>. In March 2020, the Municipal Health Department of the municipality of São Caetano do Sul – part of the Greater Metropolitan Region of São Paulo – began to develop a clinical and testing platform to organize its COVID-19 response. The aim was to provide universal detection and management of symptomatic cases and their contacts. The platform was developed in partnership with two local universities – the Municipal University of São Caetano do Sul (USCS) and the University of São Paulo (USP) – and called “Corona São Caetano”.

Large scale community-based observational cohorts are difficult to establish under epidemic circumstances, particularly if the risk of exposure for research personnel is high. Hence, most COVID-19 epidemiological and clinical studies have been hospital-based,<sup>14–16</sup> and therefore tend to include more severe cases whose findings may not be generalizable to the general

1  
2  
3  
4 population<sup>17</sup>, although some limited descriptions from ambulatory settings are available<sup>18–20</sup>.

5  
6 The objectives of this study were to describe the epidemiological indicators of the early phase  
7 of the programme rollout; and to describe the clinical, virological and natural history features  
8 (including hospitalization and deaths) of SARS-CoV-2 infection among patients identified in  
9 primary care.  
10  
11  
12

## 13 14 **METHODS**

### 15 16 17 **Setting**

18  
19  
20  
21 The municipality of São Caetano do Sul has a population of 161,000 inhabitants.<sup>21</sup> The city's  
22 population is older than the Brazilian population<sup>21</sup> and its Human Development Index is one  
23 of the highest in the country. Nearly all (97.4%) children aged 6-14 are in education and 31%  
24 of the population have completed higher education<sup>22</sup> (Brazilian national average is 11%).  
25  
26  
27  
28  
29

### 30 31 **Corona São Caetano platform**

32  
33 The objective of the platform was to offer clinical care for patients with flu syndrome and  
34 suspected COVID-19. Through the multimedia platform (website of phone call), patients  
35 could be triaged and guided in relation to their clinical needs and tested, without having to  
36 leave their homes or go to health facilities, unless seriously ill. This strategy aimed at  
37 reducing the workload in health units and the risk of SARS-CoV-2 transmission in the  
38 population served by these health units. Patients' GPs were informed of lab results and had  
39 access to clinical data stored in the platform. GPs were expected to call patients being  
40 assisted by the platform and provide medical assistance through home visits or at the primary  
41 care clinic if needed. In general, the drugs prescribed through the platform were restricted to  
42 analgesics and antipyretics. The platform was designed so that clinical information was  
43 collected in a standardized way for research purposes.  
44  
45  
46  
47  
48  
49  
50  
51  
52  
53

54 Residents of the municipality aged 12 years and older with suspected COVID-19 symptoms  
55 were encouraged, through local media reports, to contact the dedicated Corona São Caetano  
56 platform via the website or by phone. They were invited to complete an initial screening  
57  
58  
59  
60



1  
2  
3 questionnaire that included socio-demographic data; information on symptoms type, onset  
4 and duration; and recent contacts.  
5  
6  
7

8 Patients meeting the suspected COVID-19 case definition (i.e., having at least two of the  
9 following symptoms: fever, cough, sore throat, coryza, or change in/loss of smell (anosmia);  
10 or one of these symptoms plus at least two other symptoms consistent with COVID-19) were  
11 further evaluated, whilst people not meeting these criteria were reassured, advised to stay at  
12 home and contact the service again if they were to develop new symptoms or worsening of  
13 current ones. The case definition was developed in consultation with infectious disease and  
14 primary care specialists to encompass the known symptoms of COVID-19 and is similar to  
15 the Brazilian national case definition<sup>23</sup>. Patients were then called by a medical student to  
16 complete a risk assessment. All pregnant women, and patients meeting pre-defined triage  
17 criteria for severe disease (see Supplemental Material), were advised to attend a hospital  
18 service - either an emergency department or outpatient service, depending on availability.  
19 All other patients were offered a home visit for self-collection of a nasopharyngeal swab.  
20  
21  
22  
23  
24  
25  
26  
27  
28  
29

### 30 **Sample collection**

31  
32  
33 Patients self-collected nasopharyngeal swabs (NPS – both nostrils and throat) at their own  
34 homes under the supervision of trained healthcare personnel. We sent a link to an  
35 instructional video (<https://youtu.be/rWZzV2ZP7KY>) before the home visit to provide  
36 guidance on self-collection procedures. Nasopharyngeal swabs for the molecular detection of  
37 SARS-CoV-2 has been recommended as an alternative method of collection for samples from  
38 patients with suspected COVID-19<sup>24</sup>, as well as other respiratory diseases, and has the  
39 advantage of reducing the chance of aerosol transmission to healthcare professionals.  
40  
41  
42  
43  
44  
45  
46  
47  
48  
49  
50  
51  
52  
53  
54  
55  
56  
57  
58  
59  
60  
Healthcare personnel were instructed to maintain a distance of six feet from the patient and to  
wear personal protective equipment at all times. Samples were immediately put on a cool box  
between 2-8°C and stored at 4°C in a fridge until shipment to the lab within 24 hours.

### 53 **Follow-up procedures**

54  
55  
56  
57  
58  
59  
60  
Patients testing SARS-CoV-2 RT-PCR positive were followed up to 14 days<sup>25</sup> (a maximum  
of 7 phone calls) from completion of their initial questionnaire. They were contacted every 48  
hours by a medical student who completed another risk assessment and recorded any ongoing

1  
2  
3 or new symptoms. The purpose of the follow-up was to assess clinical evolution. Where  
4 patients were judged to be deteriorating or developing severe disease they were signposted to  
5 secondary care services. Patients testing RT-PCR negative were followed up by the primary  
6 health care program for their residential area. They were advised to contact the platform for a  
7 new consultation if they developed new symptoms. Starting on May 19<sup>th</sup>, when serological  
8 testing became available, RT-PCR-negative patients were re-contacted to offer antibody  
9 (IgG/IgM combined) testing 14 days after their initial registration as long as they had become  
10 asymptomatic.  
11  
12  
13  
14  
15  
16  
17

### 18 **Study dates**

19  
20  
21  
22 The Corona São Caetano programme was launched on 6th April 2020, with a one week pilot  
23 phase designed to test instruments before roll-out. For this analysis, we included all patients  
24 making their first contact with the programme in its first month, ie between 13th April and  
25 13th May 2020. The period of follow-up (last date of data extraction) was 4th June 2020, to  
26 account for the accrual period (three weeks) of possible hospitalizations in the last included  
27 patients.  
28  
29  
30  
31  
32  
33

### 34 **Laboratory methods**

35  
36  
37 Due to shortages of some reagents, we used two RT-PCR platforms at different times during  
38 the study: ALTONA RealStar® SARS-CoV-2 RT-PCR Kit 1.0 (Hamburg, Germany) and the  
39 Mico BioMed RT-qPCR kit (Seongnam, South Korea). For serology we tested 10µL of  
40 serum or plasma (equivalent in performance) using a qualitative rapid chromatographic  
41 immunoassay (Wondfo Biotech Co., Guangzhou, China), that jointly detects anti-SARS-  
42 CoV-2 IgG/IgM. The assay has been found to have a sensitivity of 81.5% and specificity of  
43 99.1% in a US study<sup>26</sup>. In our local validation, after two weeks of symptoms, the sensitivity  
44 in 59 RT-PCR confirmed cases was 94.9%, and specificity in 106 biobank samples from  
45 2019 was 100%.  
46  
47  
48  
49  
50  
51  
52  
53

### 54 **Statistical methods**

55  
56  
57 We estimated the contribution of our platform to total number of COVID-19 cases diagnosed  
58 in São Caetano do Sul. To do this, we compared the number of cases diagnosed in our  
59  
60

1  
2  
3 programme with official data released by the Municipal Department of Health in its daily  
4 bulletins (accessed here <https://coronavirus.saocaetanodosul.sp.gov.br>).

5  
6  
7  
8 Clinical and demographic data were extracted directly from the Corona São Caetano  
9 information system. To analyse clinical presentation, we first calculated the proportion and  
10 exact binomial 95% confidence intervals (CI) of cases reporting each symptom in the three  
11 testing groups: SARS-CoV-2 RT-PCR positive; RT-PCR negative / seropositive; and RT-  
12 PCR negative / seronegative. We next combined RT-PCR and serology positive cases to  
13 make a confirmed COVID-19 group, and those negative on both tests to make a SARS-CoV-  
14 2 negative control group. We express the association between each symptom and a positive  
15 COVID-19 diagnosis as odds ratios (OR) and 95% CIs.

16  
17  
18  
19  
20  
21  
22  
23  
24 Next, we assessed associations between RT-PCR cycle thresholds (Cts) and other clinical  
25 features. ALTONA and MiCo BioMed RT-PCR kits each separately amplify two different  
26 SARS-CoV-2 viral genes, as such each patient had two Ct values. There was a high  
27 concordance between Cts for the two genes within each kit (Figure S1), and we opted therefore  
28 to use the mean of the two Ct values for each patient in all analyses. We calculated univariable  
29 associations between Cts and age, sex, delay from symptom onset to NPS collection, and  
30 presenting symptoms using simple linear regression. We then built a multivariable linear  
31 regression model to assess independent associations between presenting symptoms and RT-  
32 PCR Cts. As age, sex, and time of swab collection may confound this relationship we included  
33 these variables, as well as the RT-PCR platform (ALTONA vs MiCo BioMed), as covariates  
34 in the model.

35  
36  
37  
38  
39  
40  
41  
42  
43  
44 For RT-PCR positive patients, hospitalizations and deaths were extracted from the study  
45 platform. To extend the follow-up period and to capture RT-PCR negative patients and those  
46 initially triaged to hospital (no study follow-up), hospitalization and vital status was  
47 confirmed by linkage with two administrative databases: the municipal epidemiological  
48 surveillance dataset, as well as the state-wide influenza-like illness notification system  
49 (SIVEP-Gripe). Linkage was last performed on 5<sup>th</sup> June 2020, 23 days after the last patient  
50 was enrolled, by the author SRPS who did not have access to the full analytic dataset. This  
51 author searched the SIVEP-Gripe system and the municipal epidemiological surveillance  
52 dataset using full name and date of birth. Categorical patient characteristics were compared  
53 between patients requiring and those not requiring hospitalization using a Chi-squared or  
54  
55  
56  
57  
58  
59  
60

1  
2  
3 Fisher exact test. Continuous variables were compared using the Wilcoxon rank sum test. A  
4 multivariate analysis was not conducted due to the small number of individuals experiencing  
5 this outcome.  
6  
7  
8  
9

10 The cohort sample included consecutive cases presenting to the Corona São Caetano program  
11 and a formal sample size calculation was not performed. Missing data were excluded. All  
12 analyses were conducted in R Software for Statistical Computing, version 3.6.3.<sup>27</sup>  
13  
14  
15

## 16 17 **Ethics**

18  
19  
20 The study was approved by the local ethics committee (Comissão de Ética para Análise de  
21 Projeto de Pesquisa - CAPPesq, protocol No. 13915, dated June 03, 2020). The committee  
22 waived the need for informed consent and allowed the development of an analytical dataset  
23 with no personal identification for the current analysis.  
24  
25  
26  
27  
28

## 29 **Patient and public involvement**

30  
31  
32 Patients were not involved in the planning of this research.  
33  
34  
35

## 36 **RESULTS**

### 37 38 39 **Epidemiological and programmatic indicators**

40  
41  
42 Over the study period, there were 2,073 presentations (49% phone call, 51% website), from  
43 2,011 individual patients, that met the criteria for a suspected COVID-19 case (See Figure 1  
44 for study flow). At initial phone interview, 132 (6%) potential cases were advised to go  
45 directly to a health service based on the triage questions, and 12 (0.6%) because of  
46 pregnancy. Only four (3%) of referred patients were admitted to hospital and none died.  
47  
48  
49  
50  
51

52  
53 In total 1,583 individual patients were tested with RT-PCR for SARS-CoV-2; 444 (28.0%,  
54 95%CI: 25.9-30.3) were positive. The proportion of positive results was stable over the study  
55 (Figure S2). Among the RT-PCR negative group, 604 (53% of 1,136) underwent serology  
56 testing, of whom 52 (8.6%, 95%CI: 6.6-11.1) were seropositive. The median [IQR] time from  
57 symptom onset to serology collection was 31 [26–37] days. The age-sex structure of patients  
58  
59  
60

1  
2  
3 being tested differed from the underlying population of São Caetano do Sul (Figure S3) with  
4 an overrepresentation of working-age adults and women. At the beginning of programme role  
5 out, 25% of notified COVID-19 cases in São Caetano do Sul were diagnosed in our  
6  
7 programme. Over the study period, adherence to the programme increased, and by May 13<sup>th</sup>,  
8  
9 2020, this figure had risen to 78%.  
10  
11

12  
13 Of 444 RT-PCR positive patients eligible for longitudinal follow-up, 326 (73%) had their  
14 final follow-up visit at least 14 days after their initial presentation. Of the seven possible  
15 follow-up questionnaires, 384 (86%) COVID-19 patients completed three or more, and 162  
16  
17 (36%) completed all seven.  
18  
19

### 20 21 22 **Participant characteristics**

23  
24 Patient characteristics are shown in Table 1. Although women were overrepresented in the  
25 cohort, there were proportionally more males in the RT-PCR positive and seropositive groups  
26 compared to the seronegative group. Of note, 55% of RT-PCR negative/seronegative patients  
27 had completed higher education compared to 35% RT-PCR-positive patients ( $p < 0.001$ , Chi-  
28 squared test). The median number of days from symptom onset to swab collection was 5.0  
29 (IQR, 4.0-7.0) among RT-PCR positive patients and 6.0 (IQR, 4.0-8.3) among RT-PCR  
30 negative/seropositive patients ( $p = 0.06$ , Wilcoxon rank sum) (Figure S4). Chronic  
31 respiratory disease was less frequent in RT-PCR positive than dual-negative patients.  
32  
33  
34  
35  
36  
37  
38  
39  
40

### 41 **Symptoms of COVID-19**

42  
43 The prevalence of individual symptoms at presentation is shown in Figure 2A stratified by  
44 final diagnostic category. The most frequent symptoms among RT-PCR and seropositive  
45 patients were headache (82% and 75%), myalgia (80% and 80%), cough (77% and 63%), and  
46 fatigue (77% and 79%). Anosmia was present in 56% and 63% of RT-PCR positive and  
47 seropositive patients, respectively, compared to 30% in those testing doubly negative. A  
48 similar pattern was observed for ageusia (53% and 53% versus 30%). Upper respiratory tract  
49 symptoms - including coryza, blocked nose, ageusia, and anosmia - were more frequent in  
50 younger people (Figure 2B). The evolution of symptoms over time among RT-PCR positive  
51 patients is shown in Figure S5.  
52  
53  
54  
55  
56  
57  
58  
59  
60

The odds ratios for testing positive for SARS-CoV-2 (RT-PCR or serology) associated with each presenting symptom are shown in Figure 3. The symptoms with strongest associations were anosmia (OR 3.3, 95%CI: 2.6-4.4), fever (3.0, 95%CI: 2.4-3.9) and ageusia (2.9, 95%CI: 2.3-3.8). The presence of sore throat (0.53, 95%CI: 0.41-0.68) and diarrhoea (0.72, 95%CI: 0.55-0.96) were associated with a negative SARS-CoV-2 test.

### **Associations between SARS-CoV-2 RT-PCR Cycle threshold (Ct) values, and demographic and clinical features**

Figure 4 shows the associations between mean RT-PCR cycle threshold and demographic features and symptoms at presentation (the median [IQR] time from presentation to swab was 1 [1-2] day). Older age was associated with lower cycle thresholds, with a change in mean Ct of -0.05 (95%CI -0.09 to -0.01) for each additional year of age. The mean difference in Ct value was -1.36 (95% CI -2.49 to -0.23) in men compared to women. For each doubling in the number of days from symptom onset to swab collection the mean Ct value increased by 3.28 (95%CI 2.33 to 4.03). Presenting symptoms of fever and arthralgia were associated with lower Cts, whereas anosmia, ageusia, vomiting, diarrhoea, and nausea were associated with higher Cts (Figure 4 and Table S1). After adjustment for age, sex, delay from symptom onset, and RT-PCR platform used, fever (-0.06, 95%CI: -2.11 to -0.001) and arthralgia (-1.24, 95%CI: -2.18 to -0.10) remained associated with lower Cts, and anosmia (2.21, 95%CI: 1.0-3.29), ageusia (1.96, 95%CI: 0.88-3.0), and diarrhoea (1.36, 95%CI: 0.12-2.61) with higher Cts (Table S1).

### **Hospitalizations and deaths**

Of the 444 RT-PCR positive patients, 30 (6.8%) had been hospitalized by 5<sup>th</sup> June 2020, when the database linkage was last updated, and three (0.7%) had died; in-hospital mortality was therefore 10% (3/30). In 28 cases the date of admission was available. The median time from symptom onset to hospital admission was 7 (range 2 to 14) days. Among 1,136 RT-PCR-negative patients, six (0.5%) had been admitted to hospital. One (<0.01% of 1,136) of these six patients died. None of the 604 RT-PCR negative patients that underwent serology were admitted to hospital or died. Table 2 compares patient characteristics by hospitalization status. Notably, hospitalized patients were older, had more cardiovascular comorbidities and were more frequently obese.



## DISCUSSION

We present a community-based cohort of suspected COVID-19 cases recruited through a primary care initiative in the Brazilian municipality of São Caetano do Sul. Offering RT-PCR testing to all patients presenting with symptoms compatible with COVID-19, the positivity rate was 28%, with 8.6% of those testing negative subsequently found to be seropositive - i.e. > 35% of the cohort had a diagnosis of COVID-19. Anosmia, ageusia, and self-reported fever provided the greatest diagnostic value in identifying COVID-19. The rate of hospitalization and deaths among RT-PCR positive patients was low, at 6.8% and 0.7%, respectively. Our results provide important information on the clinical presentation, diagnostic testing and natural history of COVID-19 identified in the community.

The profile of suspected cases that tested positive for COVID-19 differed in some important respects from those testing negative. The lower educational level among positive cases suggests that, in São Caetano do Sul, the risk of exposure to COVID-19 follows a socioeconomic gradient, consistent with other findings from Brazil<sup>13,28</sup>. Although more women presented to the platform, proportionally more men tested positive, consistent with data from São Paulo showing a higher seroprevalence in men than women<sup>11</sup>, but also potentially reflecting different health seeking behaviours. Comorbidities were mostly similar, although chronic respiratory disease was less frequent in those testing RT-PCR positive. This may be due to a proportion of presentations in those with chronic respiratory disease being explained by exacerbations of their underlying pathology from aetiologies other than SARS-CoV-2, as well as higher anxiety about COVID-19 in those with pre-existing respiratory disease.

Extrapolating the seropositivity rate among RT-PCR negative patients to the 532 who were not tested with serology, we estimate that an additional 46 seropositive cases would have been identified. As such, 18% (98/542) of COVID-19 cases were missed by RT-PCR in the setting of symptomatic presentations to primary care. This is similar to a pooled analysis showing a false-negative rate for RT-PCR of 20% at three days post-symptom onset.<sup>29</sup> Viral load peaks around the time of symptom onset and remains high over the first symptomatic week (also see Figure 4A).<sup>30,31</sup> Consistent with this, we found a slightly longer delay to swab

1  
2  
3 collection (due to delay in presentation to the platform) in RT-PCR false-negative patients  
4 than RT-PCR positive patients (Figure S4).  
5  
6  
7

8 COVID-19 presents in a similar way to other respiratory viral illnesses. Indeed, in our cohort  
9 the most common symptoms of COVID-19 - such as cough, fatigue, headache, etc. - were  
10 reported with a similar frequency among patients testing negative. It is therefore important to  
11 have identified anosmia, ageusia, self-reported fever, myalgia, and anorexia as the symptoms  
12 with greatest value in the differential diagnosis of COVID-19 in primary care. This is  
13 consistent with systematic review evidence highlighting anosmia and ageusia as key  
14 diagnostic features of COVID-19<sup>32</sup>. It is of note that 30% of jointly RT-PCR and serology  
15 negative patients reported these symptoms, indicating that although indicative of COVID-19,  
16 the specificity of these symptoms is not high enough to rule in the diagnosis alone. Sore  
17 throat and diarrhoea - both considered symptoms of COVID-19 in other settings –<sup>33</sup> were  
18 more frequently due to other possible aetiologies in this primary care context.  
19  
20  
21  
22  
23  
24  
25  
26  
27  
28

29 These results are robust for a number of reasons. Firstly, our sample is representative of the  
30 population of interest - i.e. consecutive patients with suspected COVID-19 in the community  
31 - instead of extrapolating from hospital cases. Symptom data were collected prospectively,  
32 eliminating recall or interviewer bias. Finally, we have a control group of patients who were  
33 negative for both RT-PCR and serology, minimizing misclassification due to false negative  
34 RT-PCR.  
35  
36  
37  
38  
39  
40

41 In our study, the proportion of patients with a positive SARS-CoV-2 RT-PCR requiring  
42 hospitalization was low (7%). Early reports from China were of 13.8% of cases being  
43 severe<sup>34</sup>, but this value was lower when under ascertainment of cases was accounted for.<sup>35,36</sup>  
44 This is because our cohort reflects mild to moderate cases, as severely ill patients are likely to  
45 have attended hospital directly. As such, only 3% of patients we triaged to attend health  
46 services were ultimately hospitalized, possibly due to self-selection of patients presenting to  
47 our service. Supporting this, our overall case fatality ratio among RT-PCR positive patients  
48 was 0.7%. The rate of hospitalization was lower (0.5%) in those testing PCR-negative. These  
49 patients were admitted with a severe acute respiratory syndrome of an aetiology other than  
50 SARS-CoV-2. The 14-fold higher admission rate among PCR-positive cases highlights the  
51 importance of molecular testing for SARS-CoV-2 in patients presenting with features of  
52 respiratory viral illness to primary care.  
53  
54  
55  
56  
57  
58  
59  
60



1  
2  
3  
4  
5 As expected, the main determinant of Ct was the delay between symptom onset and swab  
6 collection, mostly due to the delay in reporting to the platform. After adjusting for this, as  
7 well as age and sex, we found that a self-reported fever and arthralgia were associated with  
8 lower Cts. The presence of these symptoms may identify patients with a higher viral load in  
9 the community. However, these results should be seen as purely exploratory, and the wide  
10 spread of Ct values around the regression line precludes a direct clinical application at  
11 present.  
12  
13  
14  
15  
16  
17

18  
19 Our study has some limitations. Firstly, serology was not performed on all RT-PCR negative  
20 patients due to on-going symptoms, loss to follow-up, or patient refusal. Of note, none of the  
21 RT-PCR-negative patients that were admitted to hospital underwent serology testing. This  
22 suggests that patients who were not tested with serology may have had a higher prevalence of  
23 COVID-19 than those that were tested. In addition, imperfect serology test performance  
24 (81% sensitivity)<sup>26</sup> will introduced false-negative results. Taken together, these biases may  
25 have underestimated the true seroprevalence among RT-PCR-negative cases, as well as the  
26 false-negative rate of RT-PCR. The latter calculation may also have been influenced by the  
27 inclusion of RT-PCR positive patients in the denominator, introducing an incorporation bias.<sup>37</sup>  
28  
29 Furthermore, the association between symptoms and COVID-19 diagnosis was based on the  
30 comparison with doubly PCR and serology negative individuals. It is not clear how the  
31 exclusion of individuals that did not undergo serology testing would have influenced these  
32 associations. Finally, patients were not involved in the planning of the Corona platform or the  
33 research proposal.  
34  
35  
36  
37  
38  
39  
40  
41  
42  
43  
44

45 A key strength to our study relates to the provision of primary healthcare in Brazil and its  
46 symbiosis with medical training nationwide. Primary health care - within the family health  
47 strategy (*Estratégia Saúde da Família*) - is centered around a healthcare unit with a multi-  
48 professional team that is responsible for all residents in the immediate catchment area<sup>8</sup>. São  
49 Caetano do Sul has enough GP units within the family health strategy that all residents have  
50 access to primary care. Medical students from the municipal university (USCS) are integrated  
51 into the primary healthcare teams and progressively trained from the first year of medical  
52 school. Our initiative took advantage of this existing system, with the addition of an online  
53 platform allowing remote clinical assessment and follow-up. The suspension of normal  
54 clinical training at the medical school provided the workforce. The partnership with the  
55  
56  
57  
58  
59  
60

1  
2  
3 University of São Paulo, which provided the laboratory diagnostics, created the unique  
4 opportunity to establish our prospective community cohort of suspected and confirmed  
5 COVID-19 cases. But we believe that this infrastructure could be implemented in other  
6 regions with less resources. Other respiratory disease such as influenza, measles, or  
7 tuberculosis may benefit from similar approach. However, further evaluation of the impact of  
8 the Corona Platform are required.  
9  
10  
11  
12  
13  
14

## 15 **CONCLUSION**

16  
17  
18 Systematic testing of all suspected COVID-19 cases was feasible within primary care  
19 services in a Brazilian municipality. Anosmia, ageusia, and fever provide the greatest  
20 diagnostic discrimination from other similar primary care presentations. Home-care is a valid  
21 approach for most of these patients with a low rate of hospitalization and death.  
22 Our programme model – integrating multimedia technology, telehealth with universal access  
23 to primary care – may be successful in other contexts.  
24  
25  
26  
27  
28  
29

## 30 **CONTRIBUTION STATEMENT**

31  
32  
33  
34 FEL, MCMC, SFC, MC, RB, and ECS conceived and designed the study. FEL, RMZG, and  
35 JCSB provided clinical oversight and supervision of medical students. FEL, MCMC, LFB,  
36 HD, OT, LC, and SRPS collected and curated the data. MCMC, TRTM, LSVB, and LCOS  
37 performed the laboratory analysis. LFB performed the formal statistical analysis with  
38 assistance from FEL, SRPS, NDEA, PM, ECS and OT. LFB, FEL, PM and ECS wrote the  
39 first draft, and all authors reviewed, contributed to and approved the final version.  
40  
41  
42  
43  
44  
45

## 46 **CONFLICTS OF INTEREST STATEMENT**

47  
48  
49 The authors have no conflicts of interests. FL, RG, and JB were involved in providing  
50 clinical care within the Corona São Caetano Platform.  
51  
52  
53

## 54 **FUNDING STATEMENT**

55  
56  
57  
58 The municipal health department of São Caetano do Sul (Secretaria Municipal de Saúde da  
59 Prefeitura de São Caetano do Sul) funded the establishment and implementation of the  
60

1  
2  
3 platform. We also acknowledge an award from FAPESP (2018/14389-0) and the UK Medical  
4 Research Council (MR/S0195/1) to the Brazil-UK Centre for Arbovirus Discovery,  
5 Diagnosis, Genomics and Epidemiology (CADDE).  
6  
7  
8

## 9 **DATA SHARING STATEMENT**

11 Anonymized data are available at  
12 [https://figshare.com/articles/dataset/Clinical\\_features\\_and\\_natural\\_history\\_of\\_the\\_first\\_2\\_07\\_3\\_suspected\\_COVID-19\\_cases\\_in\\_the\\_Corona\\_S\\_o\\_Caetano\\_primary\\_care\\_programme\\_a\\_prospective\\_cohort\\_study/13322474](https://figshare.com/articles/dataset/Clinical_features_and_natural_history_of_the_first_2_07_3_suspected_COVID-19_cases_in_the_Corona_S_o_Caetano_primary_care_programme_a_prospective_cohort_study/13322474)  
13  
14  
15  
16  
17  
18  
19  
20

## 21 **REFERENCES**

- 22 1. World Health Organization. (2020). Pneumonia of unknown cause – China.  
23  
24 (https://www.who.int/csr/don/05-january-2020-pneumonia-of-unkown-cause-china/en/, accessed 2020-06-18).  
25  
26  
27  
28  
29  
30  
31
- 32 2. World Health Organization. Critical preparedness, readiness and response  
33 actions for COVID-19 (Interim Guidance) (https://www.who.int/publications-detail/critical-preparedness-readiness-and-response-actions-for-covid-19,  
34  
35  
36  
37  
38  
39  
40  
41  
42  
43  
44  
45  
46  
47  
48  
49  
50  
51  
52
- 53 3. Bedford, J. et al. COVID-19: towards controlling of a pandemic. *The Lancet* **395**,  
54  
55  
56  
57  
58  
59  
60  
61  
62  
63  
64  
65  
66  
67  
68  
69  
70  
71  
72  
73  
74  
75  
76  
77  
78  
79  
80  
81  
82  
83  
84  
85  
86  
87  
88  
89  
90  
91  
92  
93  
94  
95  
96  
97  
98  
99  
100  
101  
102  
103  
104  
105  
106  
107  
108  
109  
110  
111  
112  
113  
114  
115  
116  
117  
118  
119  
120  
121  
122  
123  
124  
125  
126  
127  
128  
129  
130  
131  
132  
133  
134  
135  
136  
137  
138  
139  
140  
141  
142  
143  
144  
145  
146  
147  
148  
149  
150  
151  
152  
153  
154  
155  
156  
157  
158  
159  
160  
161  
162  
163  
164  
165  
166  
167  
168  
169  
170  
171  
172  
173  
174  
175  
176  
177  
178  
179  
180  
181  
182  
183  
184  
185  
186  
187  
188  
189  
190  
191  
192  
193  
194  
195  
196  
197  
198  
199  
200  
201  
202  
203  
204  
205  
206  
207  
208  
209  
210  
211  
212  
213  
214  
215  
216  
217  
218  
219  
220  
221  
222  
223  
224  
225  
226  
227  
228  
229  
230  
231  
232  
233  
234  
235  
236  
237  
238  
239  
240  
241  
242  
243  
244  
245  
246  
247  
248  
249  
250  
251  
252  
253  
254  
255  
256  
257  
258  
259  
260  
261  
262  
263  
264  
265  
266  
267  
268  
269  
270  
271  
272  
273  
274  
275  
276  
277  
278  
279  
280  
281  
282  
283  
284  
285  
286  
287  
288  
289  
290  
291  
292  
293  
294  
295  
296  
297  
298  
299  
300  
301  
302  
303  
304  
305  
306  
307  
308  
309  
310  
311  
312  
313  
314  
315  
316  
317  
318  
319  
320  
321  
322  
323  
324  
325  
326  
327  
328  
329  
330  
331  
332  
333  
334  
335  
336  
337  
338  
339  
340  
341  
342  
343  
344  
345  
346  
347  
348  
349  
350  
351  
352  
353  
354  
355  
356  
357  
358  
359  
360  
361  
362  
363  
364  
365  
366  
367  
368  
369  
370  
371  
372  
373  
374  
375  
376  
377  
378  
379  
380  
381  
382  
383  
384  
385  
386  
387  
388  
389  
390  
391  
392  
393  
394  
395  
396  
397  
398  
399  
400  
401  
402  
403  
404  
405  
406  
407  
408  
409  
410  
411  
412  
413  
414  
415  
416  
417  
418  
419  
420  
421  
422  
423  
424  
425  
426  
427  
428  
429  
430  
431  
432  
433  
434  
435  
436  
437  
438  
439  
440  
441  
442  
443  
444  
445  
446  
447  
448  
449  
450  
451  
452  
453  
454  
455  
456  
457  
458  
459  
460  
461  
462  
463  
464  
465  
466  
467  
468  
469  
470  
471  
472  
473  
474  
475  
476  
477  
478  
479  
480  
481  
482  
483  
484  
485  
486  
487  
488  
489  
490  
491  
492  
493  
494  
495  
496  
497  
498  
499  
500  
501  
502  
503  
504  
505  
506  
507  
508  
509  
510  
511  
512  
513  
514  
515  
516  
517  
518  
519  
520  
521  
522  
523  
524  
525  
526  
527  
528  
529  
530  
531  
532  
533  
534  
535  
536  
537  
538  
539  
540  
541  
542  
543  
544  
545  
546  
547  
548  
549  
550  
551  
552  
553  
554  
555  
556  
557  
558  
559  
560  
561  
562  
563  
564  
565  
566  
567  
568  
569  
570  
571  
572  
573  
574  
575  
576  
577  
578  
579  
580  
581  
582  
583  
584  
585  
586  
587  
588  
589  
590  
591  
592  
593  
594  
595  
596  
597  
598  
599  
600  
601  
602  
603  
604  
605  
606  
607  
608  
609  
610  
611  
612  
613  
614  
615  
616  
617  
618  
619  
620  
621  
622  
623  
624  
625  
626  
627  
628  
629  
630  
631  
632  
633  
634  
635  
636  
637  
638  
639  
640  
641  
642  
643  
644  
645  
646  
647  
648  
649  
650  
651  
652  
653  
654  
655  
656  
657  
658  
659  
660  
661  
662  
663  
664  
665  
666  
667  
668  
669  
670  
671  
672  
673  
674  
675  
676  
677  
678  
679  
680  
681  
682  
683  
684  
685  
686  
687  
688  
689  
690  
691  
692  
693  
694  
695  
696  
697  
698  
699  
700  
701  
702  
703  
704  
705  
706  
707  
708  
709  
710  
711  
712  
713  
714  
715  
716  
717  
718  
719  
720  
721  
722  
723  
724  
725  
726  
727  
728  
729  
730  
731  
732  
733  
734  
735  
736  
737  
738  
739  
740  
741  
742  
743  
744  
745  
746  
747  
748  
749  
750  
751  
752  
753  
754  
755  
756  
757  
758  
759  
760  
761  
762  
763  
764  
765  
766  
767  
768  
769  
770  
771  
772  
773  
774  
775  
776  
777  
778  
779  
780  
781  
782  
783  
784  
785  
786  
787  
788  
789  
790  
791  
792  
793  
794  
795  
796  
797  
798  
799  
800  
801  
802  
803  
804  
805  
806  
807  
808  
809  
810  
811  
812  
813  
814  
815  
816  
817  
818  
819  
820  
821  
822  
823  
824  
825  
826  
827  
828  
829  
830  
831  
832  
833  
834  
835  
836  
837  
838  
839  
840  
841  
842  
843  
844  
845  
846  
847  
848  
849  
850  
851  
852  
853  
854  
855  
856  
857  
858  
859  
860  
861  
862  
863  
864  
865  
866  
867  
868  
869  
870  
871  
872  
873  
874  
875  
876  
877  
878  
879  
880  
881  
882  
883  
884  
885  
886  
887  
888  
889  
890  
891  
892  
893  
894  
895  
896  
897  
898  
899  
900  
901  
902  
903  
904  
905  
906  
907  
908  
909  
910  
911  
912  
913  
914  
915  
916  
917  
918  
919  
920  
921  
922  
923  
924  
925  
926  
927  
928  
929  
930  
931  
932  
933  
934  
935  
936  
937  
938  
939  
940  
941  
942  
943  
944  
945  
946  
947  
948  
949  
950  
951  
952  
953  
954  
955  
956  
957  
958  
959  
960  
961  
962  
963  
964  
965  
966  
967  
968  
969  
970  
971  
972  
973  
974  
975  
976  
977  
978  
979  
980  
981  
982  
983  
984  
985  
986  
987  
988  
989  
990  
991  
992  
993  
994  
995  
996  
997  
998  
999  
1000
- 53 4. Hellewell, J. et al. Feasibility of controlling COVID-19 outbreaks by isolation of  
54 cases and contacts. *Lancet Glob Health* **8**, e488–e496 (2020).  
55  
56  
57  
58  
59  
60
- 61 5. Dunlop, C., Howe, A., Li, D. & Allen, L. N. The coronavirus outbreak: the central  
62 role of primary care in emergency preparedness and response. *BJGP Open* **4**,  
63  
64  
65  
66  
67  
68  
69  
70  
71  
72  
73  
74  
75  
76  
77  
78  
79  
80  
81  
82  
83  
84  
85  
86  
87  
88  
89  
90  
91  
92  
93  
94  
95  
96  
97  
98  
99  
100  
101  
102  
103  
104  
105  
106  
107  
108  
109  
110  
111  
112  
113  
114  
115  
116  
117  
118  
119  
120  
121  
122  
123  
124  
125  
126  
127  
128  
129  
130  
131  
132  
133  
134  
135  
136  
137  
138  
139  
140  
141  
142  
143  
144  
145  
146  
147  
148  
149  
150  
151  
152  
153  
154  
155  
156  
157  
158  
159  
160  
161  
162  
163  
164  
165  
166  
167  
168  
169  
170  
171  
172  
173  
174  
175  
176  
177  
178  
179  
180  
181  
182  
183  
184  
185  
186  
187  
188  
189  
190  
191  
192  
193  
194  
195  
196  
197  
198  
199  
200  
201  
202  
203  
204  
205  
206  
207  
208  
209  
210  
211  
212  
213  
214  
215  
216  
217  
218  
219  
220  
221  
222  
223  
224  
225  
226  
227  
228  
229  
230  
231  
232  
233  
234  
235  
236  
237  
238  
239  
240  
241  
242  
243  
244  
245  
246  
247  
248  
249  
250  
251  
252  
253  
254  
255  
256  
257  
258  
259  
260  
261  
262  
263  
264  
265  
266  
267  
268  
269  
270  
271  
272  
273  
274  
275  
276  
277  
278  
279  
280  
281  
282  
283  
284  
285  
286  
287  
288  
289  
290  
291  
292  
293  
294  
295  
296  
297  
298  
299  
300  
301  
302  
303  
304  
305  
306  
307  
308  
309  
310  
311  
312  
313  
314  
315  
316  
317  
318  
319  
320  
321  
322  
323  
324  
325  
326  
327  
328  
329  
330  
331  
332  
333  
334  
335  
336  
337  
338  
339  
340  
341  
342  
343  
344  
345  
346  
347  
348  
349  
350  
351  
352  
353  
354  
355  
356  
357  
358  
359  
360  
361  
362  
363  
364  
365  
366  
367  
368  
369  
370  
371  
372  
373  
374  
375  
376  
377  
378  
379  
380  
381  
382  
383  
384  
385  
386  
387  
388  
389  
390  
391  
392  
393  
394  
395  
396  
397  
398  
399  
400  
401  
402  
403  
404  
405  
406  
407  
408  
409  
410  
411  
412  
413  
414  
415  
416  
417  
418  
419  
420  
421  
422  
423  
424  
425  
426  
427  
428  
429  
430  
431  
432  
433  
434  
435  
436  
437  
438  
439  
440  
441  
442  
443  
444  
445  
446  
447  
448  
449  
450  
451  
452  
453  
454  
455  
456  
457  
458  
459  
460  
461  
462  
463  
464  
465  
466  
467  
468  
469  
470  
471  
472  
473  
474  
475  
476  
477  
478  
479  
480  
481  
482  
483  
484  
485  
486  
487  
488  
489  
490  
491  
492  
493  
494  
495  
496  
497  
498  
499  
500  
501  
502  
503  
504  
505  
506  
507  
508  
509  
510  
511  
512  
513  
514  
515  
516  
517  
518  
519  
520  
521  
522  
523  
524  
525  
526  
527  
528  
529  
530  
531  
532  
533  
534  
535  
536  
537  
538  
539  
540  
541  
542  
543  
544  
545  
546  
547  
548  
549  
550  
551  
552  
553  
554  
555  
556  
557  
558  
559  
560  
561  
562  
563  
564  
565  
566  
567  
568  
569  
570  
571  
572  
573  
574  
575  
576  
577  
578  
579  
580  
581  
582  
583  
584  
585  
586  
587  
588  
589  
590  
591  
592  
593  
594  
595  
596  
597  
598  
599  
600  
601  
602  
603  
604  
605  
606  
607  
608  
609  
610  
611  
612  
613  
614  
615  
616  
617  
618  
619  
620  
621  
622  
623  
624  
625  
626  
627  
628  
629  
630  
631  
632  
633  
634  
635  
636  
637  
638  
639  
640  
641  
642  
643  
644  
645  
646  
647  
648  
649  
650  
651  
652  
653  
654  
655  
656  
657  
658  
659  
660  
661  
662  
663  
664  
665  
666  
667  
668  
669  
670  
671  
672  
673  
674  
675  
676  
677  
678  
679  
680  
681  
682  
683  
684  
685  
686  
687  
688  
689  
690  
691  
692  
693  
694  
695  
696  
697  
698  
699  
700  
701  
702  
703  
704  
705  
706  
707  
708  
709  
710  
711  
712  
713  
714  
715  
716  
717  
718  
719  
720  
721  
722  
723  
724  
725  
726  
727  
728  
729  
730  
731  
732  
733  
734  
735  
736  
737  
738  
739  
740  
741  
742  
743  
744  
745  
746  
747  
748  
749  
750  
751  
752  
753  
754  
755  
756  
757  
758  
759  
760  
761  
762  
763  
764  
765  
766  
767  
768  
769  
770  
771  
772  
773  
774  
775  
776  
777  
778  
779  
780  
781  
782  
783  
784  
785  
786  
787  
788  
789  
790  
791  
792  
793  
794  
795  
796  
797  
798  
799  
800  
801  
802  
803  
804  
805  
806  
807  
808  
809  
810  
811  
812  
813  
814  
815  
816  
817  
818  
819  
820  
821  
822  
823  
824  
825  
826  
827  
828  
829  
830  
831  
832  
833  
834  
835  
836  
837  
838  
839  
840  
841  
842  
843  
844  
845  
846  
847  
848  
849  
850  
851  
852  
853  
854  
855  
856  
857  
858  
859  
860  
861  
862  
863  
864  
865  
866  
867  
868  
869  
870  
871  
872  
873  
874  
875  
876  
877  
878  
879  
880  
881  
882  
883  
884  
885  
886  
887  
888  
889  
890  
891  
892  
893  
894  
895  
896  
897  
898  
899  
900  
901  
902  
903  
904  
905  
906  
907  
908  
909  
910  
911  
912  
913  
914  
915  
916  
917  
918  
919  
920  
921  
922  
923  
924  
925  
926  
927  
928  
929  
930  
931  
932  
933  
934  
935  
936  
937  
938  
939  
940  
941  
942  
943  
944  
945  
946  
947  
948  
949  
950  
951  
952  
953  
954  
955  
956  
957  
958  
959  
960  
961  
962  
963  
964  
965  
966  
967  
968  
969  
970  
971  
972  
973  
974  
975  
976  
977  
978  
979  
980  
981  
982  
983  
984  
985  
986  
987  
988  
989  
990  
991  
992  
993  
994  
995  
996  
997  
998  
999  
1000

- 1  
2  
3 6. World Health Organization. Regional Office for the Western Pacific. (2020). Role  
4 of primary care in the COVID-19 response. (  
5  
6  
7  
8 <https://apps.who.int/iris/handle/10665/331921>, accessed 15 June, 2020).  
9
- 10  
11 7. Redwood-Campbell, L. & Abrahams, J. Primary Health care and Disasters—The  
12  
13 Current State of the Literature: What We Know, Gaps and Next Steps. *Prehosp.*  
14  
15  
16 *Disaster med.* **26**, 184–191 (2011).  
17
- 18  
19 8. Macinko, J. & Harris, M. J. Brazil's Family Health Strategy — Delivering  
20  
21  
22 Community-Based Primary Care in a Universal Health System. *NEJM* **372**,  
23  
24  
25 2177–2181 (2015).  
26  
27
- 28  
29 9. World Health Organization. Situation report 27 (2020).  
30  
31 ([https://www.who.int/emergencies/diseases/novel-coronavirus-2019/situation-](https://www.who.int/emergencies/diseases/novel-coronavirus-2019/situation-reports)  
32  
33 [reports](https://www.who.int/emergencies/diseases/novel-coronavirus-2019/situation-reports), accessed 15 June 2020).  
34
- 35  
36 10. Brazilian Ministry of Health. (<https://covid.saude.gov.br/>).  
37
- 38  
39 11. Buss, L. F. et al. COVID-19 herd immunity in the Brazilian Amazon.  
40  
41 <http://medrxiv.org/lookup/doi/10.1101/2020.09.16.20194787> (2020)  
42  
43 doi:10.1101/2020.09.16.20194787.  
44
- 45  
46 12. de Souza, W. M. et al. Epidemiological and clinical characteristics of the COVID-  
47  
48  
49 19 epidemic in Brazil. *Nat Hum Behav* **4**, 856–865 (2020).  
50
- 51  
52 13. Hallal, P. C. et al. SARS-CoV-2 antibody prevalence in Brazil: results from two  
53  
54  
55 successive nationwide serological household surveys. *The Lancet Global Health*  
56  
57  
58 S2214109X20303879 (2020) doi:10.1016/S2214-109X(20)30387-9.  
59  
60

- 1  
2  
3 14. Docherty, A. B. et al. Features of 20 133 UK patients in hospital with covid-19  
4 using the ISARIC WHO Clinical Characterisation Protocol: prospective  
5 observational cohort study. *BMJ* m1985 (2020) doi:10.1136/bmj.m1985.  
6  
7  
8  
9  
10 15. Richardson, S. et al. Presenting Characteristics, Comorbidities, and Outcomes  
11 Among 5700 Patients Hospitalized With COVID-19 in the New York City Area.  
12 *JAMA* **323**, 2052 (2020).  
13  
14  
15  
16 16. Zhou, F. et al. Clinical course and risk factors for mortality of adult inpatients with  
17 COVID-19 in Wuhan, China: a retrospective cohort study. *The Lancet* **395**, 1054–  
18 1062 (2020).  
19  
20  
21  
22  
23  
24 17. Rauh, A. L. & Linder, J. A. Covid-19 care before, during, and beyond the hospital.  
25 *BMJ* m2035 (2020) doi:10.1136/bmj.m2035.  
26  
27  
28  
29 18. Lapostolle, F. et al. Clinical features of 1487 COVID-19 patients with outpatient  
30 management in the Greater Paris: the COVID-call study. *Intern Emerg Med* **15**,  
31 813–817 (2020).  
32  
33  
34  
35  
36  
37 19. Mizrahi, B. et al. Longitudinal symptom dynamics of COVID-19 infection in  
38 primary care. <http://medrxiv.org/lookup/doi/10.1101/2020.07.13.20151795> (2020)  
39 doi:10.1101/2020.07.13.20151795.  
40  
41  
42  
43  
44 20. Williamson, E. J. et al. Factors associated with COVID-19-related death using  
45 OpenSAFELY. *Nature* **584**, 430–436 (2020).  
46  
47  
48  
49  
50 21. Instituto Brasileiro de Geografia e Estatística (IBGE). (2020). São Caetano do  
51 Sul / Panorama. ([https://cidades.ibge.gov.br/brasil/sp/sao-caetano-do-](https://cidades.ibge.gov.br/brasil/sp/sao-caetano-do-sul/panorama)  
52 [sul/panorama](https://cidades.ibge.gov.br/brasil/sp/sao-caetano-do-sul/panorama)).  
53  
54  
55  
56  
57  
58  
59  
60

- 1  
2  
3  
4 22. Human Development Atlas Brazil. (2020). São Caetano do Sul  
5  
6  
7 ([http://atlasbrasil.org.br/2013/pt/perfil\\_m/sao-caetano-do-sul\\_sp](http://atlasbrasil.org.br/2013/pt/perfil_m/sao-caetano-do-sul_sp)).  
8  
9 23. Brazilian COVID-19 case definition and notification criteria. Brazilian Ministry of  
10  
11 Health (<https://coronavirus.saude.gov.br/definicao-de-caso-e-notificacao>).  
12  
13 24. Akmatov, M. K., Gatzemeier, A., Schughart, K. & Pessler, F. Equivalence of Self-  
14  
15 and Staff-Collected Nasal Swabs for the Detection of Viral Respiratory  
16  
17 Pathogens. *PLoS ONE* **7**, e48508 (2012).  
18  
19 25. Walsh, K. A. et al. SARS-CoV-2 detection, viral load and infectivity over the  
20  
21 course of an infection. *Journal of Infection* **81**, 357–371 (2020).  
22  
23  
24 26. Whitman, J. D. et al. Test performance evaluation of SARS-CoV-2 serological  
25  
26 assays. medRxiv 2020.04.25.20074856 (2020)  
27  
28 doi:10.1101/2020.04.25.20074856.  
29  
30  
31 27. R Core Team. R: A language and environment for statistical computing. R  
32  
33 Foundation for Statistical Computing, Vienna, Austria. URL [https://www.R-](https://www.R-project.org/)  
34  
35 [project.org/](https://www.R-project.org/). (2019).  
36  
37  
38 28. Baqui, P., Bica, I., Marra, V., Ercole, A. & van der Schaar, M. Ethnic and regional  
39  
40 variations in hospital mortality from COVID-19 in Brazil: a cross-sectional  
41  
42 observational study. *The Lancet Global Health* **8**, e1018–e1026 (2020).  
43  
44  
45 29. Kucirka, L. M., Lauer, S. A., Laeyendecker, O., Boon, D. & Lessler, J. Variation in  
46  
47 False-Negative Rate of Reverse Transcriptase Polymerase Chain Reaction–  
48  
49 Based SARS-CoV-2 Tests by Time Since Exposure. *Ann Int Med* M20-1495  
50  
51 (2020) doi:10.7326/M20-1495.  
52  
53  
54  
55  
56  
57  
58  
59  
60

- 1  
2  
3 30. To, K. K.-W. et al. Temporal profiles of viral load in posterior oropharyngeal  
4 saliva samples and serum antibody responses during infection by SARS-CoV-2:  
5 an observational cohort study. *Lancet Inf Dis* **20**, 565–574 (2020).  
6  
7  
8  
9  
10  
11 31. He, X. et al. Temporal dynamics in viral shedding and transmissibility of COVID-  
12 19. *Nat Med* **26**, 672–675 (2020).  
13  
14  
15  
16  
17 32. Carpenter, C. R., Mudd, P. A., West, C. P., Wilber, E. & Wilber, S. T. Diagnosing  
18 COVID-19 in the Emergency Department: A Scoping Review of Clinical  
19 Examinations, Laboratory Tests, Imaging Accuracy, and Biases. *Acad Emerg*  
20 *Med* **27**, 653–670 (2020).  
21  
22  
23  
24  
25  
26  
27  
28  
29 33. Vetter, P. et al. Clinical features of covid-19. *BMJ* m1470 (2020)  
30 doi:10.1136/bmj.m1470.  
31  
32  
33 34. T. Team, Vital Surveillances: The Epidemiological Characteristics of an Outbreak  
34 of 2019 Novel Coronavirus Diseases (COVID-19)-China. *China CDC Weekly* **2**,  
35 113–122 (2020).  
36  
37  
38  
39  
40  
41 35. Salje, H. et al. Estimating the burden of SARS-CoV-2 in France. *Science*  
42 eabc3517 (2020) doi:10.1126/science.abc3517.  
43  
44  
45  
46 36. Verity, R. et al. Estimates of the severity of coronavirus disease 2019: a model-  
47 based analysis. *Lancet Infect Dis* **20**, 669–677 (2020).  
48  
49  
50  
51 37. Worster, A. & Carpenter, C. Incorporation bias in studies of diagnostic tests: how  
52 to avoid being biased about bias. *CJEM* **10**, 174–175 (2008).  
53  
54  
55  
56  
57  
58  
59  
60

1  
2  
3  
4  
5  
6  
7  
8  
9  
10  
11  
12  
13  
14  
15  
16  
17  
18  
19  
20  
21  
22  
23  
24  
25  
26  
27  
28  
29  
30  
31  
32  
33  
34  
35  
36  
37  
38  
39  
40  
41  
42  
43  
44  
45  
46  
47  
48  
49  
50  
51  
52  
53  
54  
55  
56  
57  
58  
59  
60

For peer review only



## TABLE LEGENDS

**Table 1 Demographic and clinical characteristics of 1,048 suspected COVID-19 cases undergoing diagnostic testing in the Corona São Caetano program.** \* Security, emergency services, supermarket, public transport, and pharmacy workers. IQR: interquartile range; HCW: health care workers, COPD: chronic obstructive pulmonary disease. Missing data – educational level 2; essential occupation 2; body mass index 4; cardiovascular disease 28; diabetes 31 mellitus; chronic resp. disease 65; chronic kidney disease 27; COPD 28. P-values calculated by Chi-squared, Fisher exact, or Wilcoxon rank sum.

**Table 2 Characteristics of RT-PCR positive patients stratified by hospitalization status.** Missing data – body mass index 2; cardiovascular disease 12; diabetes mellitus 12; chronic respiratory disease 29; COPD 11; chronic kidney disease 12; COPD - chronic obstructive pulmonary disease; IQR - interquartile range.

## FIGURE LEGENDS

**Figure 1** Patient flowchart for the Corona São Caetano platform between 13<sup>th</sup> April and 13<sup>th</sup> May 2020. In the upper section (white background) the numbers correspond to individual presentations to the system; among suspected cases 2,073 suspected cases, 60 had two presentations and one had three. In the lower section (grey background) numbers correspond to individual patients making up the final analytic groups.

**Figure 2** Panel A presents prevalence (point) and exact binomial 95% confidence intervals (vertical lines) of symptoms at presentation among patients with suspected COVID-19 according to RT-PCR result and serostatus (A). Panels B and C present the prevalence of presenting symptoms among patients with COVID-19 (RT-PCR and serology positive) stratified by age (B) and sex (C).

**Figure 3** Odds ratios (black dot) and 95% confidence intervals (lines) for testing positive for COVID-19 (RT-PCR positive or serology positive) associated with the presence of each presenting symptom. Horizontal axis is on log scale. Point estimates of odds ratios are shown inline with their corresponding symptom.

1  
2  
3 **Figure 4** Relationship between mean RT-PCR cycle threshold (Ct) and day of illness course  
4 when the nasopharyngeal swab was collected (A), patient age (B), patient sex (C), and  
5 different symptoms at presentation. Panels A and B show the best fit linear regression lines,  
6 panels C and D are violin plots (rotated kernel density plots showing the full distribution of  
7 data) of the Ct values with median (black dot) and interquartile range (black line).  
8  
9  
10  
11  
12  
13  
14  
15  
16  
17  
18  
19  
20  
21  
22  
23  
24  
25  
26  
27  
28  
29  
30  
31  
32  
33  
34  
35  
36  
37  
38  
39  
40  
41  
42  
43  
44  
45  
46  
47  
48  
49  
50  
51  
52  
53  
54  
55  
56  
57  
58  
59  
60

For peer review only

**Table 1**

|                                                                                | <b>RT-PCR +ve<br/>(G1)</b><br>N = 444<br>n (%) or median (IQR) | <b>RT-PCR -ve<br/>Sero +ve (G2)</b><br>N=52<br>n (%) or median (IQR) | <b>RT-PCR -ve<br/>Sero -ve (G3)</b><br>N = 552<br>n (%) or median (IQR) | <b>p-value<br/>G1 versus G2</b> | <b>p-value<br/>G1 versus G3</b> |
|--------------------------------------------------------------------------------|----------------------------------------------------------------|----------------------------------------------------------------------|-------------------------------------------------------------------------|---------------------------------|---------------------------------|
| <b>Sex</b>                                                                     |                                                                |                                                                      |                                                                         |                                 |                                 |
| Male                                                                           | 200 (45.0)                                                     | 23 (44.2)                                                            | 185 (33.5)                                                              | 1.0                             | <0.001                          |
| Female                                                                         | 244 (55.0)                                                     | 29 (55.8)                                                            | 367 (66.5)                                                              |                                 |                                 |
| <b>Age groups (years)</b>                                                      |                                                                |                                                                      |                                                                         | 0.07                            | 0.40                            |
| 10 to 19                                                                       | 29 (6.5)                                                       | 1 (1.9)                                                              | 25 (4.5)                                                                |                                 |                                 |
| 20 to 39                                                                       | 197 (44.4)                                                     | 17 (32.7)                                                            | 236 (42.8)                                                              |                                 |                                 |
| 40 to 59                                                                       | 158 (35.6)                                                     | 28 (53.8)                                                            | 218 (39.5)                                                              |                                 |                                 |
| 60+                                                                            | 60 (13.5)                                                      | 6 (11.5)                                                             | 73 (13.2)                                                               |                                 |                                 |
| <b>Educational level</b>                                                       |                                                                |                                                                      |                                                                         | 0.10                            | <0.001                          |
| Up to primary education                                                        | 75 (16.9)                                                      | 7 (13.5)                                                             | 56 (10.2)                                                               |                                 |                                 |
| High school                                                                    | 214 (48.3)                                                     | 19 (36.5)                                                            | 194 (35.2)                                                              |                                 |                                 |
| University                                                                     | 154 (34.8)                                                     | 26 (50.0)                                                            | 301 (54.6)                                                              |                                 |                                 |
| <b>Essential Occupation</b>                                                    |                                                                |                                                                      |                                                                         | 0.45                            | 0.01                            |
| Non-HCW essential job *                                                        | 137 (30.9)                                                     | 12 (23.1)                                                            | 148 (26.9)                                                              |                                 |                                 |
| Carers                                                                         | 10 (2.3)                                                       | 0 (0.0)                                                              | 8 (1.5)                                                                 |                                 |                                 |
| HCW                                                                            | 32 (7.2)                                                       | 5 (9.6)                                                              | 73 (13.2)                                                               |                                 |                                 |
| No                                                                             | 264 (59.6)                                                     | 35 (67.3)                                                            | 322 (58.4)                                                              |                                 |                                 |
| <b>Body mass index (kg/m<sup>2</sup>)</b>                                      |                                                                |                                                                      |                                                                         | 0.62                            | 0.14                            |
| <25                                                                            | 151 (34.2)                                                     | 22 (42.3)                                                            | 211 (38.4)                                                              |                                 |                                 |
| 25-29                                                                          | 182 (41.2)                                                     | 17 (32.7)                                                            | 187 (34.0)                                                              |                                 |                                 |
| 30-35                                                                          | 79 (17.9)                                                      | 9 (17.3)                                                             | 112 (20.4)                                                              |                                 |                                 |
| 35+                                                                            | 30 (6.8)                                                       | 4 (7.7)                                                              | 40 (7.3)                                                                |                                 |                                 |
| <b>Comorbidities</b>                                                           |                                                                |                                                                      |                                                                         | 0.89                            | 0.40                            |
| Cardiovascular disease                                                         | 88 (20.4)                                                      | 9 (17.6)                                                             | 129 (24.0)                                                              |                                 |                                 |
| Diabetes mellitus                                                              | 48 (11.1)                                                      | 4 (7.8)                                                              | 39 (7.3)                                                                |                                 |                                 |
| Any chronic resp. disease                                                      | 37 (8.9)                                                       | 9 (18.0)                                                             | 79 (15.3)                                                               |                                 |                                 |
| COPD                                                                           | 24 (5.5)                                                       | 5 (9.8)                                                              | 54 (10.1)                                                               |                                 |                                 |
| Chronic kidney disease                                                         | 1 (<1)                                                         | 0 (0.0)                                                              | 3 (1.0)                                                                 | 1.0                             | 0.83                            |
| <b>Time from symptom<br/>onset to swab collection<br/>(days), median (IQR)</b> | 5.0 (4.0-7.0)                                                  | 6.0 (4.0-8.3)                                                        | 6.0 (4.0-9.0)                                                           | 0.06                            | <0.001                          |

**Table 2**

|                                           | <b>Hospitalized</b><br>n=30<br>n (%) or median (IQR) | <b>Not hospitalized</b><br>n=414<br>n (%) or median (IQR) | <b>p-value</b> |
|-------------------------------------------|------------------------------------------------------|-----------------------------------------------------------|----------------|
| <b>Age (years)</b>                        |                                                      |                                                           |                |
| 10 to 19                                  | 1 (3)                                                | 28 (97)                                                   |                |
| 20 to 39                                  | 6 (3)                                                | 191 (97)                                                  |                |
| 40 to 59                                  | 14 (9)                                               | 144 (91)                                                  |                |
| 60+                                       | 9 (15)                                               | 51 (85)                                                   | 0.006          |
| <b>Sex</b>                                |                                                      |                                                           |                |
| Female                                    | 16 (7)                                               | 228 (93)                                                  |                |
| Male                                      | 14 (7)                                               | 186 (93)                                                  | 0.852          |
| <b>Comorbidities</b>                      |                                                      |                                                           |                |
| Cardiovascular disease                    | 11 (13)                                              | 77 (87)                                                   | 0.001          |
| Diabetes mellitus                         | 8 (17)                                               | 40 (83)                                                   | 0.007          |
| Any chronic resp. disease                 | 2 (5)                                                | 35 (95)                                                   | 1.0            |
| COPD                                      | 1 (5)                                                | 23 (95)                                                   | 1.0            |
| Chronic kidney disease                    | 1 (100)                                              | 0 (0)                                                     | 0.06           |
| <b>Body mass index (Kg/m<sup>2</sup>)</b> |                                                      |                                                           |                |
| <25                                       | 4 (3)                                                | 147 (97)                                                  |                |
| 25-29                                     | 8 (4)                                                | 174 (96)                                                  |                |
| 30-35                                     | 12 (15)                                              | 67 (85)                                                   |                |
| 35+                                       | 6 (20)                                               | 24 (80)                                                   | <0.001         |
| <b>Time to presentation (days)</b>        | 3 (3 to 4)                                           | 4 (3 to 5)                                                | 0.072          |



Figure 1

246x181mm (300 x 300 DPI)

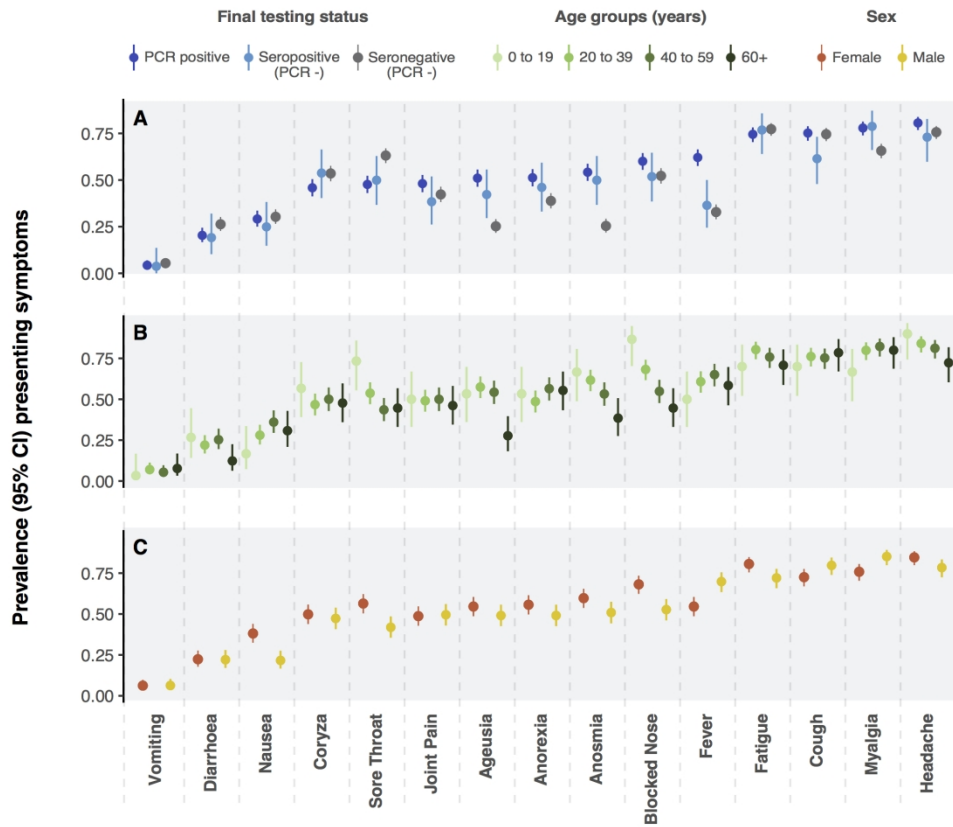

Figure 2

187x158mm (300 x 300 DPI)



Figure 3

154x100mm (300 x 300 DPI)



Figure 4

327x222mm (300 x 300 DPI)



## Supplemental material

### Contents:

1. Initial risk assessment
2. Screen shots of multimedia platform and the initial questionnaire
3. Supplemental Table S1
4. Supplemental figs S1-S5

#### Initial risk assessment

Patients meeting the definition of a suspected case were called by a medical student (under supervision) to complete a risk assessment. All patients were asked a set of standardized questions:

- Do you feel short of breath?
- Are you breathing quickly or finding it difficult to breath?
- If yes, can you count your respiratory rate over one minute? (respiratory rate >20 breaths/minute was considered tachypnoea)
- Has your fever worsened over the last 3 days or have you had a new fever after 2 days being fever-free?
- Have you felt confused or lethargic?

If the patient answered “yes” to any of these questions they were advised to attend a specialist health service. Among the 132 patients that were triaged to hospital, 76 (58% of 132) had shortness of breath, 76 (58% of 132) reported rapid breathing, 33 (25% of 132) persistent fever and 22 (17% of 132) altered mental status.

1  
2  
3  
4 **Screen shots showing examples of the initial questionnaire completed**  
5  
6  
7

8 1) Welcome page  
9

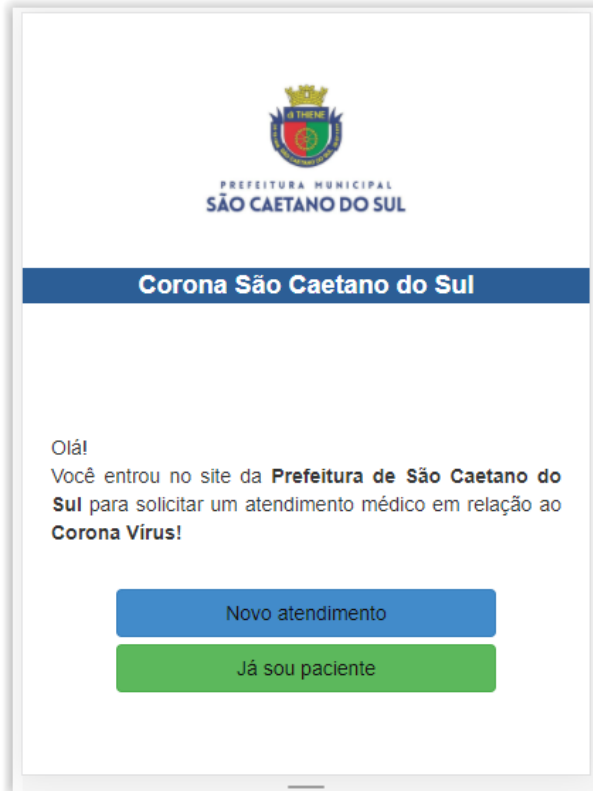

## 2) Zipcode confirmation

1  
2  
3  
4  
5  
6  
7  
8  
9  
10  
11  
12  
13  
14  
15  
16  
17  
18  
19  
20  
21  
22  
23  
24  
25  
26  
27  
28  
29  
30  
31  
32  
33  
34  
35  
36  
37  
38  
39  
40  
41  
42  
43  
44  
45  
46  
47  
48  
49  
50  
51  
52  
53  
54  
55  
56  
57  
58  
59  
60

The screenshot shows a mobile application interface for the Prefeitura Municipal de São Caetano do Sul. At the top, there is the city's coat of arms and the text 'PREFEITURA MUNICIPAL SÃO CAETANO DO SUL'. Below this is a blue banner with the text 'Corona São Caetano do Sul'. The main content area has the heading 'Informe seu CEP' followed by a text input field containing '09581-670'. A green button labeled 'Continuar' is positioned below the input field. At the bottom, there is a copyright notice: 'Copyright © 2020 MRS - Modular Resarch System. Todos os direitos reservados.'

**Corona São Caetano do Sul**

**Informe seu CEP**

09581-670

**Continuar**

Copyright © 2020 MRS - Modular Resarch System.  
Todos os direitos reservados.

3) Patient basic information

The screenshot shows a web form for 'Corona São Caetano do Sul'. At the top is the logo of the Prefeitura Municipal São Caetano do Sul. Below the logo is a blue header with the text 'Corona São Caetano do Sul'. Underneath the header, there is a red instruction: 'Preencha as informações abaixo'. The form contains four input fields: 'Nome' (with a search icon), 'Sobrenome', 'Celular com DDD', and 'Sexo:' (a dropdown menu with '- selecionar -' selected).

view only

## 4) Access code confirmation

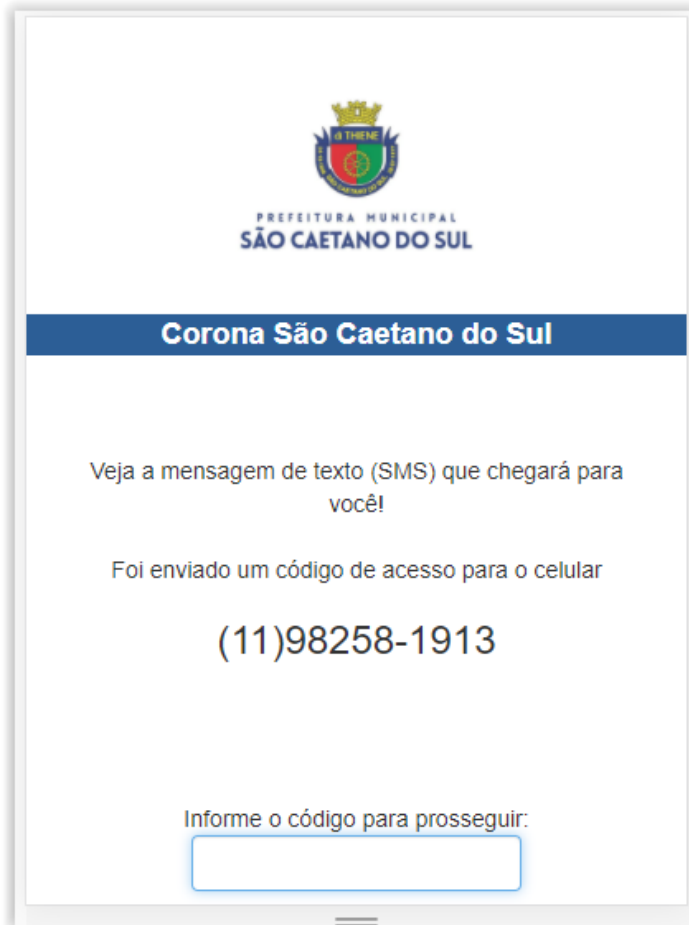

## 5) Questionnaire

Perguntas obrigatórias, favor responder:

**Dados demográficos**

**Se do sexo feminino, está grávida?**

Não

Sim

Não se aplica

**A partir do dia 1º de Março você atuou em alguma destas áreas:**

Não

Profissional da saúde

Áreas essenciais (segurança, bombeiro, farmácia, supermercado, transporte público)

Cuidador (a)

**Dados clínicos**

**Teve febre?**

Não

Sim

**Se sim, você mediu a febre?**

Não

Sim

**Se sim, qual foi a temperatura mais alta?**

**Você tem tosse?**

Não

Sim

## 6) Orientation page

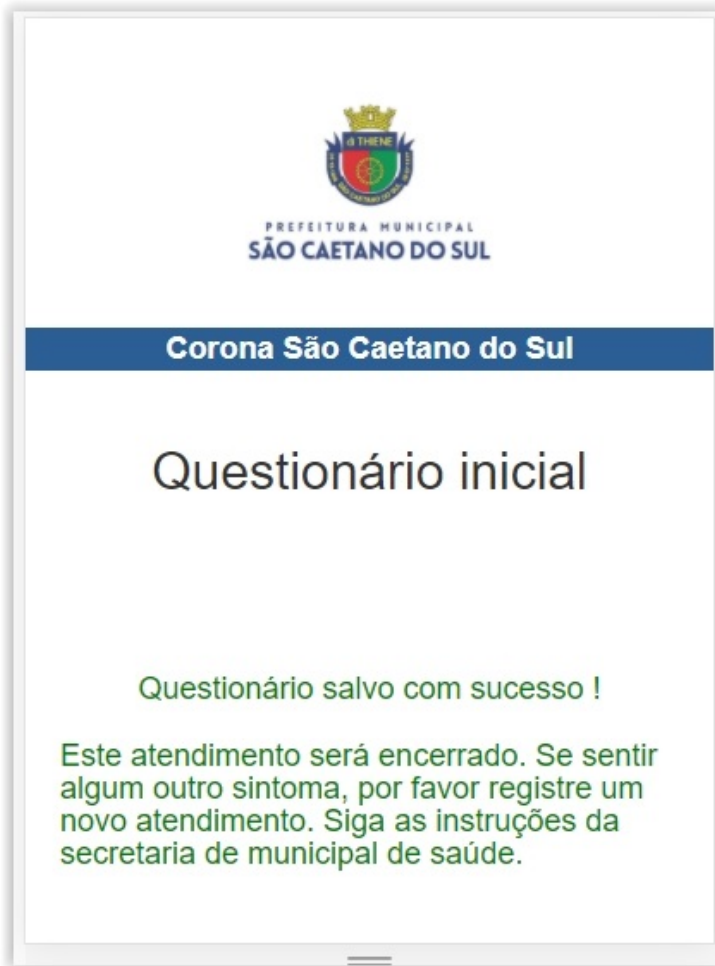

**Table S1 Univariable and adjusted associations between RT-PCR cycle thresholds and patient characteristics**

|                                                                      | Unadjusted analysis        |                         | Adjusted analysis *        |                         |
|----------------------------------------------------------------------|----------------------------|-------------------------|----------------------------|-------------------------|
|                                                                      | Beta (difference in means) | 95% Confidence interval | Beta (difference in means) | 95% Confidence interval |
| Age (years)                                                          | <b>-0.05</b>               | <b>-0.09 to -0.01</b>   | <b>-0.06</b>               | <b>-0.09 to -0.03</b>   |
| Male sex                                                             | <b>-1.36</b>               | <b>-2.49 to -0.23</b>   | -1.05                      | -2.09 to <0.001         |
| Days from symptom onset to swab collection (days, log <sub>2</sub> ) | <b>3.28</b>                | <b>2.33 to 4.03</b>     | <b>3.27</b>                | <b>0.42 to 7.70</b>     |
| PCR platform (ALTONA as reference)                                   | <b>-1.19</b>               | <b>-2.37 to -0.02</b>   | <b>-1.53</b>               | <b>-2.6 to -0.45</b>    |
| <b>Symptoms at presentation</b>                                      |                            |                         |                            |                         |
| Fever                                                                | <b>-1.78</b>               | <b>-2.96 to -0.59</b>   | <b>-1.11</b>               | <b>-2.11 to -0.001</b>  |
| Myalgia                                                              | -1.31                      | -2.75 to 0.12           | -0.78                      | -2.11 to 0.53           |
| Arthralgia                                                           | <b>-1.64</b>               | <b>-2.77 to -0.52</b>   | <b>-1.24</b>               | <b>-2.18 to -0.10</b>   |
| Anosmia                                                              | <b>3.15</b>                | <b>2.04 to 4.25</b>     | <b>2.21</b>                | <b>1.0 to 3.29</b>      |
| Agusia                                                               | <b>2.99</b>                | <b>1.89 to 4.09</b>     | <b>1.96</b>                | <b>0.88 to 3.0</b>      |
| Diarrhea                                                             | <b>2.19</b>                | <b>0.84 to 3.53</b>     | <b>1.36</b>                | <b>0.12 to 2.61</b>     |
| Nausea                                                               | <b>1.50</b>                | <b>0.28 to 2.72</b>     | 1.09                       | -0.04 to 2.24           |
| Vomiting                                                             | <b>2.99</b>                | <b>0.52 to 5.46</b>     | 2.02                       | -0.28 to 4.33           |
| Anorexia                                                             | 0.56                       | -0.57 to 1.70           | 0.47                       | -0.58 to 1.51           |
| Headache                                                             | -0.58                      | -2.12 to 0.97           | -0.81                      | -2.25 to 0.63           |
| Fatigue                                                              | 0.84                       | -0.50 to 2.18           | 0.34                       | -0.91 to 1.59           |
| Coryza                                                               | -0.78                      | -1.92 to 0.34           | -0.68                      | -1.72 to 0.34           |
| Blocked nose                                                         | -0.36                      | -1.53 to 0.81           | <b>-1.48</b>               | <b>-2.59 to -0.37</b>   |
| Cough                                                                | -1.33                      | -2.70 to 0.03           | <b>-1.60</b>               | <b>-2.86 to -0.33</b>   |
| Sore throat                                                          | -0.49                      | -1.62 to 0.64           | -0.45                      | -1.52 to 0.61           |

\* All variables adjusted for age (continuous in years), sex (female as reference group), PCR platform (ALTONA platform as the reference group) and time between symptom onset and swab collection (log base 2). Analysis was performed within a linear regression framework. Positive beta coefficients indicate higher cycle thresholds (lower viral load) associated with that variable, whereas negative beta coefficients indicate lower cycle thresholds when the variable is present. Results in bold reached statistical significance.



Supplemental figures

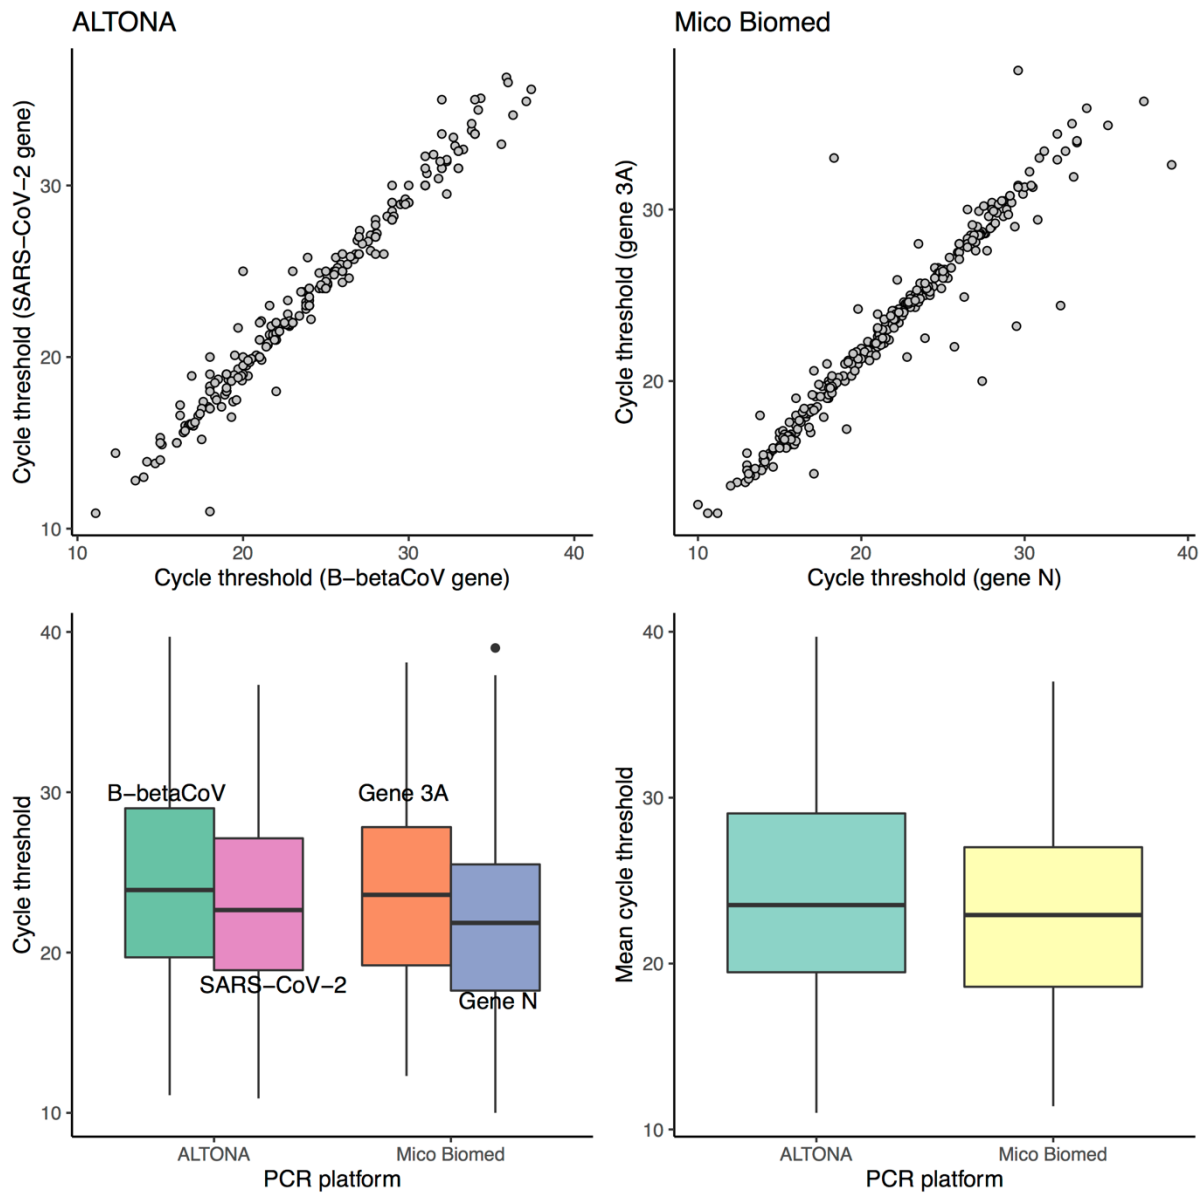

**Figure S1** Comparison of cycle thresholds across PCR platforms and genes amplified. Upper two panels show the concordance between cycle thresholds for the two separate genes amplified by the ALTONA (left) and Mico Biomed (right) kits. Lower left panel – distribution of cycle thresholds by gene amplified and RT-PCR platform used. Lower right-hand panel – distribution of the mean cycle threshold (mean of cycle thresholds for separate genes) between different RT-PCR platforms.

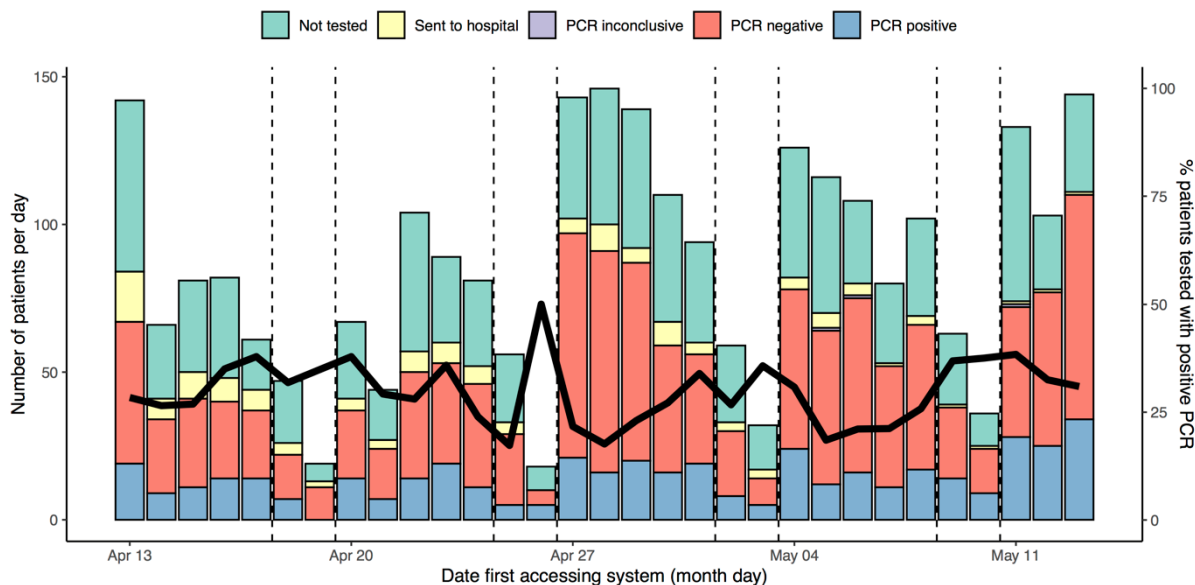

**Figure S2** Time series of presentations to the Corona São Caetano platform. Dashed vertical lines denote the weekends with a reduced number of presentations. Thick black line corresponds to the right-hand y-axis: proportion of RT-PCRs performed with positive result.

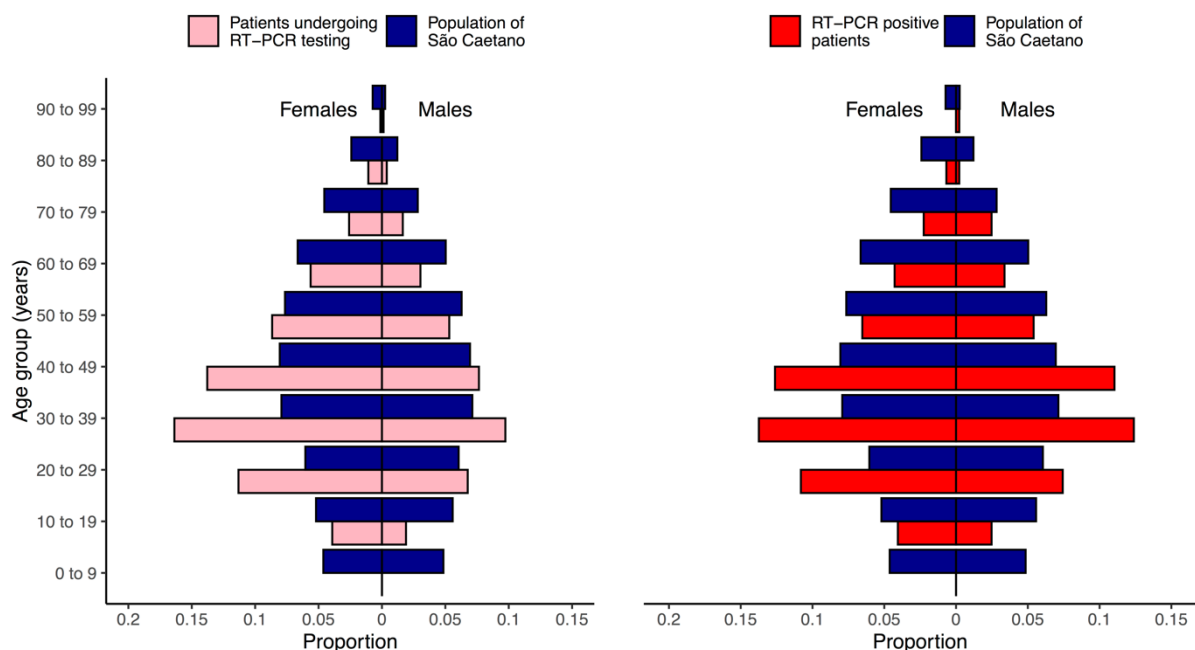

**Figure S3** Age-sex distribution the city of São Caetano do Sul compared with that of patients accessing the Corona São Caetano system and being tested with RT-PCR (left-hand panel) and those testing positive for SARS-CoV-2 (right-hand panel).

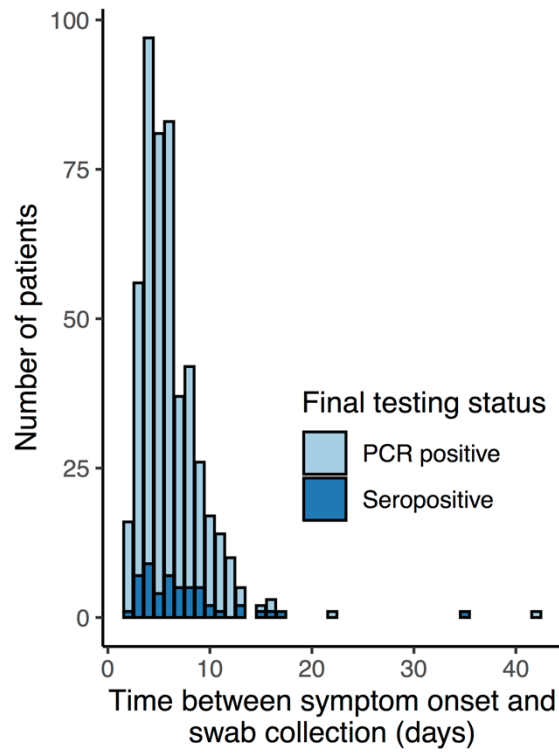

**Figure S4** Histogram of delay between symptom onset and swab collection among patients with COVID-19.

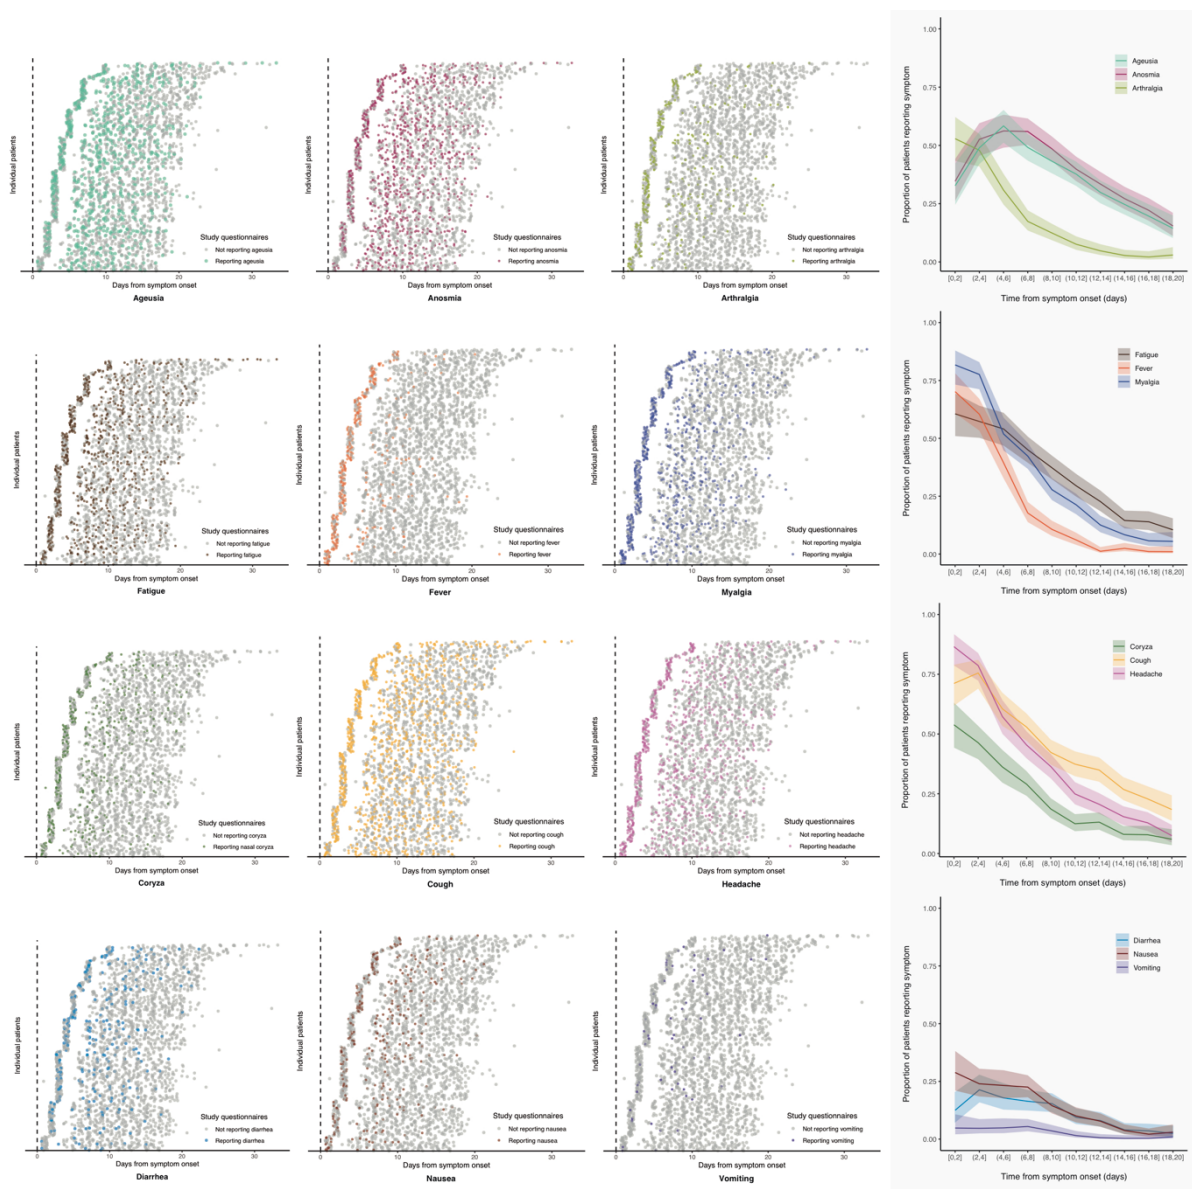

**Figure S5** Left hand figures show symptoms at each follow-up questionnaire among patients testing RT-PCR positive and undergoing follow-up. Individual patients are stacked on the y-axis ordered according to the delay from symptom onset to presentation. Each point represents the response to a questionnaire and its position on the horizontal axis the time after symptom onset that the questionnaire was filled in. Grey points are questionnaires where the patient denied the presence of a given symptom. The coloured points correspond to questionnaires in which the patient reported a given symptom. The right-hand figures results from grouping the horizontal axis time into two-day windows and calculating the proportion of completed questionnaires in which each symptom was reported. The denominators for the horizontal axis groups (number of questionnaires completed within a given time window from symptom onset) are 104 at [0-2] days, 192 at (2-4], 185 at (4-6], 293 at (6-8], 338 at (8-10], 329 at (10-12], 335 at (12-14], 324 at (14-16], 280 at (16-18] and 201 at (18-20].

STROBE Statement—Checklist of items that should be included in reports of *cohort studies*

|                              | Item No | Recommendation                                                                                                                                                                                                                                                                                                         | Page No                                                                     |
|------------------------------|---------|------------------------------------------------------------------------------------------------------------------------------------------------------------------------------------------------------------------------------------------------------------------------------------------------------------------------|-----------------------------------------------------------------------------|
| <b>Title and abstract</b>    | 1       | (a) Indicate the study's design with a commonly used term in the title or the abstract<br>(b) Provide in the abstract an informative and balanced summary of what was done and what was found                                                                                                                          | 1 and 2                                                                     |
| <b>Introduction</b>          |         |                                                                                                                                                                                                                                                                                                                        |                                                                             |
| Background/rationale         | 2       | Explain the scientific background and rationale for the investigation being reported                                                                                                                                                                                                                                   | 4                                                                           |
| Objectives                   | 3       | State specific objectives, including any prespecified hypotheses                                                                                                                                                                                                                                                       | 4                                                                           |
| <b>Methods</b>               |         |                                                                                                                                                                                                                                                                                                                        |                                                                             |
| Study design                 | 4       | Present key elements of study design early in the paper                                                                                                                                                                                                                                                                | 5 to 7                                                                      |
| Setting                      | 5       | Describe the setting, locations, and relevant dates, including periods of recruitment, exposure, follow-up, and data collection                                                                                                                                                                                        | 5 to 6                                                                      |
| Participants                 | 6       | (a) Give the eligibility criteria, and the sources and methods of selection of participants. Describe methods of follow-up<br>(b) For matched studies, give matching criteria and number of exposed and unexposed                                                                                                      | A – 5<br>B - NA                                                             |
| Variables                    | 7       | Clearly define all outcomes, exposures, predictors, potential confounders, and effect modifiers. Give diagnostic criteria, if applicable                                                                                                                                                                               | 7 to 8                                                                      |
| Data sources/<br>measurement | 8*      | For each variable of interest, give sources of data and details of methods of assessment (measurement). Describe comparability of assessment methods if there is more than one group                                                                                                                                   | 5 to 7                                                                      |
| Bias                         | 9       | Describe any efforts to address potential sources of bias                                                                                                                                                                                                                                                              | 7 to 8                                                                      |
| Study size                   | 10      | Explain how the study size was arrived at                                                                                                                                                                                                                                                                              | 8                                                                           |
| Quantitative variables       | 11      | Explain how quantitative variables were handled in the analyses. If applicable, describe which groupings were chosen and why                                                                                                                                                                                           |                                                                             |
| Statistical methods          | 12      | (a) Describe all statistical methods, including those used to control for confounding<br>(b) Describe any methods used to examine subgroups and interactions<br>(c) Explain how missing data were addressed<br>(d) If applicable, explain how loss to follow-up was addressed<br>(e) Describe any sensitivity analyses | A – 7 to 8<br>B – NA<br>C – 8<br>D – NA<br>E – NA                           |
| <b>Results</b>               |         |                                                                                                                                                                                                                                                                                                                        |                                                                             |
| Participants                 | 13*     | (a) Report numbers of individuals at each stage of study—eg numbers potentially eligible, examined for eligibility, confirmed eligible, included in the study, completing follow-up, and analysed<br>(b) Give reasons for non-participation at each stage<br>(c) Consider use of a flow diagram                        | Figure 1<br>and page<br>9                                                   |
| Descriptive data             | 14*     | (a) Give characteristics of study participants (eg demographic, clinical, social) and information on exposures and potential confounders<br>(b) Indicate number of participants with missing data for each variable of interest                                                                                        | A – table<br>1 and<br>pages<br>9to10<br><br>B - Table<br>1 and 2<br>legends |

|                          |     |                                                                                                                                                                                                                                                                                                                                                                                                               |                                     |
|--------------------------|-----|---------------------------------------------------------------------------------------------------------------------------------------------------------------------------------------------------------------------------------------------------------------------------------------------------------------------------------------------------------------------------------------------------------------|-------------------------------------|
|                          |     | (c) Summarise follow-up time (eg, average and total amount)                                                                                                                                                                                                                                                                                                                                                   | C – page<br>9                       |
| Outcome data             | 15* | Report numbers of outcome events or summary measures over time                                                                                                                                                                                                                                                                                                                                                | 11                                  |
| Main results             | 16  | (a) Give unadjusted estimates and, if applicable, confounder-adjusted estimates and their precision (eg, 95% confidence interval). Make clear which confounders were adjusted for and why they were included<br>(b) Report category boundaries when continuous variables were categorized<br>(c) If relevant, consider translating estimates of relative risk into absolute risk for a meaningful time period | Page 7<br>and<br>results<br>section |
| Other analyses           | 17  | Report other analyses done—eg analyses of subgroups and interactions, and sensitivity analyses                                                                                                                                                                                                                                                                                                                | NA                                  |
| <b>Discussion</b>        |     |                                                                                                                                                                                                                                                                                                                                                                                                               |                                     |
| Key results              | 18  | Summarise key results with reference to study objectives                                                                                                                                                                                                                                                                                                                                                      | 12                                  |
| Limitations              | 19  | Discuss limitations of the study, taking into account sources of potential bias or imprecision. Discuss both direction and magnitude of any potential bias                                                                                                                                                                                                                                                    | 13                                  |
| Interpretation           | 20  | Give a cautious overall interpretation of results considering objectives, limitations, multiplicity of analyses, results from similar studies, and other relevant evidence                                                                                                                                                                                                                                    | 13                                  |
| Generalisability         | 21  | Discuss the generalisability (external validity) of the study results                                                                                                                                                                                                                                                                                                                                         | 13                                  |
| <b>Other information</b> |     |                                                                                                                                                                                                                                                                                                                                                                                                               |                                     |
| Funding                  | 22  | Give the source of funding and the role of the funders for the present study and, if applicable, for the original study on which the present article is based                                                                                                                                                                                                                                                 | 14                                  |

\*Give information separately for exposed and unexposed groups.

**Note:** An Explanation and Elaboration article discusses each checklist item and gives methodological background and published examples of transparent reporting. The STROBE checklist is best used in conjunction with this article (freely available on the Web sites of PLoS Medicine at <http://www.plosmedicine.org/>, Annals of Internal Medicine at <http://www.annals.org/>, and Epidemiology at <http://www.epidem.com/>). Information on the STROBE Initiative is available at <http://www.strobe-statement.org>.

# BMJ Open

## Clinical features and natural history of the first 2,073 suspected COVID-19 cases in the Corona São Caetano primary care programme: a prospective cohort study

|                                 |                                                                                                                                                                                                                                                                                                                                                                                                                                                                                                                                                                                                                                                                                                                                                                                                                                                                                                                                                                                                                                                                                                                                                                                                                                                                                                                                                                                                                                                                                                                                                                                                                                                                                                                                                                                                                                                                                                                                                                                                   |
|---------------------------------|---------------------------------------------------------------------------------------------------------------------------------------------------------------------------------------------------------------------------------------------------------------------------------------------------------------------------------------------------------------------------------------------------------------------------------------------------------------------------------------------------------------------------------------------------------------------------------------------------------------------------------------------------------------------------------------------------------------------------------------------------------------------------------------------------------------------------------------------------------------------------------------------------------------------------------------------------------------------------------------------------------------------------------------------------------------------------------------------------------------------------------------------------------------------------------------------------------------------------------------------------------------------------------------------------------------------------------------------------------------------------------------------------------------------------------------------------------------------------------------------------------------------------------------------------------------------------------------------------------------------------------------------------------------------------------------------------------------------------------------------------------------------------------------------------------------------------------------------------------------------------------------------------------------------------------------------------------------------------------------------------|
| Journal:                        | <i>BMJ Open</i>                                                                                                                                                                                                                                                                                                                                                                                                                                                                                                                                                                                                                                                                                                                                                                                                                                                                                                                                                                                                                                                                                                                                                                                                                                                                                                                                                                                                                                                                                                                                                                                                                                                                                                                                                                                                                                                                                                                                                                                   |
| Manuscript ID                   | bmjopen-2020-042745.R3                                                                                                                                                                                                                                                                                                                                                                                                                                                                                                                                                                                                                                                                                                                                                                                                                                                                                                                                                                                                                                                                                                                                                                                                                                                                                                                                                                                                                                                                                                                                                                                                                                                                                                                                                                                                                                                                                                                                                                            |
| Article Type:                   | Original research                                                                                                                                                                                                                                                                                                                                                                                                                                                                                                                                                                                                                                                                                                                                                                                                                                                                                                                                                                                                                                                                                                                                                                                                                                                                                                                                                                                                                                                                                                                                                                                                                                                                                                                                                                                                                                                                                                                                                                                 |
| Date Submitted by the Author:   | 04-Dec-2020                                                                                                                                                                                                                                                                                                                                                                                                                                                                                                                                                                                                                                                                                                                                                                                                                                                                                                                                                                                                                                                                                                                                                                                                                                                                                                                                                                                                                                                                                                                                                                                                                                                                                                                                                                                                                                                                                                                                                                                       |
| Complete List of Authors:       | <p>Leal, Fabio ; Universidade Municipal de São Caetano do Sul; Instituto Nacional de Cancer</p> <p>Mendes-Correa, Maria; Universidade de São Paulo, Instituto de Medicina Tropical (LIM-52, LIM-46, LIM-49) and Departamento de Moléstias Infecciosas e Parasitarias</p> <p>Buss, Lewis; Universidade de São Paulo, Instituto de Medicina Tropical (LIM-52, LIM-46, LIM-49) and Departamento de Moléstias Infecciosas e Parasitarias</p> <p>Costa, Silvia; Universidade de São Paulo, Instituto de Medicina Tropical (LIM-52, LIM-46, LIM-49) and Departamento de Moléstias Infecciosas e Parasitarias</p> <p>Bizarro, Joao; Universidade Municipal de São Caetano do Sul</p> <p>de Souza, Sonia ; Universidade Municipal de São Caetano do Sul</p> <p>Thomaz, Osorio; Instituto de Pesquisas Tecnológicas</p> <p>Tozetto-Mendoza, Tania; Universidade de São Paulo, Instituto de Medicina Tropical (LIM-52, LIM-46, LIM-49) and Departamento de Moléstias Infecciosas e Parasitarias</p> <p>Villas-Boas, Lucy; Universidade de São Paulo, Instituto de Medicina Tropical (LIM-52, LIM-46, LIM-49) and Departamento de Moléstias Infecciosas e Parasitarias</p> <p>Oliveira, Lea; Universidade de São Paulo, Instituto de Medicina Tropical (LIM-52, LIM-46, LIM-49) and Departamento de Moléstias Infecciosas e Parasitarias</p> <p>Grespan, Regina; Universidade Municipal de São Caetano do Sul</p> <p>Capuani, Ligia; Modular Research System</p> <p>Buccheri, Renata; Universidade de São Paulo, Instituto de Medicina Tropical (LIM-52, LIM-46, LIM-49) and Departamento de Moléstias Infecciosas e Parasitarias</p> <p>Domingues, Helves; Modular Research System</p> <p>Alexander, Neal; London School of Hygiene &amp; Tropical Medicine</p> <p>Mayaud, Philippe; London School of Hygiene &amp; Tropical Medicine</p> <p>Sabino, Ester; Universidade de São Paulo, Instituto de Medicina Tropical (LIM-52, LIM-46, LIM-49) and Departamento de Moléstias Infecciosas e Parasitarias</p> |
| <b>Primary Subject Heading</b>: | Infectious diseases                                                                                                                                                                                                                                                                                                                                                                                                                                                                                                                                                                                                                                                                                                                                                                                                                                                                                                                                                                                                                                                                                                                                                                                                                                                                                                                                                                                                                                                                                                                                                                                                                                                                                                                                                                                                                                                                                                                                                                               |
| Secondary Subject Heading:      | Epidemiology, Public health, Global health                                                                                                                                                                                                                                                                                                                                                                                                                                                                                                                                                                                                                                                                                                                                                                                                                                                                                                                                                                                                                                                                                                                                                                                                                                                                                                                                                                                                                                                                                                                                                                                                                                                                                                                                                                                                                                                                                                                                                        |

1  
2  
3  
4  
5  
6  
7  
8  
9  
10  
11  
12  
13  
14  
15  
16  
17  
18  
19  
20  
21  
22  
23  
24  
25  
26  
27  
28  
29  
30  
31  
32  
33  
34  
35  
36  
37  
38  
39  
40  
41  
42  
43  
44  
45  
46  
47  
48  
49  
50  
51  
52  
53  
54  
55  
56  
57  
58  
59  
60

|           |                                                                                    |
|-----------|------------------------------------------------------------------------------------|
| Keywords: | PRIMARY CARE, Epidemiology < TROPICAL MEDICINE, INFECTIOUS DISEASES, PUBLIC HEALTH |
|           |                                                                                    |

SCHOLARONE™  
Manuscripts





I, the Submitting Author has the right to grant and does grant on behalf of all authors of the Work (as defined in the below author licence), an exclusive licence and/or a non-exclusive licence for contributions from authors who are: i) UK Crown employees; ii) where BMJ has agreed a CC-BY licence shall apply, and/or iii) in accordance with the terms applicable for US Federal Government officers or employees acting as part of their official duties; on a worldwide, perpetual, irrevocable, royalty-free basis to BMJ Publishing Group Ltd ("BMJ") its licensees and where the relevant Journal is co-owned by BMJ to the co-owners of the Journal, to publish the Work in this journal and any other BMJ products and to exploit all rights, as set out in our [licence](#).

The Submitting Author accepts and understands that any supply made under these terms is made by BMJ to the Submitting Author unless you are acting as an employee on behalf of your employer or a postgraduate student of an affiliated institution which is paying any applicable article publishing charge ("APC") for Open Access articles. Where the Submitting Author wishes to make the Work available on an Open Access basis (and intends to pay the relevant APC), the terms of reuse of such Open Access shall be governed by a Creative Commons licence – details of these licences and which [Creative Commons](#) licence will apply to this Work are set out in our licence referred to above.

Other than as permitted in any relevant BMJ Author's Self Archiving Policies, I confirm this Work has not been accepted for publication elsewhere, is not being considered for publication elsewhere and does not duplicate material already published. I confirm all authors consent to publication of this Work and authorise the granting of this licence.

1  
2  
3 **Clinical features and natural history of the first 2,073 suspected COVID-19 cases in the**  
4 **Corona São Caetano primary care programme: a prospective cohort study**  
5  
6  
7

8 Fabio E Leal<sup>1,2\*</sup> (PhD), Maria C Mendes-Correa<sup>3\*</sup> (PhD), Lewis F Buss<sup>3\*#</sup> (MBBS), Silvia  
9 F Costa<sup>3</sup> (PhD), Joao CS Bizario<sup>1</sup> (PhD), Sonia RP de Souza<sup>1</sup> (PhD), Osorio Thomaz<sup>4</sup> (PhD),  
10 Tania R Tozetto-Mendoza<sup>1</sup> (PhD), Lucy S Villas-Boas<sup>3</sup>, Lea CO Silva<sup>3</sup> (PhD), Regina MZ  
11 Grespan (MD)<sup>1</sup>, Ligia Capuani<sup>5</sup> (PhD), Renata Buccheri<sup>3</sup> (MD), Helves Domingues (PhD)<sup>5</sup>,  
12 Neal DE Alexander<sup>6</sup> (PhD), Philippe Mayaud<sup>6</sup> (MD), Ester C Sabino<sup>3</sup> (PhD)  
13  
14  
15  
16  
17

18 \* These authors contributed equally  
19  
20  
21

22 **Affiliations**  
23

- 24 1. Universidade Municipal de São Caetano do Sul (USCS), Rua Santo Antonio, São  
25 Caetano do Sul, Brazil
- 26 2. National Cancer Institute (INCA), Praça Cruz Vermelha, Rio de Janeiro, Brazil
- 27 3. Instituto de Medicina Tropical (LIM-52, LIM-46, LIM-49) and Departamento de  
28 Moléstias Infecciosas e Parasitárias da Faculdade de Medicina da Universidade de São  
29 Paulo Avenida Dr. Enéas Carvalho de Aguiar, São Paulo, Brazil
- 30 4. Instituto de Pesquisas Tecnológicas do Estado de São Paulo - IPT
- 31 5. Modular Research System, Avenida Paulista, São Paulo, Brazil
- 32 6. London School of Hygiene and Tropical Medicine (LSHTM), Keppel Street, London,  
33 United Kingdom  
34  
35  
36  
37  
38  
39  
40  
41  
42

43 **Corresponding author:**

44 # Dr Lewis F Buss

45 Instituto de Medicina Tropical da Faculdade de Medicina da Universidade de São Paulo

46 [lewisbuss@usp.br](mailto:lewisbuss@usp.br)  
47  
48  
49  
50  
51  
52

53 KEY WORDS: SARS-CoV-2, COVID-19, pandemic, community, primary care, Brazil  
54  
55  
56  
57  
58  
59  
60

## ABSTRACT

**Background:** Despite most cases not requiring hospital care, there are limited community-based clinical data on COVID-19.

**Methods:** The Corona São Caetano program is a primary care initiative providing care to all residents with COVID-19 in São Caetano do Sul, Brazil. It was designed to capture standardised clinical data on community COVID-19 cases. After triage of potentially severe cases, consecutive patients presenting to a multimedia screening platform between 13th April and 13th May 2020 were tested at home with SARS-CoV-2 reverse transcriptase (RT) PCR; positive patients were followed up for 14 days with phone calls every 2 days. RT-PCR-negative patients were offered additional SARS-CoV-2 serology testing to establish their infection status. We describe the clinical, virologic and natural history features of this prospective population-based cohort.

**Findings:** Of 2,073 suspected COVID-19 cases, 1,583 (76.4%) were tested by RT-PCR, of whom 444 (28.0%, 95%CI: 25.9-30.3) were positive; 604/1,136 (53%) RT-PCR-negative patients underwent serology, of whom 52 (8.6%) tested SARS-CoV-2 seropositive. The most common symptoms of confirmed COVID-19 were cough, fatigue, myalgia and headache; whereas self-reported fever (OR 3.0, 95%CI: 2.4-3.9), anosmia (OR 3.3, 95%CI: 2.6-4.4), and ageusia (2.9, 95%CI: 2.3-3.8) were most strongly associated with a positive COVID-19 diagnosis by RT-PCR or serology. RT-PCR cycle thresholds were lower in men, older patients, those with fever and arthralgia, and closer to symptom onset. The rates of hospitalization and death among 444 RT-PCR-positive cases were 6.7% and 0.7%, respectively, with older age and obesity more frequent in the hospitalized group.

**Conclusion:** COVID-19 presents in a similar way to other mild community-acquired respiratory diseases, but the presence of fever, anosmia, and ageusia can assist the specific diagnosis. Most patients recovered without requiring hospitalization with a low fatality rate compared to other hospital-based studies.

### Strengths and limitations of this study

1. The clinical features of COVID-19 have mostly been described in hospital-based studies which are biased towards severe disease
2. We report a prospective cohort of suspected and confirmed COVID-19 cases from a primary care initiative in the Brazilian municipality of São Caetano do Sul
3. By systematically testing consecutive suspected community cases with molecular and serological tests we were able to address the diagnostic value of clinical features of mild-moderate COVID-19 in primary care
4. Prospective follow-up of confirmed cases and linkage with hospital datasets allowed us to describe the natural history of a primary care COVID-19 population
5. A limitation of the work was that not all PCR-negative participants underwent serology testing due to loss to follow-up

## INTRODUCTION

A comprehensive public health response is vital but difficult to achieve during an epidemic. The COVID-19 pandemic, caused by the novel severe acute respiratory syndrome coronavirus 2 (SARS-CoV-2), started in China in late 2019.<sup>1</sup> According to the World Health Organization (WHO)<sup>2,3</sup> and others<sup>4,5</sup>, the ideal early response should have been multipronged, with identification, isolation, treatment and contact tracing of symptomatic cases, relying on a strong testing programme. Primary health care is well placed to implement such a response, by identifying cases early and managing them in a way that minimizes overcrowding of emergency rooms and intensive care units.<sup>6,7</sup> Real-time data analysis coming from these primary care response systems can inform policy decisions.

Primary health care (PHC) in Brazil is provided by the publicly funded Unified Health System (SUS – Portuguese acronym) within the family health strategy (*Estratégia Saúde da Família*). Provision of care is centred around a healthcare unit with a multi-professional team that is responsible for all residents in the immediate catchment area<sup>8</sup>. Nearly two-thirds of the Brazilian population is covered by the family health strategy<sup>8</sup>.

In Brazil, the first case of COVID-19 was identified in the city of São Paulo on 26<sup>th</sup> February 2020.<sup>9</sup> As of 1<sup>st</sup> Dec 2020 there were over 6 million confirmed cases nationally, with São Paulo contributing a fifth of these.<sup>10</sup> The reasons for the exceptionally large epidemic in Brazil have been discussed elsewhere<sup>11–13</sup>. In March 2020, the Municipal Health Department of the municipality of São Caetano do Sul – part of the Greater Metropolitan Region of São Paulo – began to develop a clinical and testing platform to organize its COVID-19 response. The aim was to provide universal detection and management of symptomatic cases and their contacts. The platform was developed in partnership with two local universities – the Municipal University of São Caetano do Sul (USCS) and the University of São Paulo (USP) – and called “Corona São Caetano”.

Large scale community-based observational cohorts are difficult to establish under epidemic circumstances, particularly if the risk of exposure for research personnel is high. Hence, most COVID-19 epidemiological and clinical studies have been hospital-based,<sup>14–16</sup> and therefore tend to include more severe cases whose findings may not be generalizable to the general

1  
2  
3  
4 population<sup>17</sup>, although some limited descriptions from ambulatory settings are available<sup>18–20</sup>.

5  
6 The objectives of this study were to describe the epidemiological indicators of the early phase  
7 of the programme rollout; and to describe the clinical, virological and natural history features  
8 (including hospitalization and deaths) of SARS-CoV-2 infection among patients identified in  
9 primary care.  
10  
11  
12

## 13 14 **METHODS**

### 15 16 17 **Setting**

18  
19  
20  
21 The municipality of São Caetano do Sul has a population of 161,000 inhabitants.<sup>21</sup> The city's  
22 population is older than the Brazilian population<sup>21</sup> and its Human Development Index is one  
23 of the highest in the country. Nearly all (97.4%) children aged 6-14 are in education and 31%  
24 of the population have completed higher education<sup>22</sup> (Brazilian national average is 11%).  
25  
26  
27  
28  
29

### 30 31 **Corona São Caetano platform**

32  
33 The objective of the platform was to offer clinical care for patients with flu syndrome and  
34 suspected COVID-19. Through the multimedia platform (website or phone call), patients  
35 could be triaged and guided in relation to their clinical needs and tested, without having to  
36 leave their homes or go to health facilities, unless seriously ill. This strategy aimed at  
37 reducing the workload in health units and the risk of SARS-CoV-2 transmission in the  
38 population served by these health units. Patients' GPs were informed of lab results and had  
39 access to clinical data stored in the platform. GPs were expected to call patients being  
40 assisted by the platform and provide medical assistance through home visits or at the primary  
41 care clinic if needed. In general, the drugs prescribed through the platform were restricted to  
42 analgesics and antipyretics. The platform was designed so that clinical information was  
43 collected in a standardized way for research purposes.  
44  
45  
46  
47  
48  
49  
50  
51  
52

53  
54 Residents of the municipality aged 12 years and older with suspected COVID-19 symptoms  
55 were encouraged, through local media reports, to contact the dedicated Corona São Caetano  
56 platform via the website or by phone. They were invited to complete an initial screening  
57  
58  
59  
60

1  
2  
3 questionnaire that included socio-demographic data; information on symptoms type, onset  
4 and duration; and recent contacts.  
5  
6  
7

8 Patients meeting the suspected COVID-19 case definition (i.e., having at least two of the  
9 following symptoms: fever, cough, sore throat, coryza, or change in/loss of smell (anosmia);  
10 or one of these symptoms plus at least two other symptoms consistent with COVID-19) were  
11 further evaluated, whilst people not meeting these criteria were reassured, advised to stay at  
12 home and contact the service again if they were to develop new symptoms or worsening of  
13 current ones. The case definition was developed in consultation with infectious disease and  
14 primary care specialists to encompass the known symptoms of COVID-19 and is similar to  
15 the Brazilian national case definition<sup>23</sup>. Patients were then called by a medical student to  
16 complete a risk assessment. All pregnant women, and patients meeting pre-defined triage  
17 criteria for severe disease (see Supplemental Material), were advised to attend a hospital  
18 service - either an emergency department or outpatient service, depending on availability.  
19 All other patients were offered a home visit for self-collection of a nasopharyngeal swab.  
20  
21  
22  
23  
24  
25  
26  
27  
28  
29

### 30 **Sample collection**

31  
32  
33 Patients self-collected nasopharyngeal swabs (NPS – both nostrils and throat) at their own  
34 homes under the supervision of trained healthcare personnel. We sent a link to an  
35 instructional video (<https://youtu.be/rWZzV2ZP7KY>) before the home visit to provide  
36 guidance on self-collection procedures. Nasopharyngeal swabs for the molecular detection of  
37 SARS-CoV-2 has been recommended as an alternative method of collection for samples from  
38 patients with suspected COVID-19<sup>24</sup>, as well as other respiratory diseases, and has the  
39 advantage of reducing the chance of aerosol transmission to healthcare professionals.  
40  
41  
42  
43  
44  
45  
46  
47  
48  
49  
50  
51  
52  
53  
54  
55  
56  
57  
58  
59  
60  
Healthcare personnel were instructed to maintain a distance of six feet from the patient and to  
wear personal protective equipment at all times. Samples were immediately put on a cool box  
between 2-8°C and stored at 4°C in a fridge until shipment to the lab within 24 hours.

### 53 **Follow-up procedures**

54  
55  
56  
57  
58  
59  
60  
Patients testing SARS-CoV-2 RT-PCR positive were followed up to 14 days<sup>25</sup> (a maximum  
of 7 phone calls) from completion of their initial questionnaire. They were contacted every 48  
hours by a medical student who completed another risk assessment and recorded any ongoing

1  
2  
3 or new symptoms. The purpose of the follow-up was to assess clinical evolution. Where  
4 patients were judged to be deteriorating or developing severe disease they were signposted to  
5 secondary care services. Patients testing RT-PCR negative were followed up by the primary  
6 health care program for their residential area. They were advised to contact the platform for a  
7 new consultation if they developed new symptoms. Starting on May 19<sup>th</sup>, when serological  
8 testing became available, RT-PCR-negative patients were re-contacted to offer antibody  
9 (IgG/IgM combined) testing 14 days after their initial registration as long as they had become  
10 asymptomatic.  
11  
12  
13  
14  
15  
16  
17

### 18 **Study dates**

19  
20  
21  
22 The Corona São Caetano programme was launched on 6th April 2020, with a one week pilot  
23 phase designed to test instruments before roll-out. For this analysis, we included all patients  
24 making their first contact with the programme in its first month, ie between 13th April and  
25 13th May 2020. The period of follow-up (last date of data extraction) was 4th June 2020, to  
26 account for the accrual period (three weeks) of possible hospitalizations in the last included  
27 patients.  
28  
29  
30  
31  
32  
33

### 34 **Laboratory methods**

35  
36  
37 Due to shortages of some reagents, we used two RT-PCR platforms at different times during  
38 the study: ALTONA RealStar® SARS-CoV-2 RT-PCR Kit 1.0 (Hamburg, Germany) and the  
39 Mico BioMed RT-qPCR kit (Seongnam, South Korea). For serology we tested 10µL of  
40 serum or plasma (equivalent in performance) using a qualitative rapid chromatographic  
41 immunoassay (Wondfo Biotech Co., Guangzhou, China), that jointly detects anti-SARS-  
42 CoV-2 IgG/IgM. The assay has been found to have a sensitivity of 81.5% and specificity of  
43 99.1% in a US study<sup>26</sup>. In our local validation, after two weeks of symptoms, the sensitivity  
44 in 59 RT-PCR confirmed cases was 94.9%, and specificity in 106 biobank samples from  
45 2019 was 100%.  
46  
47  
48  
49  
50  
51  
52  
53

### 54 **Statistical methods**

55  
56  
57 We estimated the contribution of our platform to total number of COVID-19 cases diagnosed  
58 in São Caetano do Sul. To do this, we compared the number of cases diagnosed in our  
59  
60



1  
2  
3 programme with official data released by the Municipal Department of Health in its daily  
4 bulletins (accessed here <https://coronavirus.saocaetanodosul.sp.gov.br>).

5  
6  
7  
8 Clinical and demographic data were extracted directly from the Corona São Caetano  
9 information system. To analyse clinical presentation, we first calculated the proportion and  
10 exact binomial 95% confidence intervals (CI) of cases reporting each symptom in the three  
11 testing groups: SARS-CoV-2 RT-PCR positive; RT-PCR negative / seropositive; and RT-  
12 PCR negative / seronegative. We next combined RT-PCR and serology positive cases to  
13 make a confirmed COVID-19 group, and those negative on both tests to make a SARS-CoV-  
14 2 negative control group. We express the association between each symptom and a positive  
15 COVID-19 diagnosis as odds ratios (OR) and 95% CIs.  
16  
17  
18  
19  
20  
21  
22

23  
24 Next, we assessed associations between RT-PCR cycle thresholds (Cts) and other clinical  
25 features. ALTONA and MiCo BioMed RT-PCR kits each separately amplify two different  
26 SARS-CoV-2 viral genes, as such each patient had two Ct values. There was a high  
27 concordance between Cts for the two genes within each kit (Figure S1), and we opted therefore  
28 to use the mean of the two Ct values for each patient in all analyses. We calculated univariable  
29 associations between Cts and age, sex, delay from symptom onset to NPS collection, and  
30 presenting symptoms using simple linear regression. We then built a multivariable linear  
31 regression model to assess independent associations between presenting symptoms and RT-  
32 PCR Cts. As age, sex, and time of swab collection may confound this relationship we included  
33 these variables, as well as the RT-PCR platform (ALTONA vs MiCo BioMed), as covariates  
34 in the model.  
35  
36  
37  
38  
39  
40  
41  
42  
43

44 For RT-PCR positive patients, hospitalizations and deaths were extracted from the study  
45 platform. To extend the follow-up period and to capture RT-PCR negative patients and those  
46 initially triaged to hospital (no study follow-up), hospitalization and vital status was  
47 confirmed by linkage with two administrative databases: the municipal epidemiological  
48 surveillance dataset, as well as the state-wide influenza-like illness notification system  
49 (SIVEP-Gripe). Linkage was last performed on 5<sup>th</sup> June 2020, 23 days after the last patient  
50 was enrolled, by the author SRPS who did not have access to the full analytic dataset. This  
51 author searched the SIVEP-Gripe system and the municipal epidemiological surveillance  
52 dataset using full name and date of birth. Categorical patient characteristics were compared  
53 between patients requiring and those not requiring hospitalization using a Chi-squared or  
54  
55  
56  
57  
58  
59  
60

1  
2  
3 Fisher exact test. Continuous variables were compared using the Wilcoxon rank sum test. A  
4 multivariate analysis was not conducted due to the small number of individuals experiencing  
5 this outcome.  
6  
7  
8  
9

10 The cohort sample included consecutive cases presenting to the Corona São Caetano program  
11 and a formal sample size calculation was not performed. Missing data were excluded. All  
12 analyses were conducted in R Software for Statistical Computing, version 3.6.3.<sup>27</sup>  
13  
14  
15

## 16 17 **Ethics**

18  
19  
20 The study was approved by the local ethics committee (Comissão de Ética para Análise de  
21 Projeto de Pesquisa - CAPPesq, protocol No. 13915, dated June 03, 2020). The committee  
22 waived the need for informed consent and allowed the development of an analytical dataset  
23 with no personal identification for the current analysis.  
24  
25  
26  
27  
28

## 29 **Patient and public involvement**

30  
31  
32 Patients were not involved in the planning of this research.  
33  
34  
35

## 36 **RESULTS**

### 37 38 39 **Epidemiological and programmatic indicators**

40  
41  
42 Over the study period, there were 2,073 presentations (49% phone call, 51% website), from  
43 2,011 individual patients, that met the criteria for a suspected COVID-19 case (See Figure 1  
44 for study flow). At initial phone interview, 132 (6%) potential cases were advised to go  
45 directly to a health service based on the triage questions, and 12 (0.6%) because of  
46 pregnancy. Only four (3%) of referred patients were admitted to hospital and none died.  
47  
48  
49  
50  
51

52  
53 In total 1,583 individual patients were tested with RT-PCR for SARS-CoV-2; 444 (28.0%,  
54 95%CI: 25.9-30.3) were positive. The proportion of positive results was stable over the study  
55 (Figure S2). Among the RT-PCR negative group, 604 (53% of 1,136) underwent serology  
56 testing, of whom 52 (8.6%, 95%CI: 6.6-11.1) were seropositive. The median [IQR] time from  
57 symptom onset to serology collection was 31 [26–37] days. The age-sex structure of patients  
58  
59  
60

1  
2  
3 being tested differed from the underlying population of São Caetano do Sul (Figure S3) with  
4 an overrepresentation of working-age adults and women. At the beginning of programme role  
5 out, 25% of notified COVID-19 cases in São Caetano do Sul were diagnosed in our  
6  
7 programme. Over the study period, adherence to the programme increased, and by May 13<sup>th</sup>,  
8  
9 2020, this figure had risen to 78%.  
10  
11

12  
13 Of 444 RT-PCR positive patients eligible for longitudinal follow-up, 326 (73%) had their  
14 final follow-up visit at least 14 days after their initial presentation. Of the seven possible  
15 follow-up questionnaires, 384 (86%) COVID-19 patients completed three or more, and 162  
16  
17 (36%) completed all seven.  
18  
19

### 20 21 22 **Participant characteristics** 23

24  
25 Patient characteristics are shown in Table 1. Although women were overrepresented in the  
26 cohort, there were proportionally more males in the RT-PCR positive and seropositive groups  
27 compared to the seronegative group. Of note, 55% of RT-PCR negative/seronegative patients  
28 had completed higher education compared to 35% RT-PCR-positive patients ( $p < 0.001$ , Chi-  
29 squared test). The median number of days from symptom onset to swab collection was 5.0  
30 (IQR, 4.0-7.0) among RT-PCR positive patients and 6.0 (IQR, 4.0-8.3) among RT-PCR  
31 negative/seropositive patients ( $p = 0.06$ , Wilcoxon rank sum) (Figure S4). Chronic  
32 respiratory disease was less frequent in RT-PCR positive than dual-negative patients.  
33  
34  
35  
36  
37  
38  
39  
40

### 41 **Symptoms of COVID-19** 42

43  
44 The prevalence of individual symptoms at presentation is shown in Figure 2A stratified by  
45 final diagnostic category. The most frequent symptoms among RT-PCR and seropositive  
46 patients were headache (82% and 75%), myalgia (80% and 80%), cough (77% and 63%), and  
47 fatigue (77% and 79%). Anosmia was present in 56% and 63% of RT-PCR positive and  
48 seropositive patients, respectively, compared to 30% in those testing doubly negative. A  
49 similar pattern was observed for ageusia (53% and 53% versus 30%). Upper respiratory tract  
50 symptoms - including coryza, blocked nose, ageusia, and anosmia - were more frequent in  
51 younger people (Figure 2B). The evolution of symptoms over time among RT-PCR positive  
52 patients is shown in Figure S5.  
53  
54  
55  
56  
57  
58  
59  
60

1  
2  
3 The odds ratios for testing positive for SARS-CoV-2 (RT-PCR or serology) associated with  
4 each presenting symptom are shown in Figure 3. The symptoms with strongest associations  
5 were anosmia (OR 3.3, 95%CI: 2.6-4.4), fever (3.0, 95%CI: 2.4-3.9) and ageusia (2.9,  
6 95%CI: 2.3-3.8). The presence of sore throat (0.53, 95%CI: 0.41-0.68) and diarrhoea (0.72,  
7 95%CI: 0.55-0.96) were associated with a negative SARS-CoV-2 test.  
8  
9  
10  
11  
12

### 13 **Associations between SARS-CoV-2 RT-PCR Cycle threshold (Ct) values, and** 14 **demographic and clinical features** 15 16

17  
18 Figure 4 shows the associations between mean RT-PCR cycle threshold and demographic  
19 features and symptoms at presentation (the median [IQR] time from presentation to swab was  
20 1 [1-2] day). Older age was associated with lower cycle thresholds, with a change in mean Ct  
21 of -0.05 (95%CI -0.09 to -0.01) for each additional year of age. The mean difference in Ct  
22 value was -1.36 (95% CI -2.49 to -0.23) in men compared to women. For each doubling in  
23 the number of days from symptom onset to swab collection the mean Ct value increased by  
24 3.28 (95%CI 2.33 to 4.03). Presenting symptoms of fever and arthralgia were associated with  
25 lower Cts, whereas anosmia, ageusia, vomiting, diarrhoea, and nausea were associated with  
26 higher Cts (Figure 4 and Table S1). After adjustment for age, sex, delay from symptom  
27 onset, and RT-PCR platform used, fever (-0.06, 95%CI: -2.11 to -0.001) and arthralgia (-  
28 1.24, 95%CI: -2.18 to -0.10) remained associated with lower Cts, and anosmia (2.21, 95%CI:  
29 1.0-3.29), ageusia (1.96, 95%CI: 0.88-3.0), and diarrhoea (1.36, 95%CI: 0.12-2.61) with  
30 higher Cts (Table S1).  
31  
32  
33  
34  
35  
36  
37  
38  
39  
40  
41  
42

### 43 **Hospitalizations and deaths** 44 45

46 Of the 444 RT-PCR positive patients, 30 (6.8%) had been hospitalized by 5<sup>th</sup> June 2020,  
47 when the database linkage was last updated, and three (0.7%) had died; in-hospital mortality  
48 was therefore 10% (3/30). In 28 cases the date of admission was available. The median time  
49 from symptom onset to hospital admission was 7 (range 2 to 14) days. Among 1,136 RT-  
50 PCR-negative patients, six (0.5%) had been admitted to hospital. One (<0.01% of 1,136) of  
51 these six patients died. None of the 604 RT-PCR negative patients that underwent serology  
52 were admitted to hospital or died. Table 2 compares patient characteristics by hospitalization  
53 status. Notably, hospitalized patients were older, had more cardiovascular comorbidities and  
54 were more frequently obese.  
55  
56  
57  
58  
59  
60

## DISCUSSION

We present a community-based cohort of suspected COVID-19 cases recruited through a primary care initiative in the Brazilian municipality of São Caetano do Sul. Offering RT-PCR testing to all patients presenting with symptoms compatible with COVID-19, the positivity rate was 28%, with 8.6% of those testing negative subsequently found to be seropositive - i.e. > 35% of the cohort had a diagnosis of COVID-19. Anosmia, ageusia, and self-reported fever provided the greatest diagnostic value in identifying COVID-19. The rate of hospitalization and deaths among RT-PCR positive patients was low, at 6.8% and 0.7%, respectively. Our results provide important information on the clinical presentation, diagnostic testing and natural history of COVID-19 identified in the community.

The profile of suspected cases that tested positive for COVID-19 differed in some important respects from those testing negative. The lower educational level among positive cases suggests that, in São Caetano do Sul, the risk of exposure to COVID-19 follows a socioeconomic gradient, consistent with other findings from Brazil<sup>13,28</sup>. Although more women presented to the platform, proportionally more men tested positive, consistent with data from São Paulo showing a higher seroprevalence in men than women<sup>11</sup>, but also potentially reflecting different health seeking behaviours. Comorbidities were mostly similar, although chronic respiratory disease was less frequent in those testing RT-PCR positive. This may be due to a proportion of presentations in those with chronic respiratory disease being explained by exacerbations of their underlying pathology from aetiologies other than SARS-CoV-2, as well as higher anxiety about COVID-19 in those with pre-existing respiratory disease.

Extrapolating the seropositivity rate among RT-PCR negative patients to the 532 who were not tested with serology, we estimate that an additional 46 seropositive cases would have been identified. As such, 18% (98/542) of COVID-19 cases were missed by RT-PCR in the setting of symptomatic presentations to primary care. This is similar to a pooled analysis showing a false-negative rate for RT-PCR of 20% at three days post-symptom onset.<sup>29</sup> Viral load peaks around the time of symptom onset and remains high over the first symptomatic week (also see Figure 4A).<sup>30,31</sup> Consistent with this, we found a slightly longer delay to swab

1  
2  
3 collection (due to delay in presentation to the platform) in RT-PCR false-negative patients  
4 than RT-PCR positive patients (Figure S4).  
5  
6  
7

8 COVID-19 presents in a similar way to other respiratory viral illnesses. Indeed, in our cohort  
9 the most common symptoms of COVID-19 - such as cough, fatigue, headache, etc. - were  
10 reported with a similar frequency among patients testing negative. It is therefore important to  
11 have identified anosmia, ageusia, self-reported fever, myalgia, and anorexia as the symptoms  
12 with greatest value in the differential diagnosis of COVID-19 in primary care. This is  
13 consistent with systematic review evidence highlighting anosmia and ageusia as key  
14 diagnostic features of COVID-19<sup>32</sup>. It is of note that 30% of jointly RT-PCR and serology  
15 negative patients reported these symptoms, indicating that although indicative of COVID-19,  
16 the specificity of these symptoms is not high enough to rule in the diagnosis alone. Sore  
17 throat and diarrhoea - both considered symptoms of COVID-19 in other settings –<sup>33</sup> were  
18 more frequently due to other possible aetiologies in this primary care context.  
19  
20  
21  
22  
23  
24  
25  
26  
27  
28

29 These results are robust for a number of reasons. Firstly, our sample is representative of the  
30 population of interest - i.e. consecutive patients with suspected COVID-19 in the community  
31 - instead of extrapolating from hospital cases. Symptom data were collected prospectively,  
32 eliminating recall or interviewer bias. Finally, we have a control group of patients who were  
33 negative for both RT-PCR and serology, minimizing misclassification due to false negative  
34 RT-PCR.  
35  
36  
37  
38  
39  
40

41 In our study, the proportion of patients with a positive SARS-CoV-2 RT-PCR requiring  
42 hospitalization was low (7%). Early reports from China were of 13.8% of cases being  
43 severe<sup>34</sup>, but this value was lower when under ascertainment of cases was accounted for.<sup>35,36</sup>  
44 This is because our cohort reflects mild to moderate cases, as severely ill patients are likely to  
45 have attended hospital directly. As such, only 3% of patients we triaged to attend health  
46 services were ultimately hospitalized, possibly due to self-selection of patients presenting to  
47 our service. Supporting this, our overall case fatality ratio among RT-PCR positive patients  
48 was 0.7%. The rate of hospitalization was lower (0.5%) in those testing PCR-negative. These  
49 patients were admitted with a severe acute respiratory syndrome of an aetiology other than  
50 SARS-CoV-2. The 14-fold higher admission rate among PCR-positive cases highlights the  
51 importance of molecular testing for SARS-CoV-2 in patients presenting with features of  
52 respiratory viral illness to primary care.  
53  
54  
55  
56  
57  
58  
59  
60



1  
2  
3  
4  
5 As expected, the main determinant of Ct was the delay between symptom onset and swab  
6 collection, mostly due to the delay in reporting to the platform. After adjusting for this, as  
7 well as age and sex, we found that a self-reported fever and arthralgia were associated with  
8 lower Cts. The presence of these symptoms may identify patients with a higher viral load in  
9 the community. However, these results should be seen as purely exploratory, and the wide  
10 spread of Ct values around the regression line precludes a direct clinical application at  
11 present.  
12  
13  
14  
15  
16  
17

18  
19 Our study has some limitations. Firstly, the small sample size precluded a multivariate analysis  
20 of factors associated with hospitalization or death. Next, serology was not performed on all  
21 RT-PCR negative patients due to on-going symptoms, loss to follow-up, or patient refusal. Of  
22 note, none of the RT-PCR-negative patients that were admitted to hospital underwent  
23 serology testing. This suggests that patients who were not tested with serology may have had  
24 a higher prevalence of COVID-19 than those that were tested. In addition, imperfect serology  
25 test performance (81% sensitivity)<sup>26</sup> will introduced false-negative results. Taken together,  
26 these biases may have underestimated the true seroprevalence among RT-PCR-negative  
27 cases, as well as the false-negative rate of RT-PCR. The latter calculation may also have been  
28 influenced by the inclusion of RT-PCR positive patients in the denominator, introducing an  
29 incorporation bias.<sup>37</sup> Furthermore, the association between symptoms and COVID-19  
30 diagnosis was based on the comparison with doubly PCR and serology negative individuals.  
31 It is not clear how the exclusion of individuals that did not undergo serology testing would  
32 have influenced these associations. Finally, patients were not involved in the planning of the  
33 Corona platform or the research proposal.  
34  
35  
36  
37  
38  
39  
40  
41  
42  
43  
44  
45

46 A key strength to our study relates to the provision of primary healthcare in Brazil and its  
47 symbiosis with medical training nationwide. Primary health care - within the family health  
48 strategy (*Estratégia Saúde da Família*) - is centered around a healthcare unit with a multi-  
49 professional team that is responsible for all residents in the immediate catchment area<sup>8</sup>. São  
50 Caetano do Sul has enough GP units within the family health strategy that all residents have  
51 access to primary care. Medical students from the municipal university (USCS) are integrated  
52 into the primary healthcare teams and progressively trained from the first year of medical  
53 school. Our initiative took advantage of this existing system, with the addition of an online  
54 platform allowing remote clinical assessment and follow-up. The suspension of normal  
55  
56  
57  
58  
59  
60

1  
2  
3 clinical training at the medical school provided the workforce. The partnership with the  
4 University of São Paulo, which provided the laboratory diagnostics, created the unique  
5 opportunity to establish our prospective community cohort of suspected and confirmed  
6 COVID-19 cases. But we believe that this infrastructure could be implemented in other  
7 regions with less resources. Other respiratory disease such as influenza, measles, or  
8 tuberculosis may benefit from similar approach. However, further evaluation of the impact of  
9 the Corona Platform are required.  
10  
11  
12  
13  
14  
15  
16

## 17 **CONCLUSION**

18  
19  
20 Systematic testing of all suspected COVID-19 cases was feasible within primary care  
21 services in a Brazilian municipality. Anosmia, ageusia, and fever provide the greatest  
22 diagnostic discrimination from other similar primary care presentations. Home-care is a valid  
23 approach for most of these patients with a low rate of hospitalization and death.  
24 Our programme model – integrating multimedia technology, telehealth with universal access  
25 to primary care – may be successful in other contexts.  
26  
27  
28  
29  
30  
31

## 32 **CONTRIBUTION STATEMENT**

33  
34  
35 FEL, MCMC, SFC, MC, RB, and ECS conceived and designed the study. FEL, RMZG, and  
36 JCSB provided clinical oversight and supervision of medical students. FEL, MCMC, LFB,  
37 HD, OT, LC, and SRPS collected and curated the data. MCMC, TRTM, LSVB, and LCOS  
38 performed the laboratory analysis. LFB performed the formal statistical analysis with  
39 assistance from FEL, SRPS, NDEA, PM, ECS and OT. LFB, FEL, PM and ECS wrote the  
40 first draft, and all authors reviewed, contributed to and approved the final version.  
41  
42  
43  
44  
45  
46  
47

## 48 **CONFLICTS OF INTEREST STATEMENT**

49  
50  
51 The authors have no conflicts of interests. FL, RG, and JB were involved in providing  
52 clinical care within the Corona São Caetano Platform.  
53  
54  
55

## 56 **FUNDING STATEMENT**



1  
2  
3 The municipal health department of São Caetano do Sul (Secretaria Municipal de Saúde da  
4 Prefeitura de São Caetano do Sul) funded the establishment and implementation of the  
5 platform. We also acknowledge an award from FAPESP (2018/14389-0) and the UK Medical  
6 Research Council (MR/S0195/1) to the Brazil-UK Centre for Arbovirus Discovery,  
7 Diagnosis, Genomics and Epidemiology (CADDE).  
8  
9  
10  
11  
12

### 13 DATA SHARING STATEMENT

14  
15 Anonymized data are available at

16  
17 [https://figshare.com/articles/dataset/Clinical\\_features\\_and\\_natural\\_history\\_of\\_the\\_first\\_2\\_07\\_3\\_suspected\\_COVID-19\\_cases\\_in\\_the\\_Corona\\_S\\_o\\_Caetano\\_primary\\_care\\_programme\\_a\\_prospective\\_cohort\\_study/13322474](https://figshare.com/articles/dataset/Clinical_features_and_natural_history_of_the_first_2_07_3_suspected_COVID-19_cases_in_the_Corona_S_o_Caetano_primary_care_programme_a_prospective_cohort_study/13322474)  
18  
19  
20  
21  
22  
23  
24

### 25 REFERENCES

- 26  
27 1. World Health Organization. (2020). Pneumonia of unknown cause – China.  
28  
29 (https://www.who.int/csr/don/05-january-2020-pneumonia-of-unkown-cause-china/en/, accessed 2020-06-18).  
30  
31  
32  
33  
34
- 35 2. World Health Organization. Critical preparedness, readiness and response  
36 actions for COVID-19 (Interim Guidance) (https://www.who.int/publications-detail/critical-preparedness-readiness-and-response-actions-for-covid-19, accessed 15 June 2020).  
37  
38  
39  
40  
41  
42  
43
- 44 3. Bedford, J. et al. COVID-19: towards controlling of a pandemic. The Lancet **395**,  
45 1015–1018 (2020).  
46  
47  
48  
49
- 50 4. Hellewell, J. et al. Feasibility of controlling COVID-19 outbreaks by isolation of  
51 cases and contacts. Lancet Glob Health **8**, e488–e496 (2020).  
52  
53  
54  
55  
56  
57  
58  
59  
60

- 1  
2  
3 5. Dunlop, C., Howe, A., Li, D. & Allen, L. N. The coronavirus outbreak: the central  
4 role of primary care in emergency preparedness and response. *BJGP Open* **4**,  
5 *bjgpopen20X101041* (2020).  
6  
7
- 8  
9  
10 6. World Health Organization. Regional Office for the Western Pacific. (2020). Role  
11 of primary care in the COVID-19 response. (  
12 <https://apps.who.int/iris/handle/10665/331921>, accessed 15 June, 2020).  
13  
14
- 15  
16  
17 7. Redwood-Campbell, L. & Abrahams, J. Primary Health care and Disasters—The  
18 Current State of the Literature: What We Know, Gaps and Next Steps. *Prehosp.*  
19 *Disaster med.* **26**, 184–191 (2011).  
20  
21
- 22  
23  
24 8. Macinko, J. & Harris, M. J. Brazil's Family Health Strategy — Delivering  
25 Community-Based Primary Care in a Universal Health System. *NEJM* **372**,  
26 2177–2181 (2015).  
27  
28
- 29  
30  
31 9. World Health Organization. Situation report 27 (2020).  
32 ([https://www.who.int/emergencies/diseases/novel-coronavirus-2019/situation-](https://www.who.int/emergencies/diseases/novel-coronavirus-2019/situation-reports)  
33 [reports](https://www.who.int/emergencies/diseases/novel-coronavirus-2019/situation-reports), accessed 15 June 2020).  
34  
35
- 36  
37  
38 10. Brazilian Ministry of Health. (<https://covid.saude.gov.br/>).  
39  
40
- 41  
42  
43 11. Buss, L. F. et al. COVID-19 herd immunity in the Brazilian Amazon.  
44 <http://medrxiv.org/lookup/doi/10.1101/2020.09.16.20194787> (2020)  
45 [doi:10.1101/2020.09.16.20194787](https://doi.org/10.1101/2020.09.16.20194787).  
46  
47
- 48  
49  
50 12. de Souza, W. M. et al. Epidemiological and clinical characteristics of the COVID-  
51 19 epidemic in Brazil. *Nat Hum Behav* **4**, 856–865 (2020).  
52  
53  
54  
55  
56  
57  
58  
59  
60

- 1  
2  
3 13. Hallal, P. C. et al. SARS-CoV-2 antibody prevalence in Brazil: results from two  
4  
5 successive nationwide serological household surveys. *The Lancet Global Health*  
6  
7 S2214109X20303879 (2020) doi:10.1016/S2214-109X(20)30387-9.  
8  
9
- 10 14. Docherty, A. B. et al. Features of 20 133 UK patients in hospital with covid-19  
11  
12 using the ISARIC WHO Clinical Characterisation Protocol: prospective  
13  
14 observational cohort study. *BMJ* m1985 (2020) doi:10.1136/bmj.m1985.  
15  
16
- 17 15. Richardson, S. et al. Presenting Characteristics, Comorbidities, and Outcomes  
18  
19 Among 5700 Patients Hospitalized With COVID-19 in the New York City Area.  
20  
21 *JAMA* **323**, 2052 (2020).  
22  
23
- 24 16. Zhou, F. et al. Clinical course and risk factors for mortality of adult inpatients with  
25  
26 COVID-19 in Wuhan, China: a retrospective cohort study. *The Lancet* **395**, 1054–  
27  
28 1062 (2020).  
29  
30
- 31 17. Rauh, A. L. & Linder, J. A. Covid-19 care before, during, and beyond the hospital.  
32  
33 *BMJ* m2035 (2020) doi:10.1136/bmj.m2035.  
34  
35
- 36 18. Lapostolle, F. et al. Clinical features of 1487 COVID-19 patients with outpatient  
37  
38 management in the Greater Paris: the COVID-call study. *Intern Emerg Med* **15**,  
39  
40 813–817 (2020).  
41  
42  
43
- 44 19. Mizrahi, B. et al. Longitudinal symptom dynamics of COVID-19 infection in  
45  
46 primary care. <http://medrxiv.org/lookup/doi/10.1101/2020.07.13.20151795> (2020)  
47  
48 doi:10.1101/2020.07.13.20151795.  
49  
50
- 51 20. Williamson, E. J. et al. Factors associated with COVID-19-related death using  
52  
53 OpenSAFELY. *Nature* **584**, 430–436 (2020).  
54  
55  
56  
57  
58  
59  
60

- 1  
2  
3  
4 21. Instituto Brasileiro de Geografia e Estatística (IBGE). (2020). São Caetano do  
5  
6 Sul / Panorama. ([https://cidades.ibge.gov.br/brasil/sp/sao-caetano-do-](https://cidades.ibge.gov.br/brasil/sp/sao-caetano-do-sul/panorama)  
7  
8 [sul/panorama](https://cidades.ibge.gov.br/brasil/sp/sao-caetano-do-sul/panorama)).
- 9  
10  
11 22. Human Development Atlas Brazil. (2020). São Caetano do Sul  
12  
13 ([http://atlasbrasil.org.br/2013/pt/perfil\\_m/sao-caetano-do-sul\\_sp](http://atlasbrasil.org.br/2013/pt/perfil_m/sao-caetano-do-sul_sp)).
- 14  
15  
16 23. Brazilian COVID-19 case definition and notification criteria. Brazilian Ministry of  
17  
18 Health (<https://coronavirus.saude.gov.br/definicao-de-caso-e-notificacao>).
- 19  
20  
21 24. Akmatov, M. K., Gatzemeier, A., Schughart, K. & Pessler, F. Equivalence of Self-  
22  
23 and Staff-Collected Nasal Swabs for the Detection of Viral Respiratory  
24  
25 Pathogens. PLoS ONE **7**, e48508 (2012).
- 26  
27  
28 25. Walsh, K. A. et al. SARS-CoV-2 detection, viral load and infectivity over the  
29  
30 course of an infection. Journal of Infection **81**, 357–371 (2020).
- 31  
32  
33 26. Whitman, J. D. et al. Test performance evaluation of SARS-CoV-2 serological  
34  
35 assays. medRxiv 2020.04.25.20074856 (2020)  
36  
37 doi:10.1101/2020.04.25.20074856.
- 38  
39  
40 27. R Core Team. R: A language and environment for statistical computing. R  
41  
42 Foundation for Statistical Computing, Vienna, Austria. URL [https://www.R-](https://www.R-project.org/)  
43  
44 [project.org/](https://www.R-project.org/). (2019).
- 45  
46  
47 28. Baqui, P., Bica, I., Marra, V., Ercole, A. & van der Schaar, M. Ethnic and regional  
48  
49 variations in hospital mortality from COVID-19 in Brazil: a cross-sectional  
50  
51 observational study. The Lancet Global Health **8**, e1018–e1026 (2020).
- 52  
53  
54 29. Kucirka, L. M., Lauer, S. A., Laeyendecker, O., Boon, D. & Lessler, J. Variation in  
55  
56 False-Negative Rate of Reverse Transcriptase Polymerase Chain Reaction–  
57  
58  
59  
60

- 1  
2  
3 Based SARS-CoV-2 Tests by Time Since Exposure. *Ann Int Med* M20-1495  
4  
5 (2020) doi:10.7326/M20-1495.  
6  
7  
8 30. To, K. K.-W. et al. Temporal profiles of viral load in posterior oropharyngeal  
9  
10 saliva samples and serum antibody responses during infection by SARS-CoV-2:  
11  
12 an observational cohort study. *Lancet Inf Dis* **20**, 565–574 (2020).  
13  
14  
15  
16 31. He, X. et al. Temporal dynamics in viral shedding and transmissibility of COVID-  
17  
18 19. *Nat Med* **26**, 672–675 (2020).  
19  
20  
21  
22 32. Carpenter, C. R., Mudd, P. A., West, C. P., Wilber, E. & Wilber, S. T. Diagnosing  
23  
24 COVID-19 in the Emergency Department: A Scoping Review of Clinical  
25  
26 Examinations, Laboratory Tests, Imaging Accuracy, and Biases. *Acad Emerg*  
27  
28 *Med* **27**, 653–670 (2020).  
29  
30  
31  
32  
33 33. Vetter, P. et al. Clinical features of covid-19. *BMJ* m1470 (2020)  
34  
35 doi:10.1136/bmj.m1470.  
36  
37  
38 34. T. Team, Vital Surveillances: The Epidemiological Characteristics of an Outbreak  
39  
40 of 2019 Novel Coronavirus Diseases (COVID-19)-China. *China CDC Weekly* **2**,  
41  
42 113–122 (2020).  
43  
44  
45  
46 35. Salje, H. et al. Estimating the burden of SARS-CoV-2 in France. *Science*  
47  
48 eabc3517 (2020) doi:10.1126/science.abc3517.  
49  
50  
51 36. Verity, R. et al. Estimates of the severity of coronavirus disease 2019: a model-  
52  
53 based analysis. *Lancet Infect Dis* **20**, 669–677 (2020).  
54  
55  
56 37. Worster, A. & Carpenter, C. Incorporation bias in studies of diagnostic tests: how  
57  
58 to avoid being biased about bias. *CJEM* **10**, 174–175 (2008).  
59  
60

1  
2  
3  
4  
5  
6  
7  
8  
9  
10  
11  
12  
13  
14  
15  
16  
17  
18  
19  
20  
21  
22  
23  
24  
25  
26  
27  
28  
29  
30  
31  
32  
33  
34  
35  
36  
37  
38  
39  
40  
41  
42  
43  
44  
45  
46  
47  
48  
49  
50  
51  
52  
53  
54  
55  
56  
57  
58  
59  
60

For peer review only

## TABLE LEGENDS

**Table 1 Demographic and clinical characteristics of 1,048 suspected COVID-19 cases undergoing diagnostic testing in the Corona São Caetano program.** \* Security, emergency services, supermarket, public transport, and pharmacy workers. IQR: interquartile range; HCW: health care workers, COPD: chronic obstructive pulmonary disease. Missing data – educational level 2; essential occupation 2; body mass index 4; cardiovascular disease 28; diabetes 31 mellitus; chronic resp. disease 65; chronic kidney disease 27; COPD 28. P-values calculated by Chi-squared, Fisher exact, or Wilcoxon rank sum.

**Table 2 Characteristics of RT-PCR positive patients stratified by hospitalization status.** Missing data – body mass index 2; cardiovascular disease 12; diabetes mellitus 12; chronic respiratory disease 29; COPD 11; chronic kidney disease 12; COPD - chronic obstructive pulmonary disease; IQR - interquartile range.

## FIGURE LEGENDS

**Figure 1** Patient flowchart for the Corona São Caetano platform between 13<sup>th</sup> April and 13<sup>th</sup> May 2020. In the upper section (white background) the numbers correspond to individual presentations to the system; among suspected cases 2,073 suspected cases, 60 had two presentations and one had three. In the lower section (grey background) numbers correspond to individual patients making up the final analytic groups.

**Figure 2** Panel A presents prevalence (point) and exact binomial 95% confidence intervals (vertical lines) of symptoms at presentation among patients with suspected COVID-19 according to RT-PCR result and serostatus (A). Panels B and C present the prevalence of presenting symptoms among patients with COVID-19 (RT-PCR and serology positive) stratified by age (B) and sex (C).

**Figure 3** Odds ratios (black dot) and 95% confidence intervals (lines) for testing positive for COVID-19 (RT-PCR positive or serology positive) associated with the presence of each presenting symptom. Horizontal axis is on log scale. Point estimates of odds ratios are shown inline with their corresponding symptom.

1  
2  
3 **Figure 4** Relationship between mean RT-PCR cycle threshold (Ct) and day of illness course  
4 when the nasopharyngeal swab was collected (A), patient age (B), patient sex (C), and  
5 different symptoms at presentation. Panels A and B show the best fit linear regression lines,  
6 panels C and D are violin plots (rotated kernel density plots showing the full distribution of  
7 data) of the Ct values with median (black dot) and interquartile range (black line).  
8  
9  
10  
11  
12  
13  
14  
15  
16  
17  
18  
19  
20  
21  
22  
23  
24  
25  
26  
27  
28  
29  
30  
31  
32  
33  
34  
35  
36  
37  
38  
39  
40  
41  
42  
43  
44  
45  
46  
47  
48  
49  
50  
51  
52  
53  
54  
55  
56  
57  
58  
59  
60

For peer review only



**Table 1**

|                                                                                | <b>RT-PCR +ve<br/>(G1)</b><br>N = 444<br>n (%) or median (IQR) | <b>RT-PCR -ve<br/>Sero +ve (G2)</b><br>N=52<br>n (%) or median (IQR) | <b>RT-PCR -ve<br/>Sero -ve (G3)</b><br>N = 552<br>n (%) or median (IQR) | <b>p-value<br/>G1 versus G2</b> | <b>p-value<br/>G1 versus G3</b> |
|--------------------------------------------------------------------------------|----------------------------------------------------------------|----------------------------------------------------------------------|-------------------------------------------------------------------------|---------------------------------|---------------------------------|
| <b>Sex</b>                                                                     |                                                                |                                                                      |                                                                         |                                 |                                 |
| Male                                                                           | 200 (45.0)                                                     | 23 (44.2)                                                            | 185 (33.5)                                                              | 1.0                             | <0.001                          |
| Female                                                                         | 244 (55.0)                                                     | 29 (55.8)                                                            | 367 (66.5)                                                              |                                 |                                 |
| <b>Age groups (years)</b>                                                      |                                                                |                                                                      |                                                                         | 0.07                            | 0.40                            |
| 10 to 19                                                                       | 29 (6.5)                                                       | 1 (1.9)                                                              | 25 (4.5)                                                                |                                 |                                 |
| 20 to 39                                                                       | 197 (44.4)                                                     | 17 (32.7)                                                            | 236 (42.8)                                                              |                                 |                                 |
| 40 to 59                                                                       | 158 (35.6)                                                     | 28 (53.8)                                                            | 218 (39.5)                                                              |                                 |                                 |
| 60+                                                                            | 60 (13.5)                                                      | 6 (11.5)                                                             | 73 (13.2)                                                               |                                 |                                 |
| <b>Educational level</b>                                                       |                                                                |                                                                      |                                                                         | 0.10                            | <0.001                          |
| Up to primary education                                                        | 75 (16.9)                                                      | 7 (13.5)                                                             | 56 (10.2)                                                               |                                 |                                 |
| High school                                                                    | 214 (48.3)                                                     | 19 (36.5)                                                            | 194 (35.2)                                                              |                                 |                                 |
| University                                                                     | 154 (34.8)                                                     | 26 (50.0)                                                            | 301 (54.6)                                                              |                                 |                                 |
| <b>Essential Occupation</b>                                                    |                                                                |                                                                      |                                                                         | 0.45                            | 0.01                            |
| Non-HCW essential job *                                                        | 137 (30.9)                                                     | 12 (23.1)                                                            | 148 (26.9)                                                              |                                 |                                 |
| Carers                                                                         | 10 (2.3)                                                       | 0 (0.0)                                                              | 8 (1.5)                                                                 |                                 |                                 |
| HCW                                                                            | 32 (7.2)                                                       | 5 (9.6)                                                              | 73 (13.2)                                                               |                                 |                                 |
| No                                                                             | 264 (59.6)                                                     | 35 (67.3)                                                            | 322 (58.4)                                                              |                                 |                                 |
| <b>Body mass index (kg/m<sup>2</sup>)</b>                                      |                                                                |                                                                      |                                                                         | 0.62                            | 0.14                            |
| <25                                                                            | 151 (34.2)                                                     | 22 (42.3)                                                            | 211 (38.4)                                                              |                                 |                                 |
| 25-29                                                                          | 182 (41.2)                                                     | 17 (32.7)                                                            | 187 (34.0)                                                              |                                 |                                 |
| 30-35                                                                          | 79 (17.9)                                                      | 9 (17.3)                                                             | 112 (20.4)                                                              |                                 |                                 |
| 35+                                                                            | 30 (6.8)                                                       | 4 (7.7)                                                              | 40 (7.3)                                                                |                                 |                                 |
| <b>Comorbidities</b>                                                           |                                                                |                                                                      |                                                                         | 0.89                            | 0.40                            |
| Cardiovascular disease                                                         | 88 (20.4)                                                      | 9 (17.6)                                                             | 129 (24.0)                                                              |                                 |                                 |
| Diabetes mellitus                                                              | 48 (11.1)                                                      | 4 (7.8)                                                              | 39 (7.3)                                                                |                                 |                                 |
| Any chronic resp. disease                                                      | 37 (8.9)                                                       | 9 (18.0)                                                             | 79 (15.3)                                                               |                                 |                                 |
| COPD                                                                           | 24 (5.5)                                                       | 5 (9.8)                                                              | 54 (10.1)                                                               |                                 |                                 |
| Chronic kidney disease                                                         | 1 (<1)                                                         | 0 (0.0)                                                              | 3 (1.0)                                                                 | 1.0                             | 0.83                            |
| <b>Time from symptom<br/>onset to swab collection<br/>(days), median (IQR)</b> | 5.0 (4.0-7.0)                                                  | 6.0 (4.0-8.3)                                                        | 6.0 (4.0-9.0)                                                           | 0.06                            | <0.001                          |

**Table 2**

|                                           | <b>Hospitalized</b><br>n=30<br>n (%) or median (IQR) | <b>Not hospitalized</b><br>n=414<br>n (%) or median (IQR) | <b>p-value</b> |
|-------------------------------------------|------------------------------------------------------|-----------------------------------------------------------|----------------|
| <b>Age (years)</b>                        |                                                      |                                                           |                |
| 10 to 19                                  | 1 (3)                                                | 28 (97)                                                   |                |
| 20 to 39                                  | 6 (3)                                                | 191 (97)                                                  |                |
| 40 to 59                                  | 14 (9)                                               | 144 (91)                                                  |                |
| 60+                                       | 9 (15)                                               | 51 (85)                                                   | 0.006          |
| <b>Sex</b>                                |                                                      |                                                           |                |
| Female                                    | 16 (7)                                               | 228 (93)                                                  |                |
| Male                                      | 14 (7)                                               | 186 (93)                                                  | 0.852          |
| <b>Comorbidities</b>                      |                                                      |                                                           |                |
| Cardiovascular disease                    | 11 (13)                                              | 77 (87)                                                   | 0.001          |
| Diabetes mellitus                         | 8 (17)                                               | 40 (83)                                                   | 0.007          |
| Any chronic resp. disease                 | 2 (5)                                                | 35 (95)                                                   | 1.0            |
| COPD                                      | 1 (5)                                                | 23 (95)                                                   | 1.0            |
| Chronic kidney disease                    | 1 (100)                                              | 0 (0)                                                     | 0.06           |
| <b>Body mass index (Kg/m<sup>2</sup>)</b> |                                                      |                                                           |                |
| <25                                       | 4 (3)                                                | 147 (97)                                                  |                |
| 25-29                                     | 8 (4)                                                | 174 (96)                                                  |                |
| 30-35                                     | 12 (15)                                              | 67 (85)                                                   |                |
| 35+                                       | 6 (20)                                               | 24 (80)                                                   | <0.001         |
| <b>Time to presentation (days)</b>        | 3 (3 to 4)                                           | 4 (3 to 5)                                                | 0.072          |



Figure 1

246x181mm (300 x 300 DPI)

1  
2  
3  
4  
5  
6  
7  
8  
9  
10  
11  
12  
13  
14  
15  
16  
17  
18  
19  
20  
21  
22  
23  
24  
25  
26  
27  
28  
29  
30  
31  
32  
33  
34  
35  
36  
37  
38  
39  
40  
41  
42  
43  
44  
45  
46  
47  
48  
49  
50  
51  
52  
53  
54  
55  
56  
57  
58  
59  
60



Figure 2

187x158mm (300 x 300 DPI)



Figure 3

154x100mm (300 x 300 DPI)



Figure 4

327x222mm (300 x 300 DPI)

## Supplemental material

### Contents:

1. Initial risk assessment
2. Screen shots of multimedia platform and the initial questionnaire
3. Supplemental Table S1
4. Supplemental figs S1-S5

#### Initial risk assessment

Patients meeting the definition of a suspected case were called by a medical student (under supervision) to complete a risk assessment. All patients were asked a set of standardized questions:

- Do you feel short of breath?
- Are you breathing quickly or finding it difficult to breath?
- If yes, can you count your respiratory rate over one minute? (respiratory rate >20 breaths/minute was considered tachypnoea)
- Has your fever worsened over the last 3 days or have you had a new fever after 2 days being fever-free?
- Have you felt confused or lethargic?

If the patient answered “yes” to any of these questions they were advised to attend a specialist health service. Among the 132 patients that were triaged to hospital, 76 (58% of 132) had shortness of breath, 76 (58% of 132) reported rapid breathing, 33 (25% of 132) persistent fever and 22 (17% of 132) altered mental status.

1  
2  
3  
4 **Screen shots showing examples of the initial questionnaire completed**  
5  
6  
7

8 1) Welcome page  
9

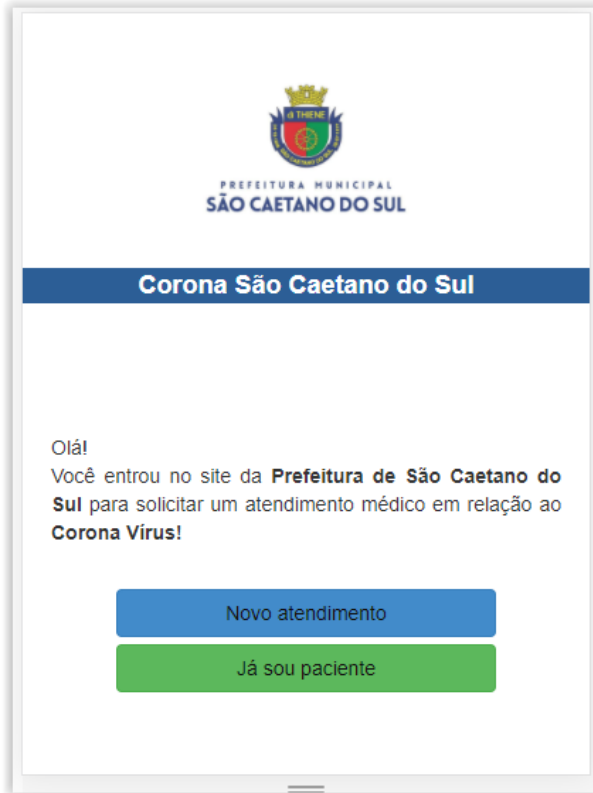



## 2) Zipcode confirmation

1  
2  
3  
4  
5  
6  
7  
8  
9  
10  
11  
12  
13  
14  
15  
16  
17  
18  
19  
20  
21  
22  
23  
24  
25  
26  
27  
28  
29  
30  
31  
32  
33  
34  
35  
36  
37  
38  
39  
40  
41  
42  
43  
44  
45  
46  
47  
48  
49  
50  
51  
52  
53  
54  
55  
56  
57  
58  
59  
60



  
PREFEITURA MUNICIPAL  
SÃO CAETANO DO SUL

**Corona São Caetano do Sul**

**Informe seu CEP**

09581-670

**Continuar**

Copyright © 2020 MRS - Modular Research System.  
Todos os direitos reservados.

3) Patient basic information

The screenshot shows a web form for 'Corona São Caetano do Sul'. At the top is the logo of the 'PREFEITURA MUNICIPAL SÃO CAETANO DO SUL'. Below the logo is a blue header with the text 'Corona São Caetano do Sul'. Underneath the header, the instruction 'Preencha as informações abaixo' is displayed in red. The form contains four input fields: 'Nome' (with a search icon), 'Sobrenome', 'Celular com DDD', and 'Sexo:' (a dropdown menu with '- selecionar -' selected). A large, light blue watermark 'view only' is overlaid diagonally across the bottom right of the form area.

## 4) Access code confirmation



## 5) Questionnaire

Perguntas obrigatórias, favor responder:

**Dados demográficos**

**Se do sexo feminino, está grávida?**

Não

Sim

Não se aplica

**A partir do dia 1º de Março você atuou em alguma destas áreas:**

Não

Profissional da saúde

Áreas essenciais (segurança, bombeiro, farmácia, supermercado, transporte público)

Cuidador (a)

**Dados clínicos**

**Teve febre?**

Não

Sim

**Se sim, você mediu a febre?**

Não

Sim

**Se sim, qual foi a temperatura mais alta?**

**Você tem tosse?**

Não

Sim

## 6) Orientation page



**Table S1 Univariable and adjusted associations between RT-PCR cycle thresholds and patient characteristics**

|                                                                      | Unadjusted analysis        |                         | Adjusted analysis *        |                         |
|----------------------------------------------------------------------|----------------------------|-------------------------|----------------------------|-------------------------|
|                                                                      | Beta (difference in means) | 95% Confidence interval | Beta (difference in means) | 95% Confidence interval |
| Age (years)                                                          | <b>-0.05</b>               | <b>-0.09 to -0.01</b>   | <b>-0.06</b>               | <b>-0.09 to -0.03</b>   |
| Male sex                                                             | <b>-1.36</b>               | <b>-2.49 to -0.23</b>   | -1.05                      | -2.09 to <0.001         |
| Days from symptom onset to swab collection (days, log <sub>2</sub> ) | <b>3.28</b>                | <b>2.33 to 4.03</b>     | <b>3.27</b>                | <b>0.42 to 7.70</b>     |
| PCR platform (ALTONA as reference)                                   | <b>-1.19</b>               | <b>-2.37 to -0.02</b>   | <b>-1.53</b>               | <b>-2.6 to -0.45</b>    |
| <b>Symptoms at presentation</b>                                      |                            |                         |                            |                         |
| Fever                                                                | <b>-1.78</b>               | <b>-2.96 to -0.59</b>   | <b>-1.11</b>               | <b>-2.11 to -0.001</b>  |
| Myalgia                                                              | -1.31                      | -2.75 to 0.12           | -0.78                      | -2.11 to 0.53           |
| Arthralgia                                                           | <b>-1.64</b>               | <b>-2.77 to -0.52</b>   | <b>-1.24</b>               | <b>-2.18 to -0.10</b>   |
| Anosmia                                                              | <b>3.15</b>                | <b>2.04 to 4.25</b>     | <b>2.21</b>                | <b>1.0 to 3.29</b>      |
| Agusia                                                               | <b>2.99</b>                | <b>1.89 to 4.09</b>     | <b>1.96</b>                | <b>0.88 to 3.0</b>      |
| Diarrhea                                                             | <b>2.19</b>                | <b>0.84 to 3.53</b>     | <b>1.36</b>                | <b>0.12 to 2.61</b>     |
| Nausea                                                               | <b>1.50</b>                | <b>0.28 to 2.72</b>     | 1.09                       | -0.04 to 2.24           |
| Vomiting                                                             | <b>2.99</b>                | <b>0.52 to 5.46</b>     | 2.02                       | -0.28 to 4.33           |
| Anorexia                                                             | 0.56                       | -0.57 to 1.70           | 0.47                       | -0.58 to 1.51           |
| Headache                                                             | -0.58                      | -2.12 to 0.97           | -0.81                      | -2.25 to 0.63           |
| Fatigue                                                              | 0.84                       | -0.50 to 2.18           | 0.34                       | -0.91 to 1.59           |
| Coryza                                                               | -0.78                      | -1.92 to 0.34           | -0.68                      | -1.72 to 0.34           |
| Blocked nose                                                         | -0.36                      | -1.53 to 0.81           | <b>-1.48</b>               | <b>-2.59 to -0.37</b>   |
| Cough                                                                | -1.33                      | -2.70 to 0.03           | <b>-1.60</b>               | <b>-2.86 to -0.33</b>   |
| Sore throat                                                          | -0.49                      | -1.62 to 0.64           | -0.45                      | -1.52 to 0.61           |

\* All variables adjusted for age (continuous in years), sex (female as reference group), PCR platform (ALTONA platform as the reference group) and time between symptom onset and swab collection (log base 2). Analysis was performed within a linear regression framework. Positive beta coefficients indicate higher cycle thresholds (lower viral load) associated with that variable, whereas negative beta coefficients indicate lower cycle thresholds when the variable is present. Results in bold reached statistical significance.

Supplemental figures



**Figure S1** Comparison of cycle thresholds across PCR platforms and genes amplified. Upper two panels show the concordance between cycle thresholds for the two separate genes amplified by the ALTONA (left) and Mico Biomed (right) kits. Lower left panel – distribution of cycle thresholds by gene amplified and RT-PCR platform used. Lower right-hand panel – distribution of the mean cycle threshold (mean of cycle thresholds for separate genes) between different RT-PCR platforms.

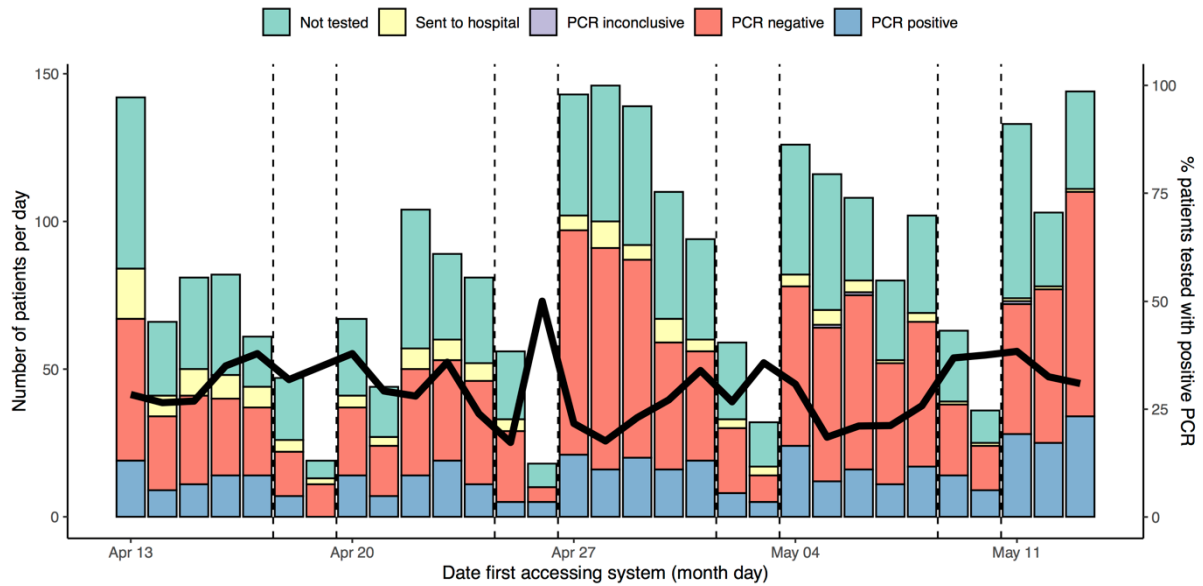

**Figure S2** Time series of presentations to the Corona São Caetano platform. Dashed vertical lines denote the weekends with a reduced number of presentations. Thick black line corresponds to the right-hand y-axis: proportion of RT-PCRs performed with positive result.

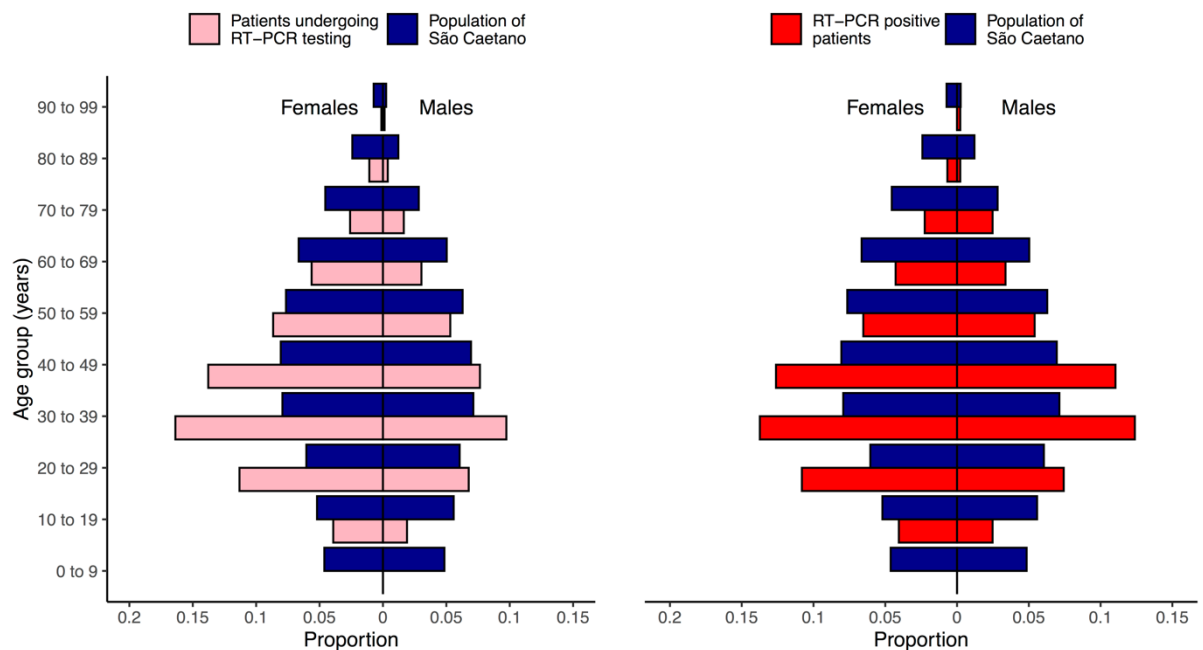

**Figure S3** Age-sex distribution the city of São Caetano do Sul compared with that of patients accessing the Corona São Caetano system and being tested with RT-PCR (left-hand panel) and those testing positive for SARS-CoV-2 (right-hand panel).



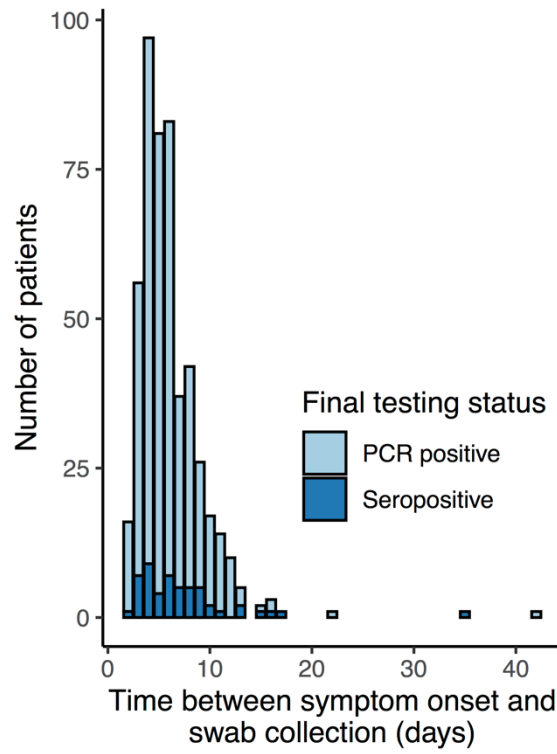

**Figure S4** Histogram of delay between symptom onset and swab collection among patients with COVID-19.



**Figure S5** Left hand figures show symptoms at each follow-up questionnaire among patients testing RT-PCR positive and undergoing follow-up. Individual patients are stacked on the y-axis ordered according to the delay from symptom onset to presentation. Each point represents the response to a questionnaire and its position on the horizontal axis the time after symptom onset that the questionnaire was filled in. Grey points are questionnaires where the patient denied the presence of a given symptom. The coloured points correspond to questionnaires in which the patient reported a given symptom. The right-hand figures results from grouping the horizontal axis time into two-day windows and calculating the proportion of completed questionnaires in which each symptom was reported. The denominators for the horizontal axis groups (number of questionnaires completed within a given time window from symptom onset) are 104 at [0-2] days, 192 at (2-4], 185 at (4-6], 293 at (6-8], 338 at (8-10], 329 at (10-12], 335 at (12-14], 324 at (14-16], 280 at (16-18] and 201 at (18-20].

STROBE Statement—Checklist of items that should be included in reports of *cohort studies*

|                              | Item No | Recommendation                                                                                                                                                                                                                                                                                                         | Page No                                                                     |
|------------------------------|---------|------------------------------------------------------------------------------------------------------------------------------------------------------------------------------------------------------------------------------------------------------------------------------------------------------------------------|-----------------------------------------------------------------------------|
| <b>Title and abstract</b>    | 1       | (a) Indicate the study's design with a commonly used term in the title or the abstract<br>(b) Provide in the abstract an informative and balanced summary of what was done and what was found                                                                                                                          | 1 and 2                                                                     |
| <b>Introduction</b>          |         |                                                                                                                                                                                                                                                                                                                        |                                                                             |
| Background/rationale         | 2       | Explain the scientific background and rationale for the investigation being reported                                                                                                                                                                                                                                   | 4                                                                           |
| Objectives                   | 3       | State specific objectives, including any prespecified hypotheses                                                                                                                                                                                                                                                       | 4                                                                           |
| <b>Methods</b>               |         |                                                                                                                                                                                                                                                                                                                        |                                                                             |
| Study design                 | 4       | Present key elements of study design early in the paper                                                                                                                                                                                                                                                                | 5 to 7                                                                      |
| Setting                      | 5       | Describe the setting, locations, and relevant dates, including periods of recruitment, exposure, follow-up, and data collection                                                                                                                                                                                        | 5 to 6                                                                      |
| Participants                 | 6       | (a) Give the eligibility criteria, and the sources and methods of selection of participants. Describe methods of follow-up<br>(b) For matched studies, give matching criteria and number of exposed and unexposed                                                                                                      | A – 5<br>B - NA                                                             |
| Variables                    | 7       | Clearly define all outcomes, exposures, predictors, potential confounders, and effect modifiers. Give diagnostic criteria, if applicable                                                                                                                                                                               | 7 to 8                                                                      |
| Data sources/<br>measurement | 8*      | For each variable of interest, give sources of data and details of methods of assessment (measurement). Describe comparability of assessment methods if there is more than one group                                                                                                                                   | 5 to 7                                                                      |
| Bias                         | 9       | Describe any efforts to address potential sources of bias                                                                                                                                                                                                                                                              | 7 to 8                                                                      |
| Study size                   | 10      | Explain how the study size was arrived at                                                                                                                                                                                                                                                                              | 8                                                                           |
| Quantitative variables       | 11      | Explain how quantitative variables were handled in the analyses. If applicable, describe which groupings were chosen and why                                                                                                                                                                                           |                                                                             |
| Statistical methods          | 12      | (a) Describe all statistical methods, including those used to control for confounding<br>(b) Describe any methods used to examine subgroups and interactions<br>(c) Explain how missing data were addressed<br>(d) If applicable, explain how loss to follow-up was addressed<br>(e) Describe any sensitivity analyses | A – 7 to 8<br>B – NA<br>C – 8<br>D – NA<br>E – NA                           |
| <b>Results</b>               |         |                                                                                                                                                                                                                                                                                                                        |                                                                             |
| Participants                 | 13*     | (a) Report numbers of individuals at each stage of study—eg numbers potentially eligible, examined for eligibility, confirmed eligible, included in the study, completing follow-up, and analysed<br>(b) Give reasons for non-participation at each stage<br>(c) Consider use of a flow diagram                        | Figure 1<br>and page<br>9                                                   |
| Descriptive data             | 14*     | (a) Give characteristics of study participants (eg demographic, clinical, social) and information on exposures and potential confounders<br>(b) Indicate number of participants with missing data for each variable of interest                                                                                        | A – table<br>1 and<br>pages<br>9to10<br><br>B - Table<br>1 and 2<br>legends |

|                          |     |                                                                                                                                                                                                                                                                                                                                                                                                               |                                     |
|--------------------------|-----|---------------------------------------------------------------------------------------------------------------------------------------------------------------------------------------------------------------------------------------------------------------------------------------------------------------------------------------------------------------------------------------------------------------|-------------------------------------|
|                          |     | (c) Summarise follow-up time (eg, average and total amount)                                                                                                                                                                                                                                                                                                                                                   | C – page<br>9                       |
| Outcome data             | 15* | Report numbers of outcome events or summary measures over time                                                                                                                                                                                                                                                                                                                                                | 11                                  |
| Main results             | 16  | (a) Give unadjusted estimates and, if applicable, confounder-adjusted estimates and their precision (eg, 95% confidence interval). Make clear which confounders were adjusted for and why they were included<br>(b) Report category boundaries when continuous variables were categorized<br>(c) If relevant, consider translating estimates of relative risk into absolute risk for a meaningful time period | Page 7<br>and<br>results<br>section |
| Other analyses           | 17  | Report other analyses done—eg analyses of subgroups and interactions, and sensitivity analyses                                                                                                                                                                                                                                                                                                                | NA                                  |
| <b>Discussion</b>        |     |                                                                                                                                                                                                                                                                                                                                                                                                               |                                     |
| Key results              | 18  | Summarise key results with reference to study objectives                                                                                                                                                                                                                                                                                                                                                      | 12                                  |
| Limitations              | 19  | Discuss limitations of the study, taking into account sources of potential bias or imprecision. Discuss both direction and magnitude of any potential bias                                                                                                                                                                                                                                                    | 13                                  |
| Interpretation           | 20  | Give a cautious overall interpretation of results considering objectives, limitations, multiplicity of analyses, results from similar studies, and other relevant evidence                                                                                                                                                                                                                                    | 13                                  |
| Generalisability         | 21  | Discuss the generalisability (external validity) of the study results                                                                                                                                                                                                                                                                                                                                         | 13                                  |
| <b>Other information</b> |     |                                                                                                                                                                                                                                                                                                                                                                                                               |                                     |
| Funding                  | 22  | Give the source of funding and the role of the funders for the present study and, if applicable, for the original study on which the present article is based                                                                                                                                                                                                                                                 | 14                                  |

\*Give information separately for exposed and unexposed groups.

**Note:** An Explanation and Elaboration article discusses each checklist item and gives methodological background and published examples of transparent reporting. The STROBE checklist is best used in conjunction with this article (freely available on the Web sites of PLoS Medicine at <http://www.plosmedicine.org/>, Annals of Internal Medicine at <http://www.annals.org/>, and Epidemiology at <http://www.epidem.com/>). Information on the STROBE Initiative is available at <http://www.strobe-statement.org>.
